# Supplementary material
Source: publisher figshare collection journal article supplement (https://acs.figshare.com/ndownloader/files/12459743)
Supplement: Supplementary file 1 [file 12459743]

# Supporting Information

## Visible-Light-Activated Catalytic Enantioselective $\beta$ -Alkylation of $\alpha,\beta$ -Unsaturated 2-Acyl Imidazoles Using Hantzsch Esters as Radical Reservoirs

Francisco F. de Assis,<sup>1,2</sup> Xiaoqiang Huang,<sup>2</sup> Midori Akiyama,<sup>3</sup> Ronaldo A. Pilli<sup>1</sup> and Eric Meggers<sup>\*2</sup>

<sup>1</sup>Instituto de Química, Universidade Estadual de Campinas, 13084-971 Campinas - SP, Brazil

<sup>2</sup>Fachbereich Chemie, Philipps-Universität Marburg, Hans-Meerwein-Strasse 4, 35043 Marburg, Germany

<sup>3</sup>Department of Chemistry & Biotechnology, School of Engineering, The University of Tokyo, Japan

\*meggers@chemie.uni-marburg.de

### TABLE OF CONTENTS

|                                  |     |
|----------------------------------|-----|
| 1. Cyclic voltammetry of 2a..... | S2  |
| 2. HPLC Traces.....              | S3  |
| 3. NMR Spectra.....              | S18 |

## 1. Cyclic voltammetry of **2a**

Voltammetric experiments were conducted with a computer controlled Eco Chemie AutolabPGSTAT204 potentiostat in a Metrohm electrochemical cell containing a 1 mm diameter planar platinum electrode, a Pt wire electrode and a Ag/AgCl/KCl (3 M) reference electrode. The solution used for the voltammetric experiment was deoxygenated by nitrogen gas and measurement was performed at room temperature ( $22 \pm 2$  °C). As shown in Figure S1, Hantzsch ester **2a** could be oxidized in a chemically irreversible process with  $E_p^{ox} = +1.03$  V vs. Ag/AgCl.

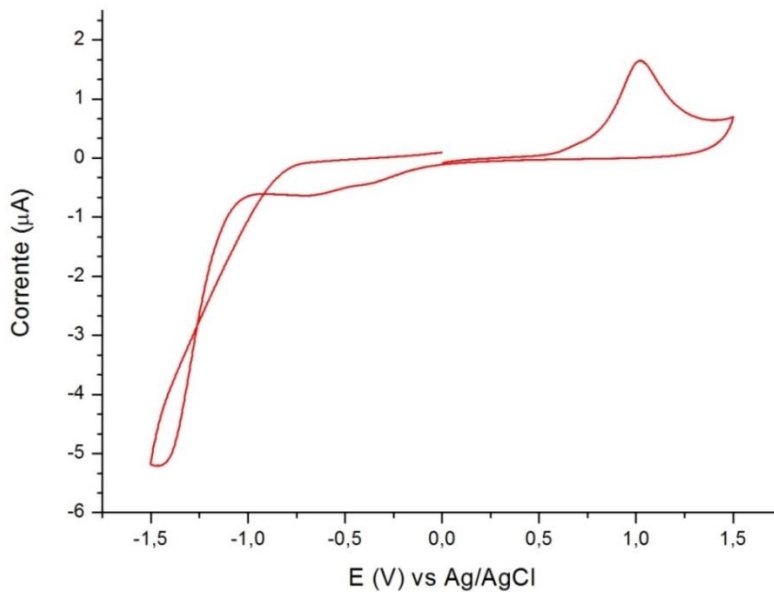

**Figure S1.** CV of a 0.1 M solution of **2a** in  $\text{CH}_2\text{Cl}_2$  containing 0.1 M  $n\text{-Bu}_4\text{NPF}_6$  at a scan rate = 0.1 V/s.

## 2. HPLC Traces

Enantiomeric purities of the reaction products were determined with a Daicel Chiralpak AD-H, OD-H or OJ-H (250 × 4.6 mm) HPLC column on an Agilent 1200 or 1260 Series HPLC System using hexane/isopropanol as a mobile phase. The column temperature was 25 °C and UV-absorption was measured at 254 nm.

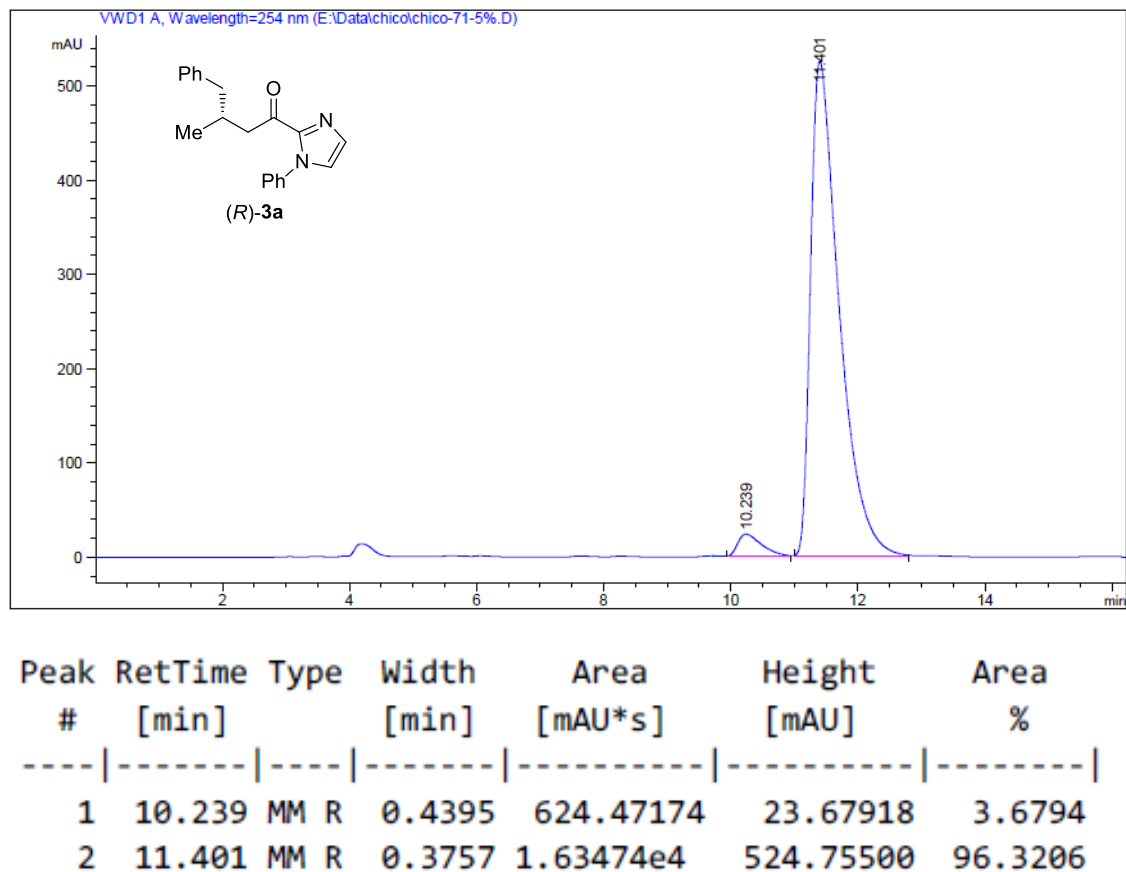

Figure S2. HPLC trace of (R)-3a.

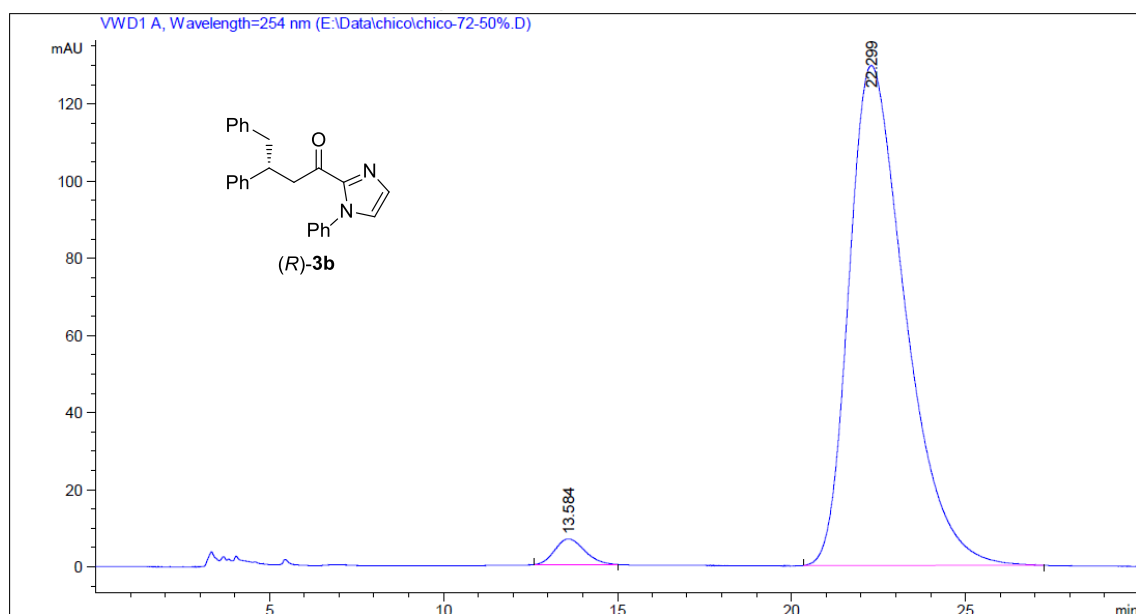

| Peak # | RetTime [min] | Type | Width [min] | Area [mAU*s] | Height [mAU] | Area %  |
|--------|---------------|------|-------------|--------------|--------------|---------|
| 1      | 13.584        | MM R | 0.9925      | 399.65662    | 6.71100      | 2.6690  |
| 2      | 22.299        | MM R | 1.8742      | 1.45743e4    | 129.60355    | 97.3310 |

Figure S3. HPLC trace of (R)-3b.

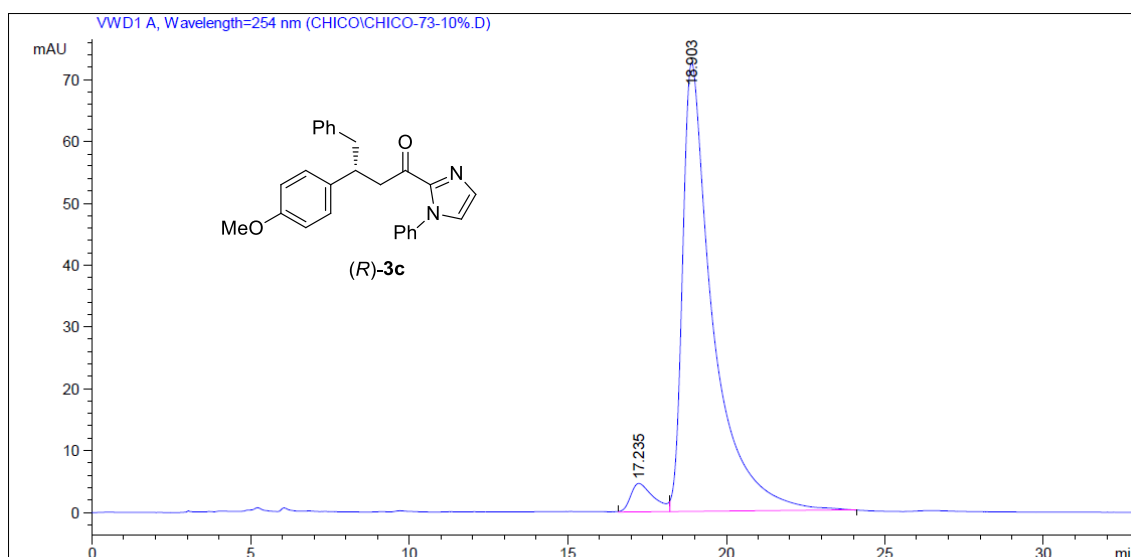

| Peak # | RetTime [min] | Type | Width [min] | Area mAU   | Height [mAU] | Area %  |
|--------|---------------|------|-------------|------------|--------------|---------|
| 1      | 17.235        | MF R | 0.8451      | 233.57275  | 4.60662      | 4.6430  |
| 2      | 18.903        | FM R | 0.9733      | 4797.03809 | 72.63154     | 95.3570 |

**Figure S4.** HPLC trace of (R)-3c.

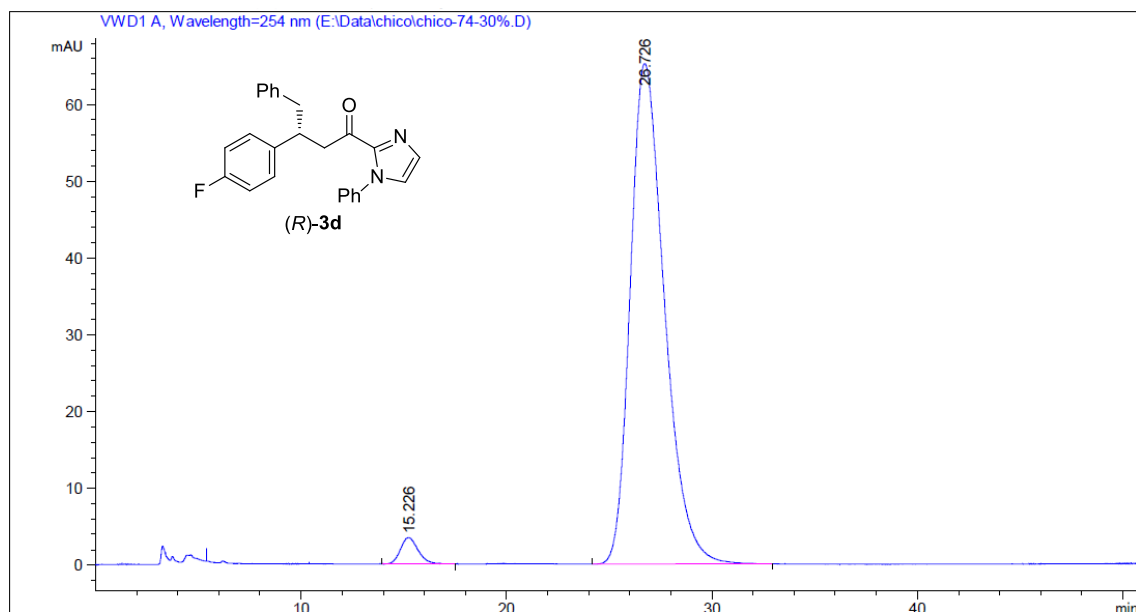

| Peak # | RetTime [min] | Type | Width [min] | Area [mAU*s] | Height [mAU] | Area %  |
|--------|---------------|------|-------------|--------------|--------------|---------|
| 1      | 15.226        | MM R | 1.0045      | 208.04187    | 3.45174      | 2.6822  |
| 2      | 26.726        | MM R | 1.9288      | 7548.20703   | 65.22422     | 97.3178 |

Figure S5. HPLC trace of (R)-3d.

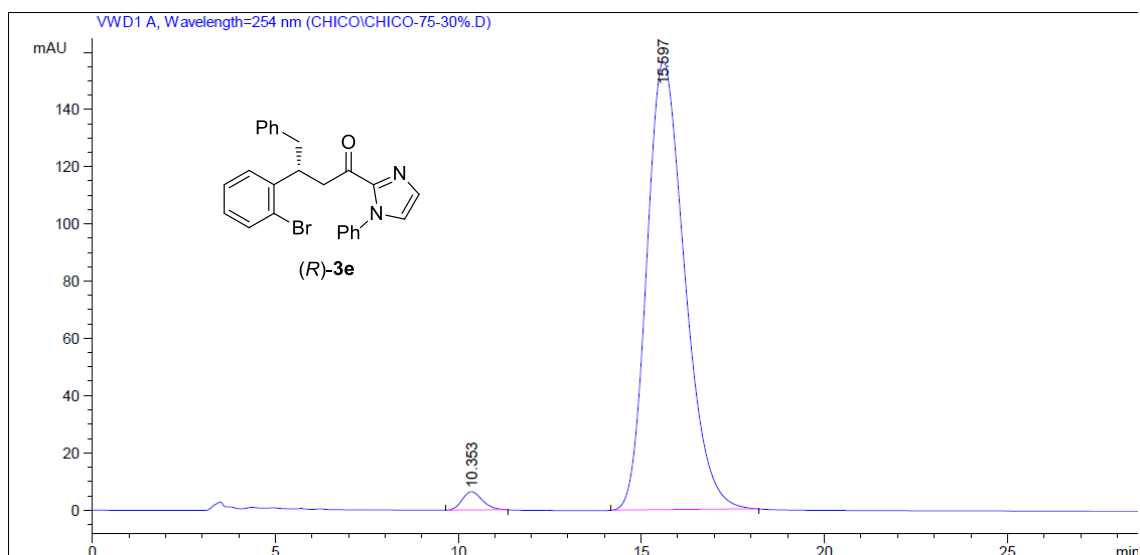

| Peak # | RetTime [min] | Type | Width [min] | Area mAU *s | Height [mAU] | Area %  |
|--------|---------------|------|-------------|-------------|--------------|---------|
| 1      | 10.353        | BB   | 0.5978      | 249.55544   | 6.41751      | 2.1674  |
| 2      | 15.597        | BB   | 1.1105      | 1.12645e4   | 156.77347    | 97.8326 |

**Figure S6.** HPLC trace of (R)-3e.

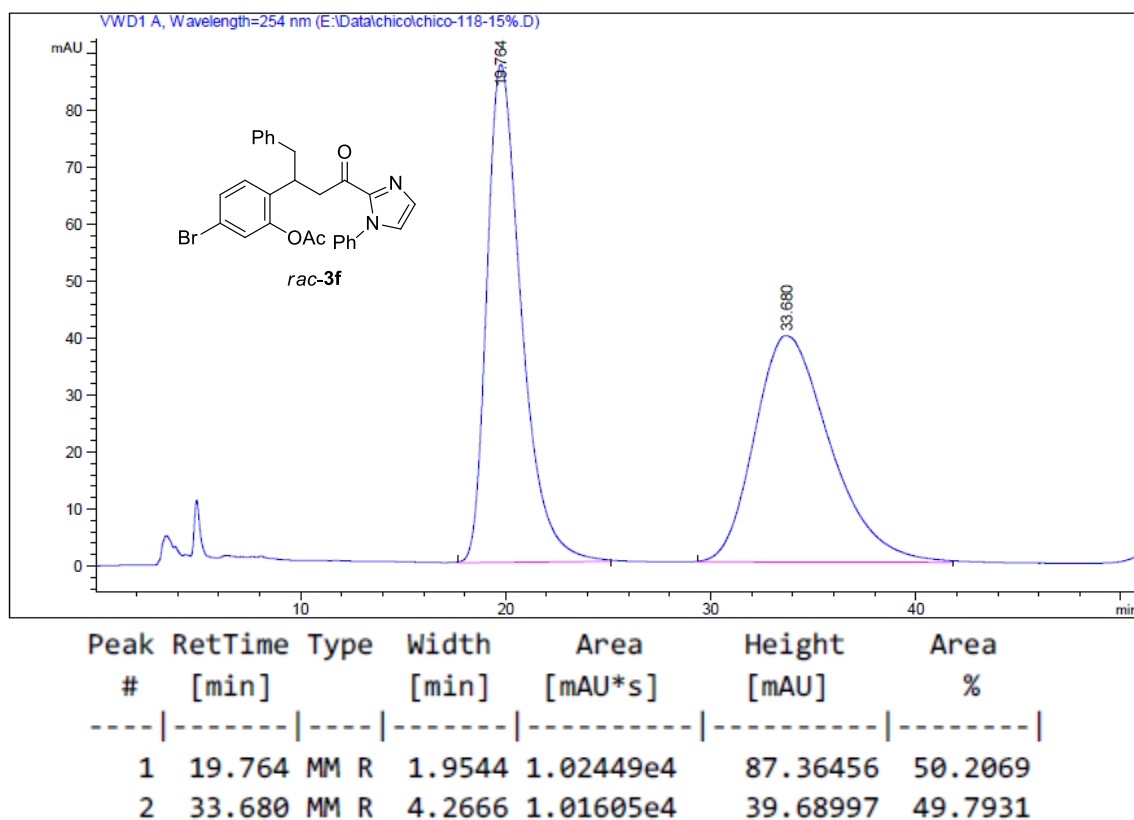

Figure S7. HPLC trace of *rac*-3f.

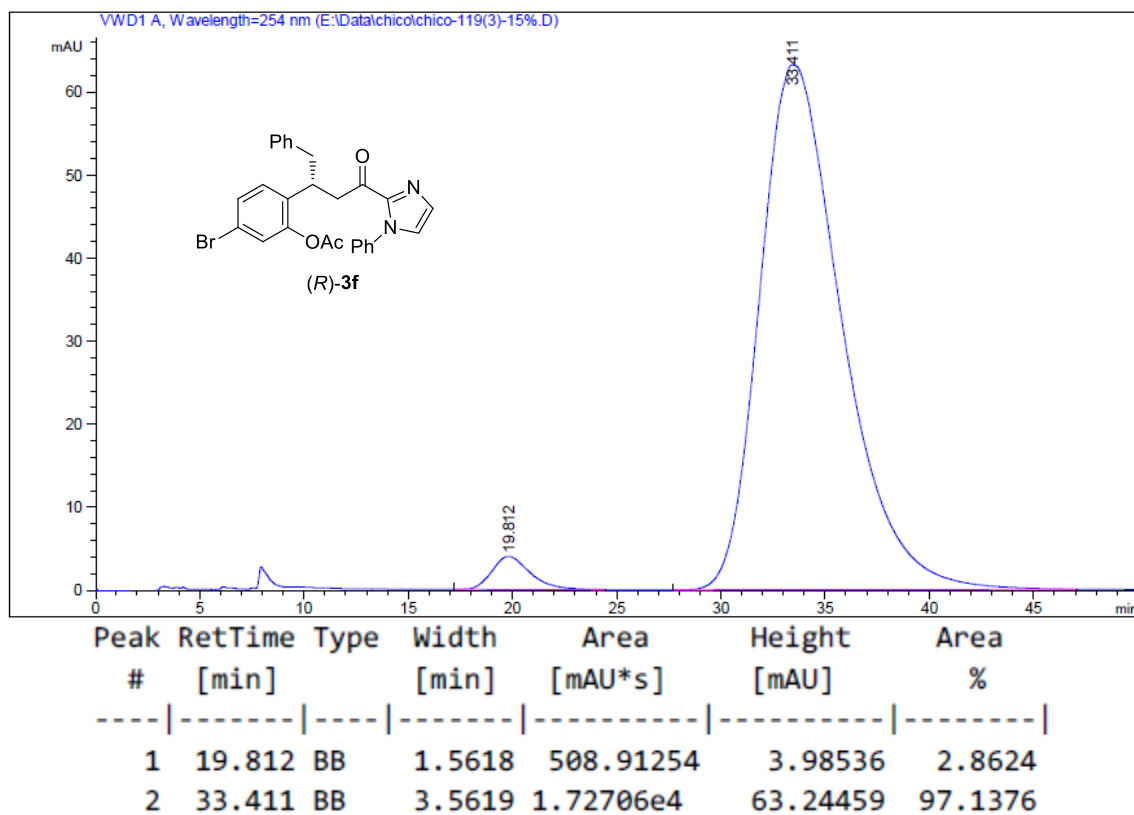

Figure S8. HPLC trace of (*R*)-3f.



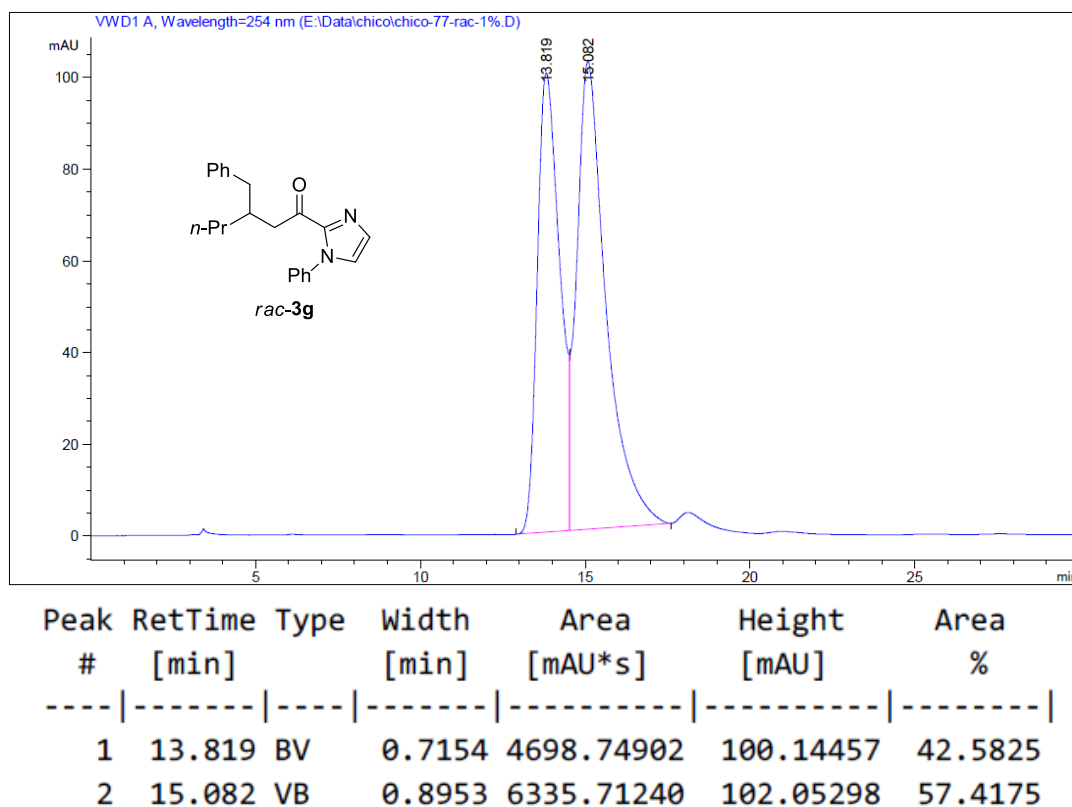

Figure S9. HPLC trace of *rac*-3g.

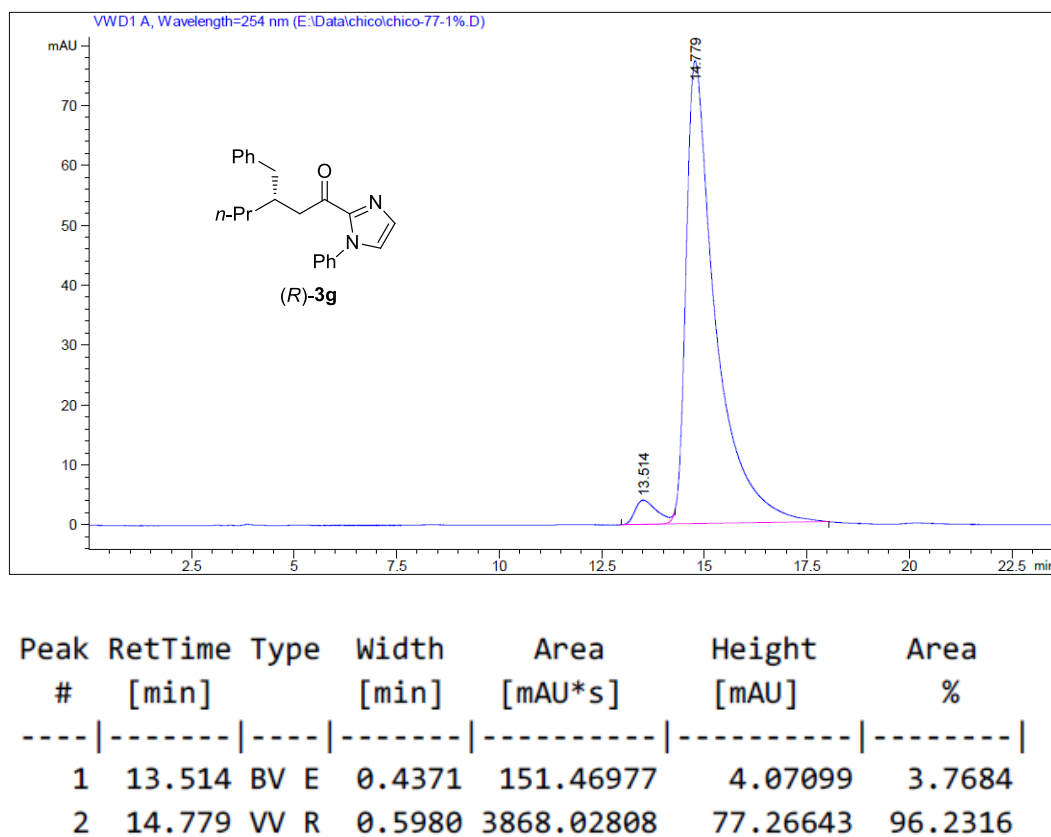

Figure S10. HPLC trace of (*R*)-3g.

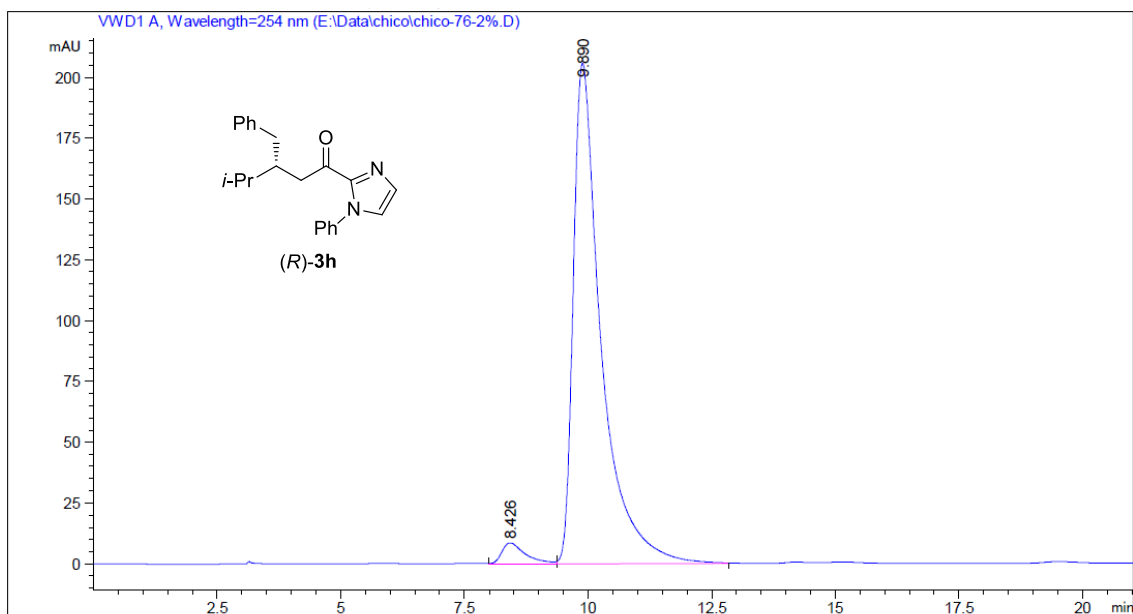

| Peak # | RetTime [min] | Type | Width [min] | Area [mAU*s] | Height [mAU] | Area %  |
|--------|---------------|------|-------------|--------------|--------------|---------|
| 1      | 8.426         | MF R | 0.5495      | 282.95898    | 8.58157      | 3.3946  |
| 2      | 9.890         | FM R | 0.6525      | 8052.58984   | 205.69638    | 96.6054 |

**Figure S11.** HPLC trace of (R)-3h.

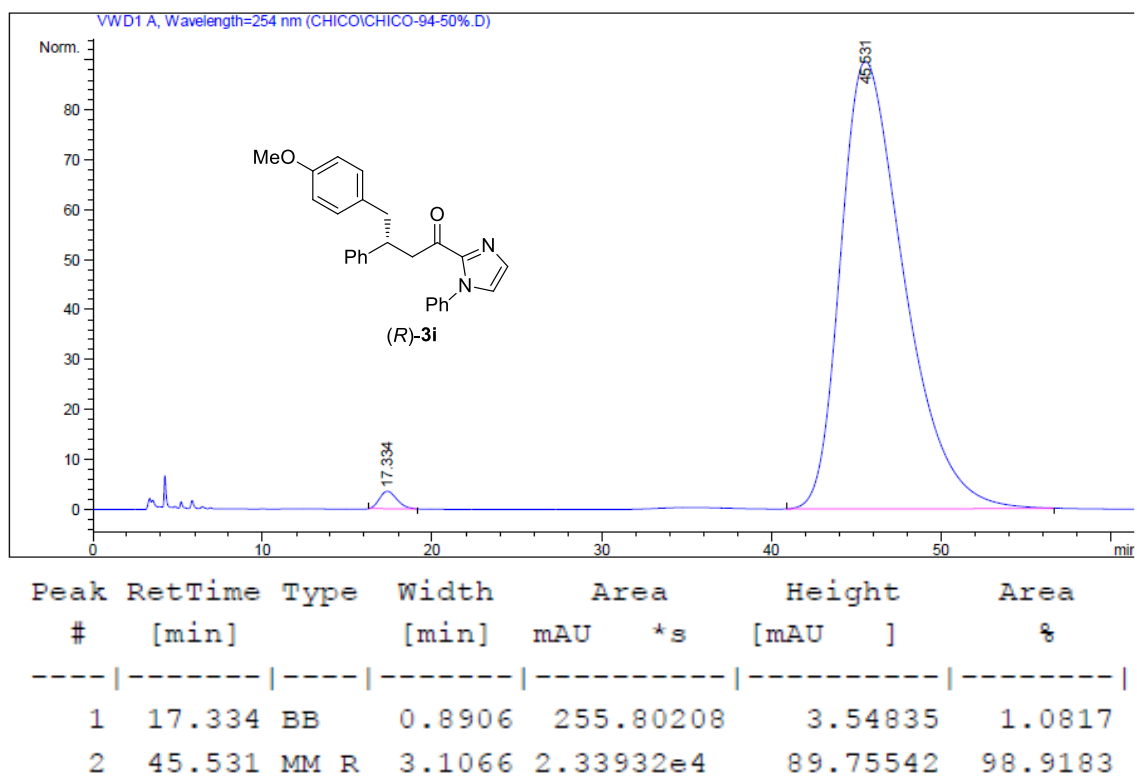

**Figure S12.** HPLC trace of (R)-3i.

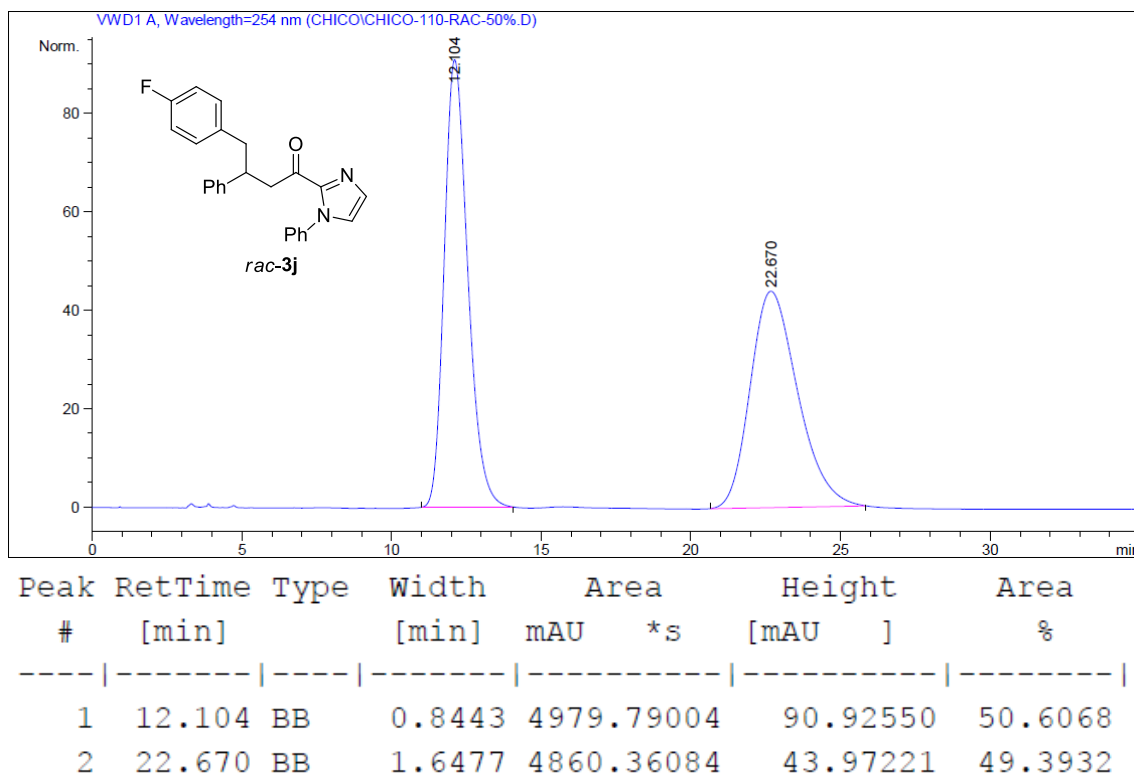

**Figure S13.** HPLC trace of *rac*-3j.

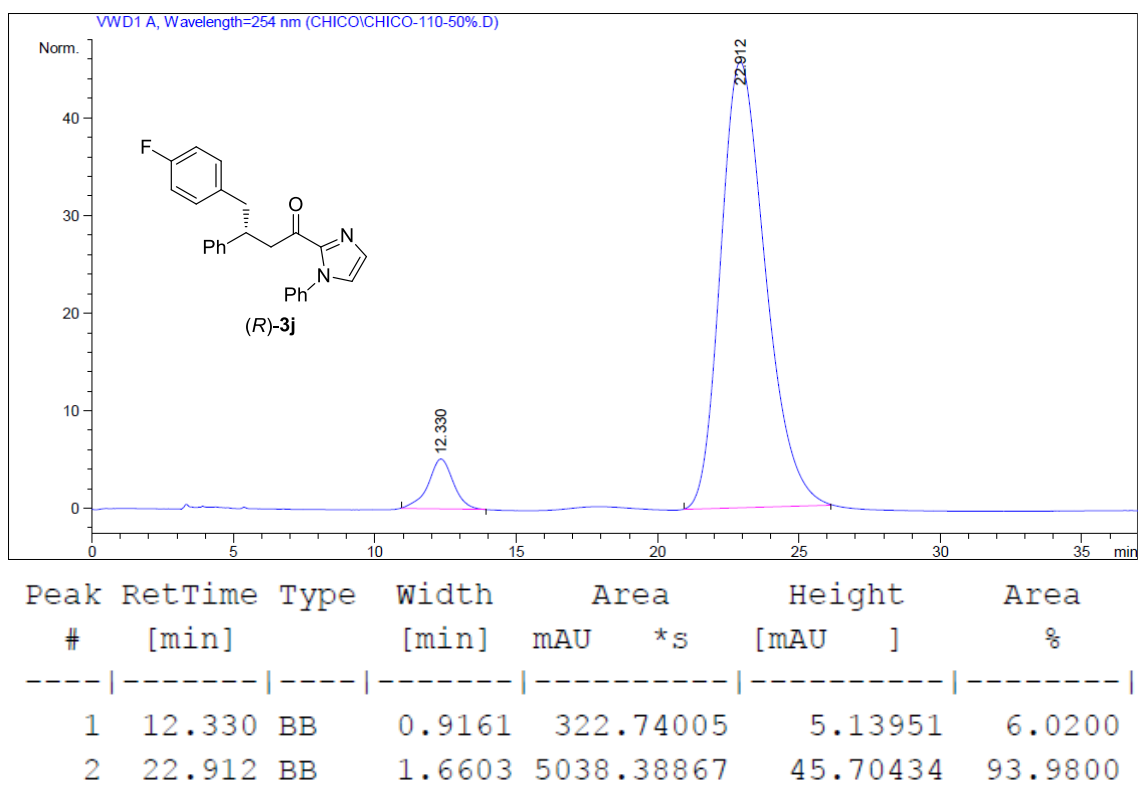

**Figure S14.** HPLC trace of (*R*)-3j.

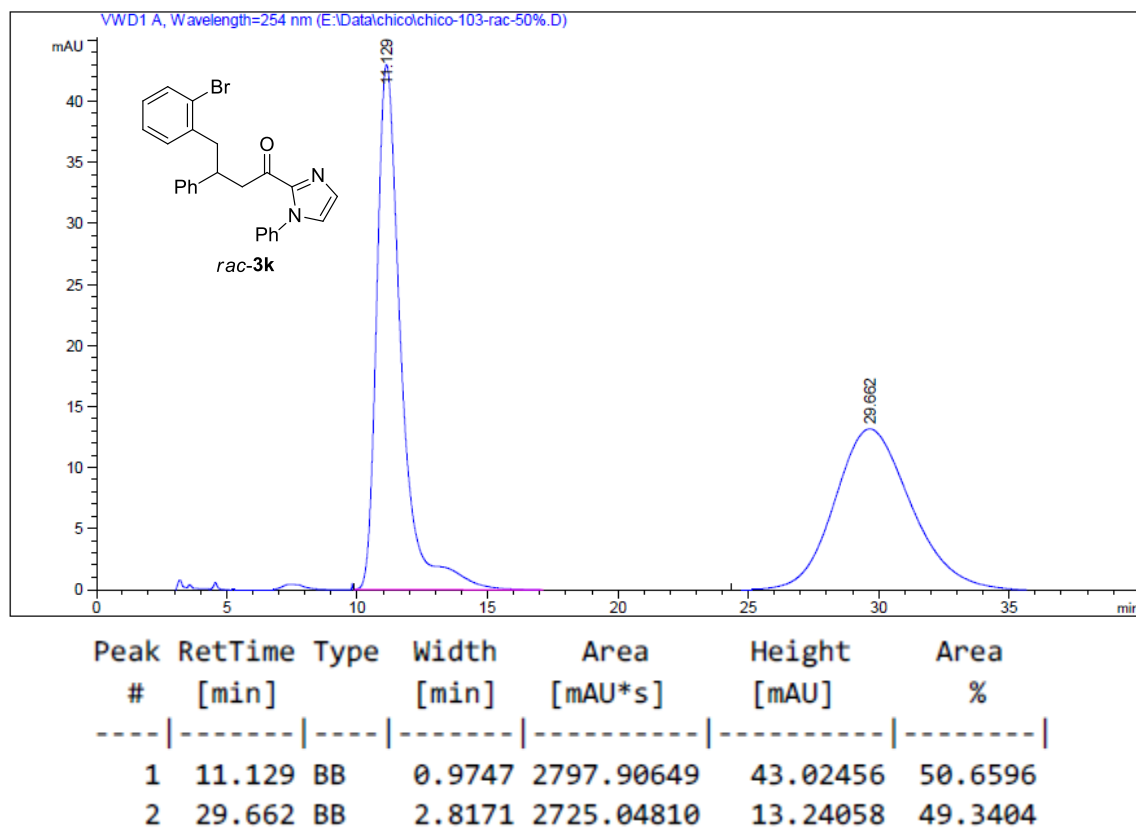

Figure S15. HPLC trace of *rac*-3k.

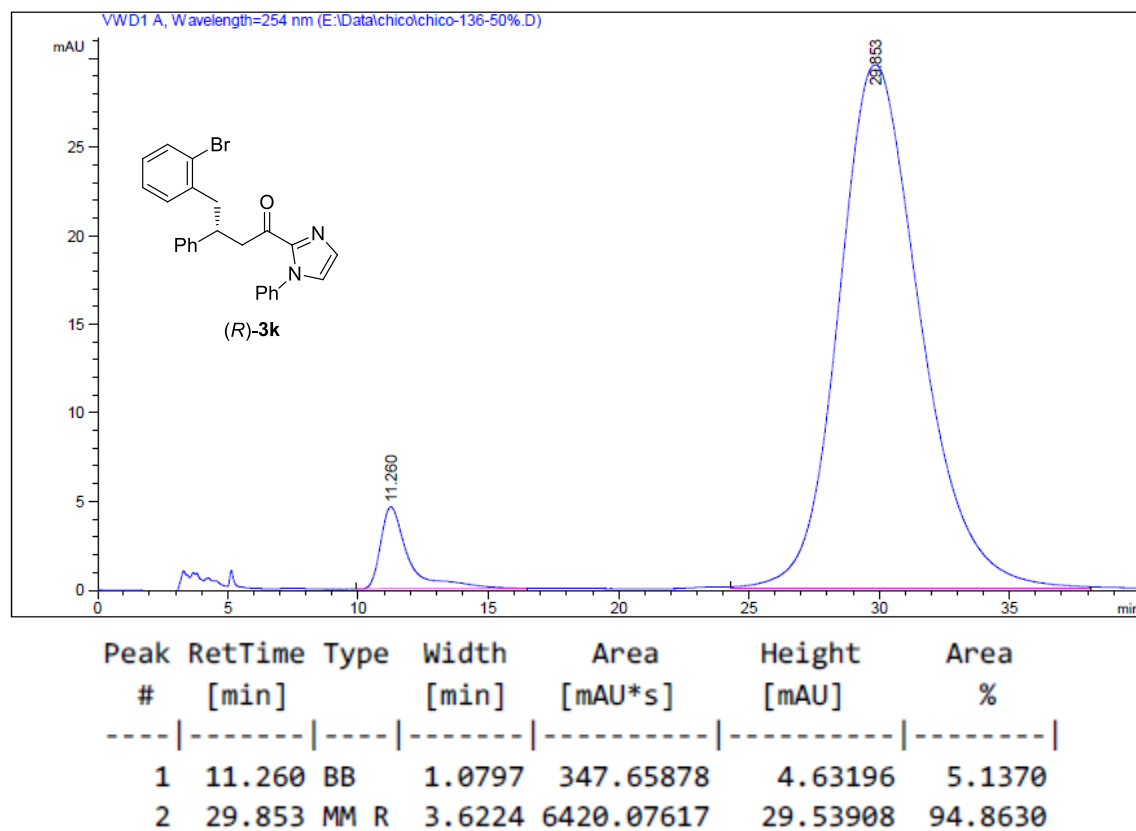

Figure S16. HPLC trace of (*R*)-3k.

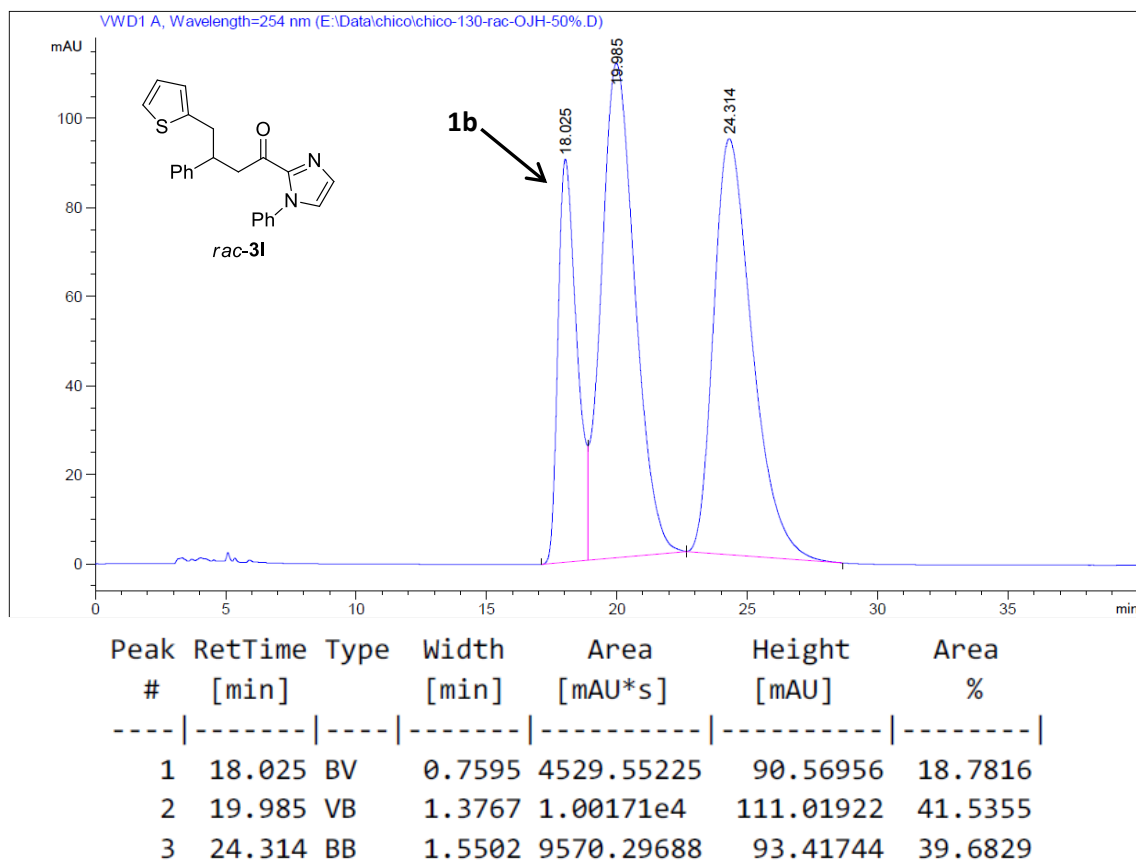

Figure S17. HPLC trace of *rac*-3I.

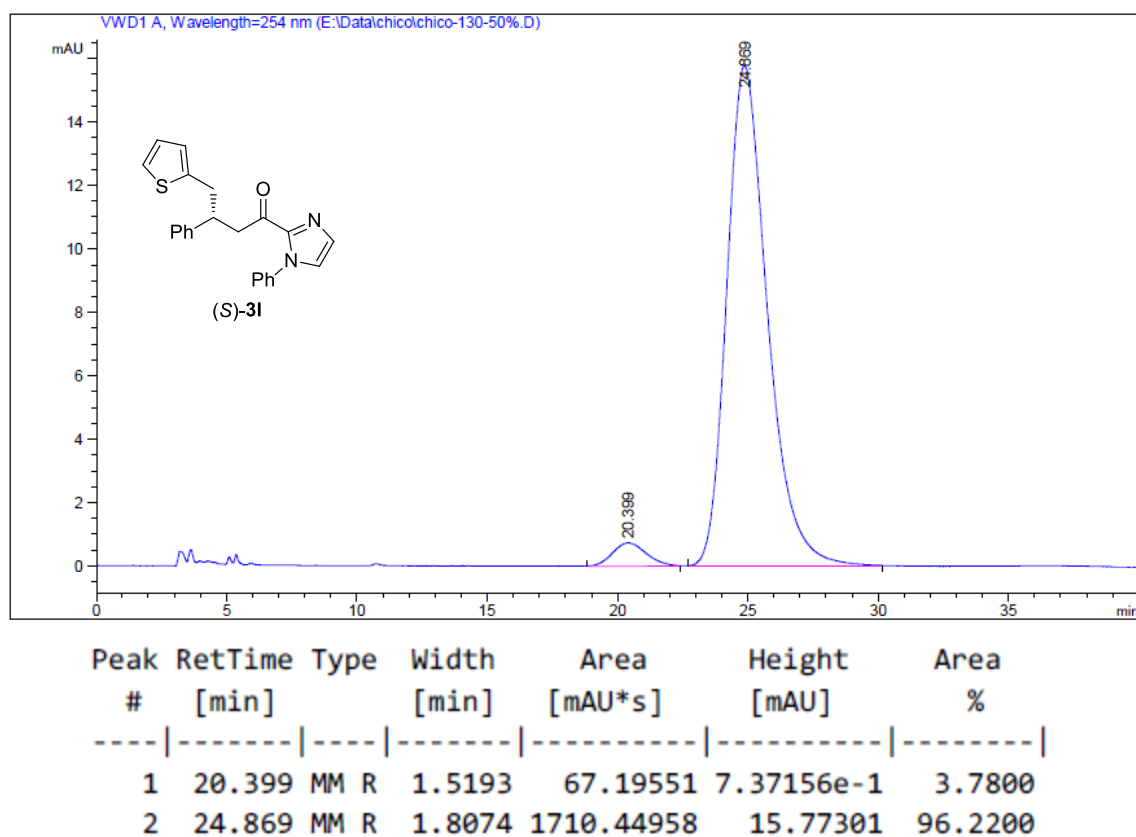

Figure S18. HPLC trace of (*S*)-3I.

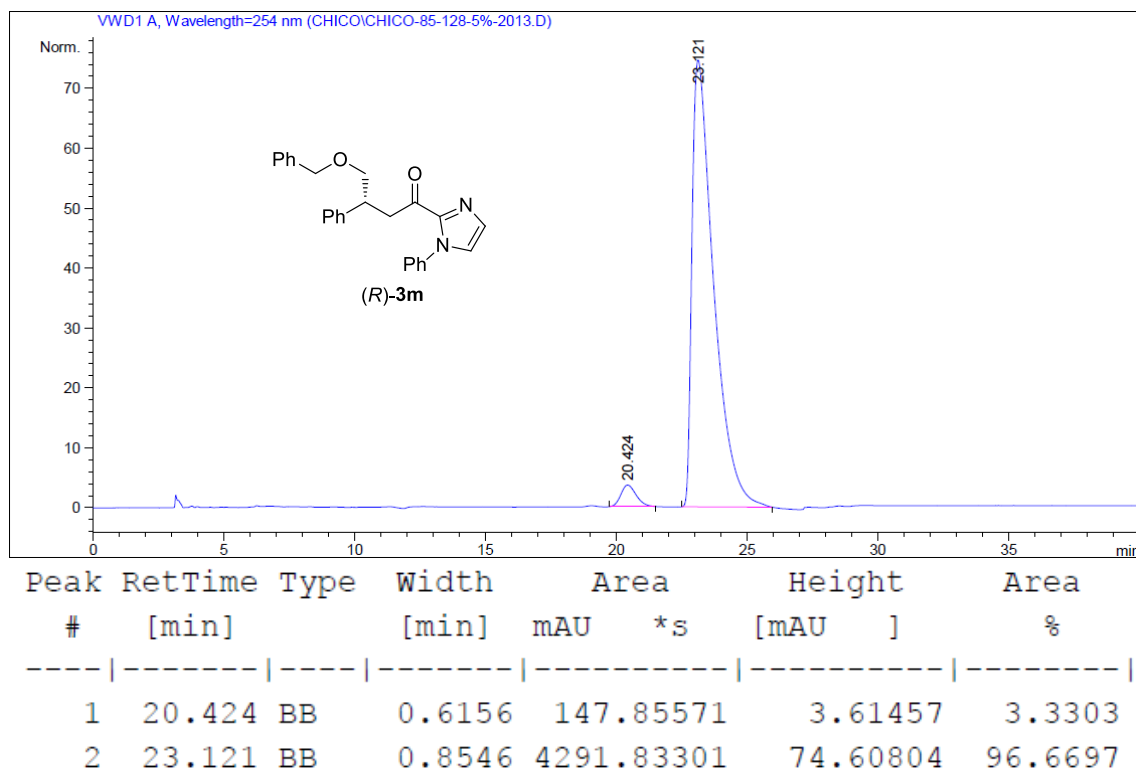

**Figure S19.** HPLC trace of (R)-3m.

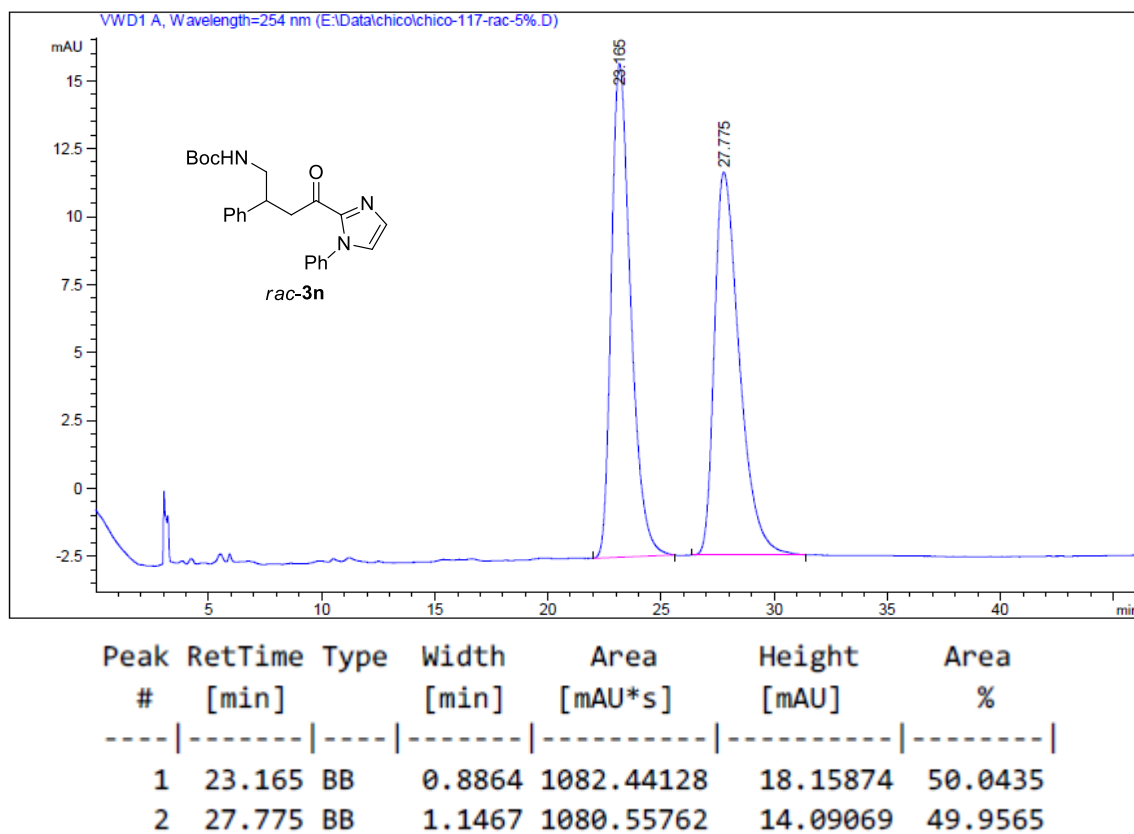

Figure S20. HPLC trace of *rac*-3n.

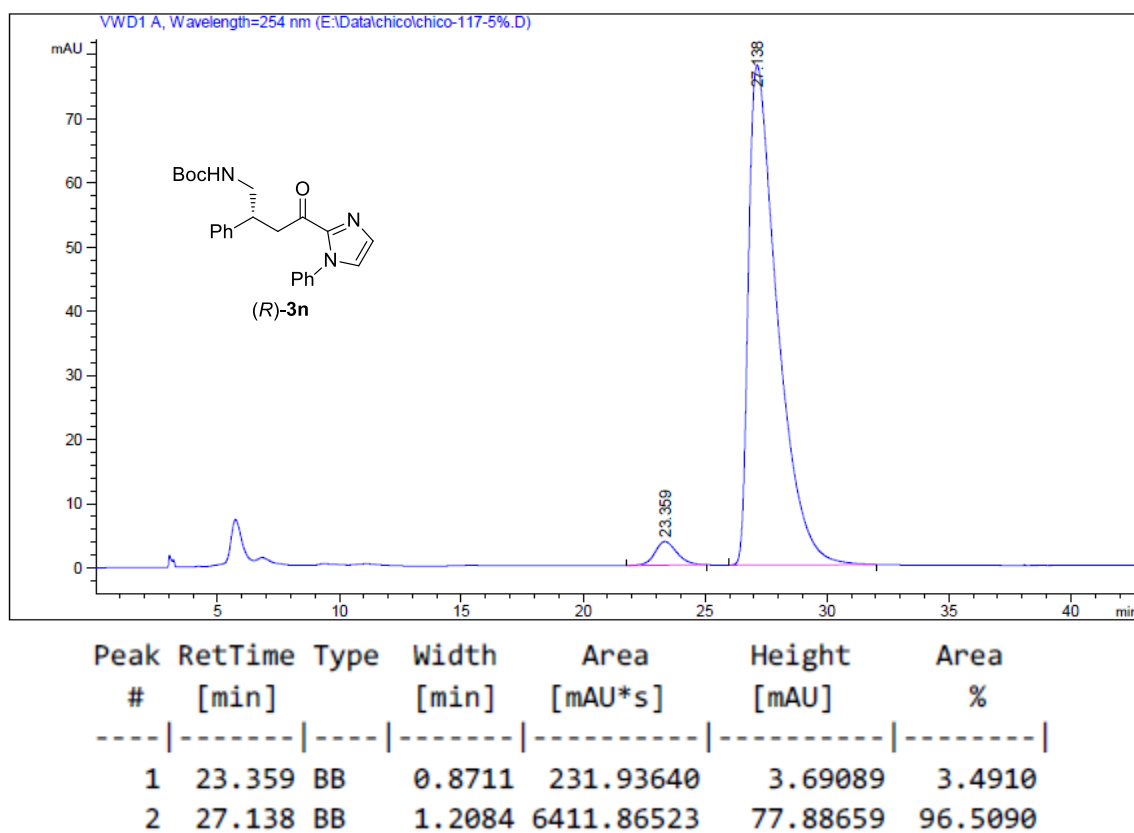

Figure S21. HPLC trace of (*R*)-3n.



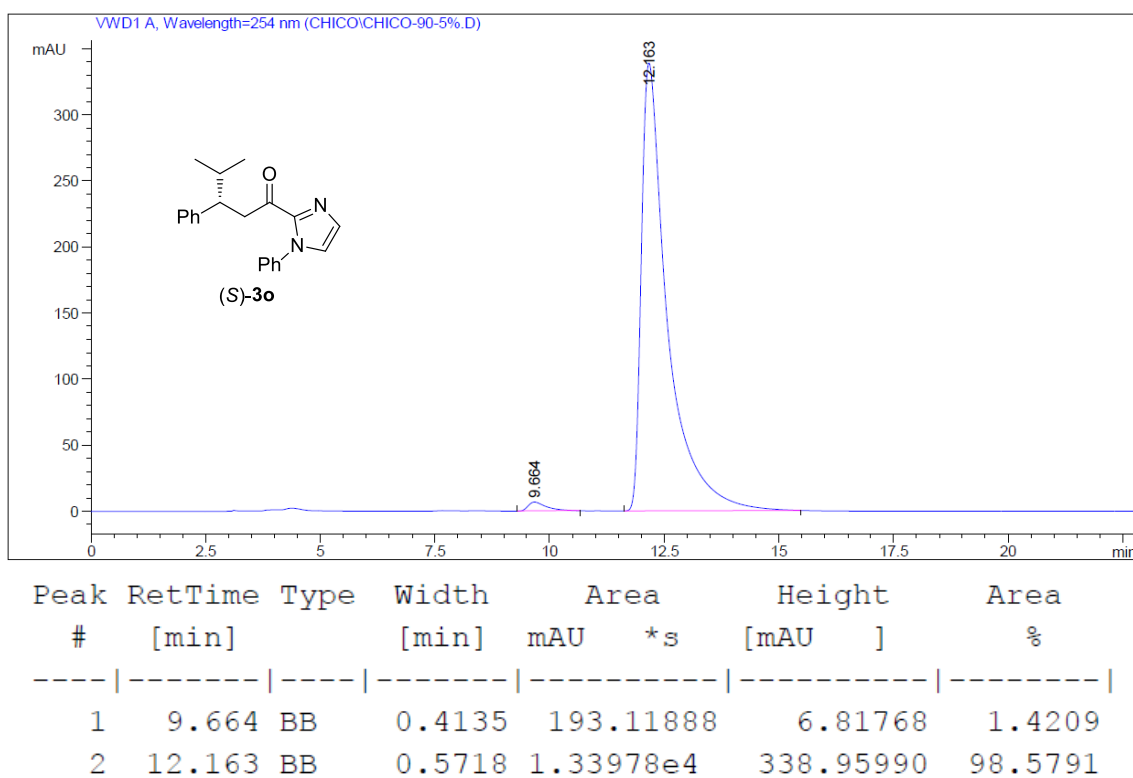

**Figure S22.** HPLC trace of (S)-3o.

### 3. NMR Spectra

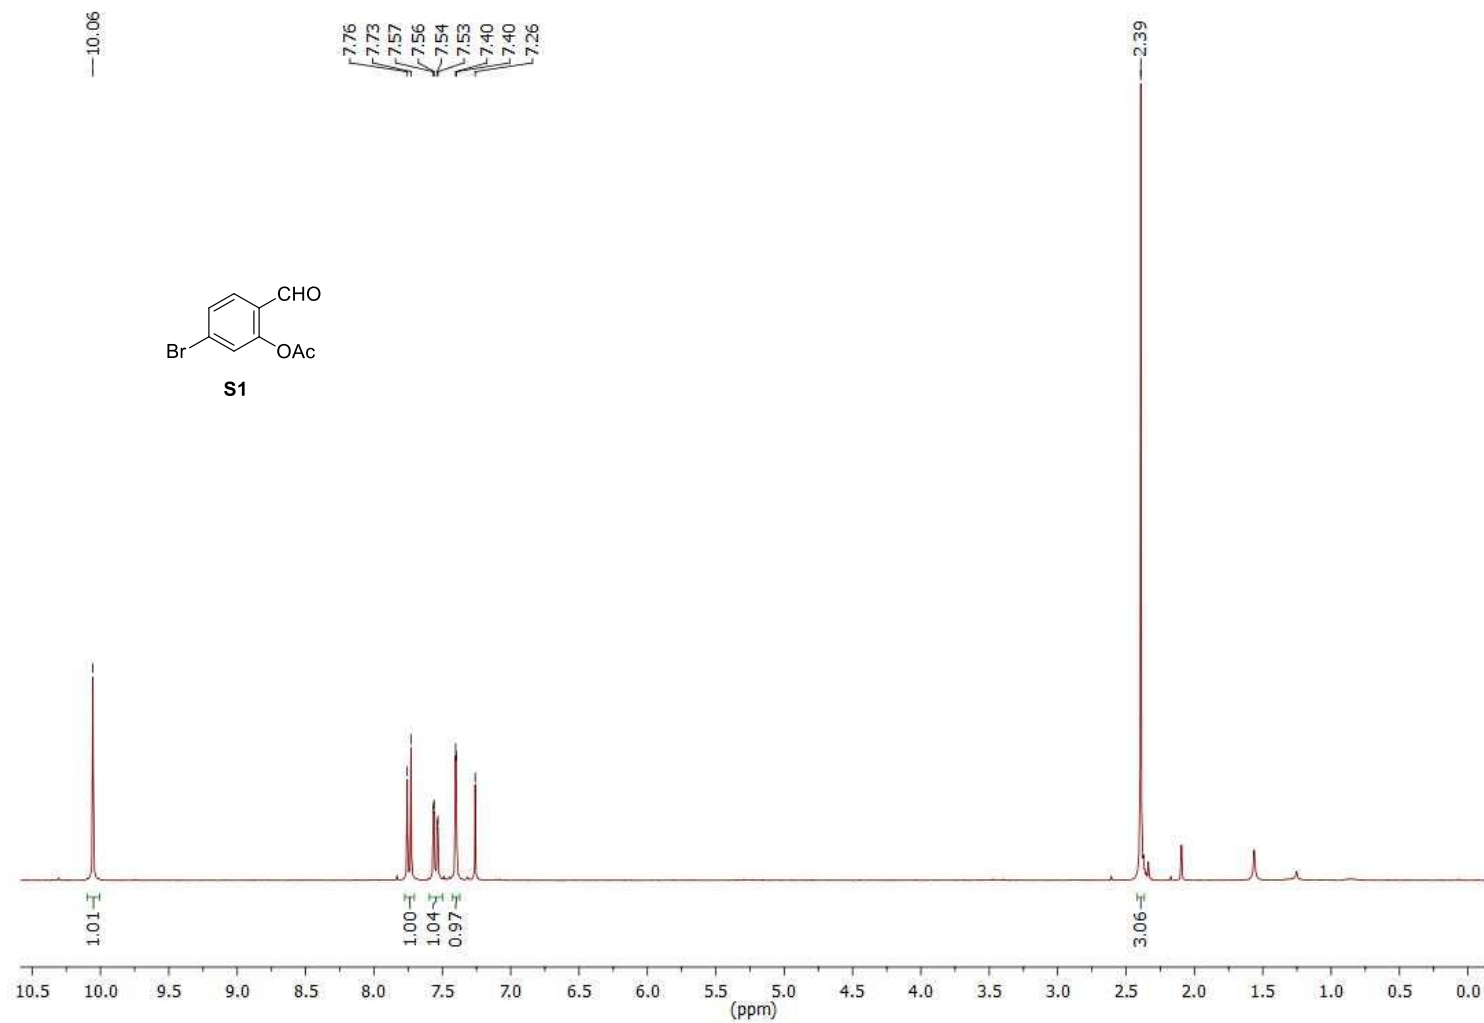

Figure S23. <sup>1</sup>H spectrum of S1.

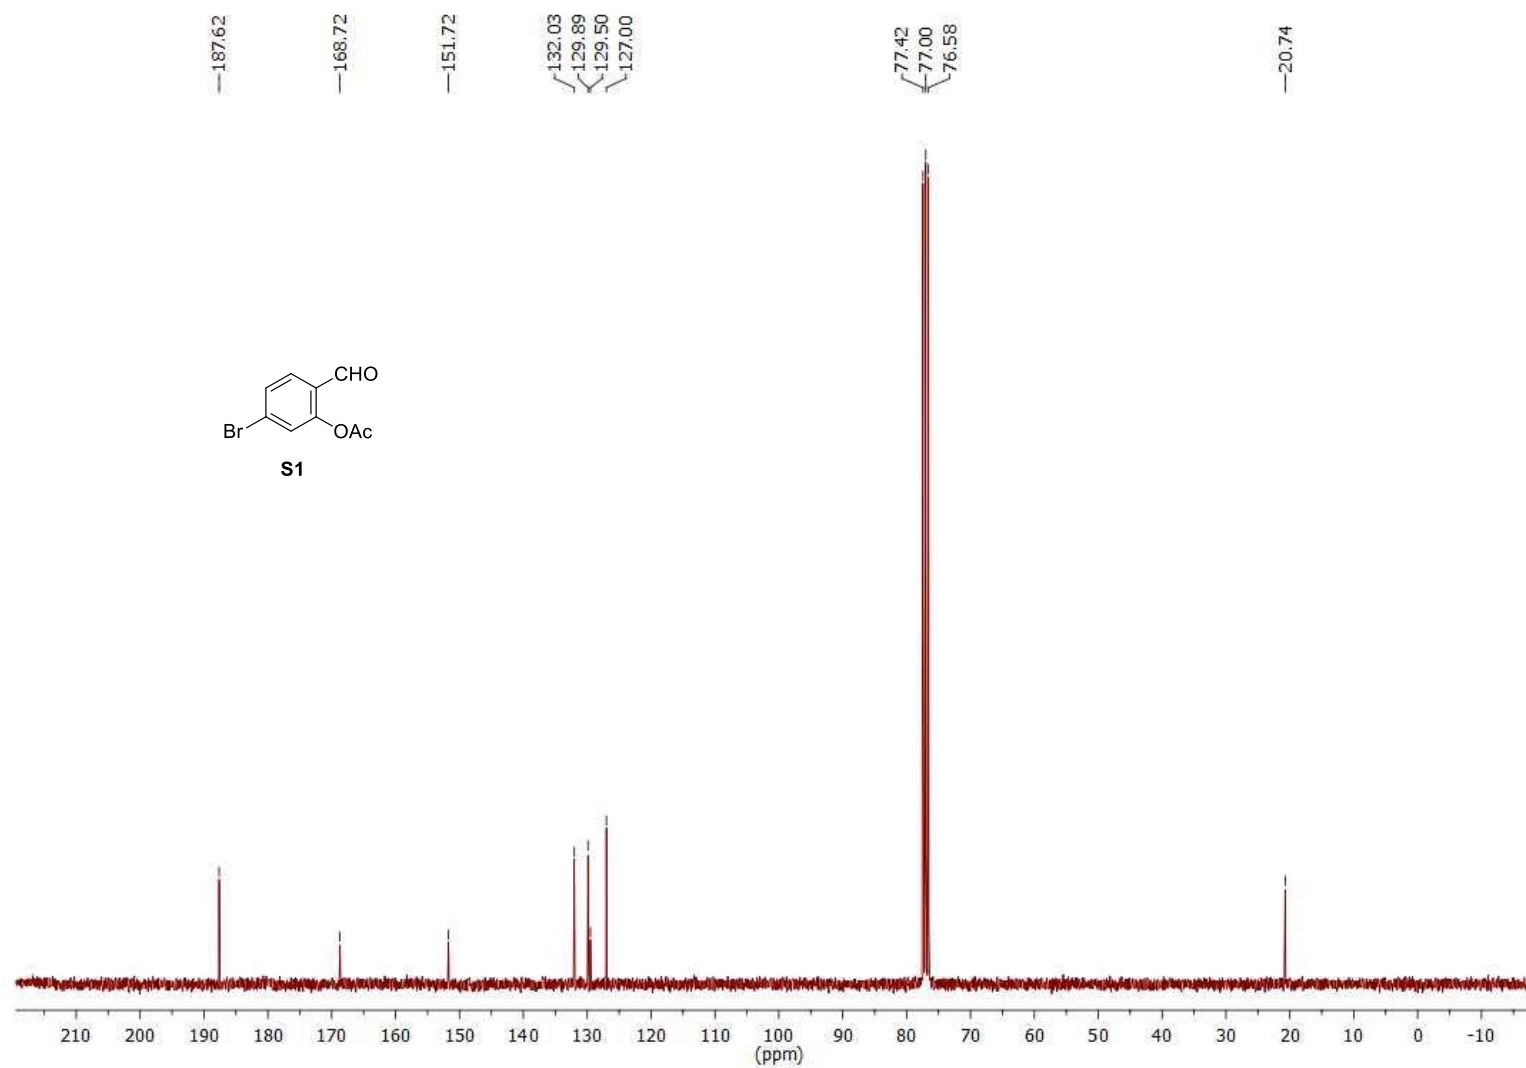

Figure S24. <sup>13</sup>C spectrum of **S1**.

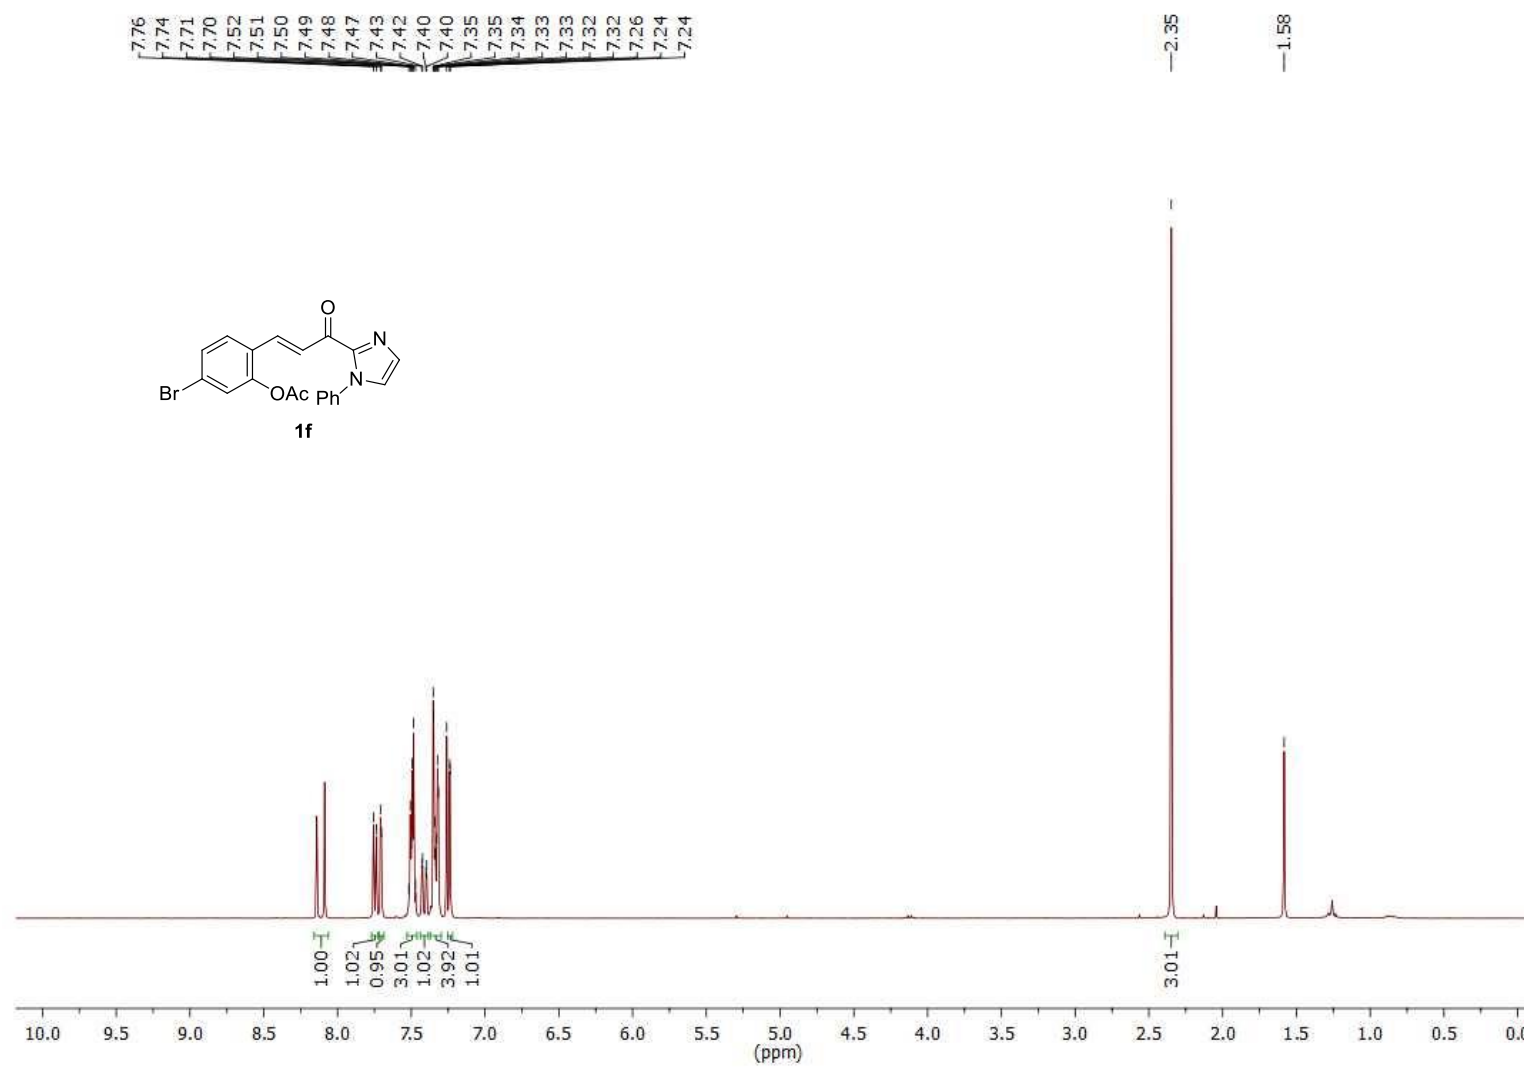

Figure S25. <sup>1</sup>H spectrum of **1f**.

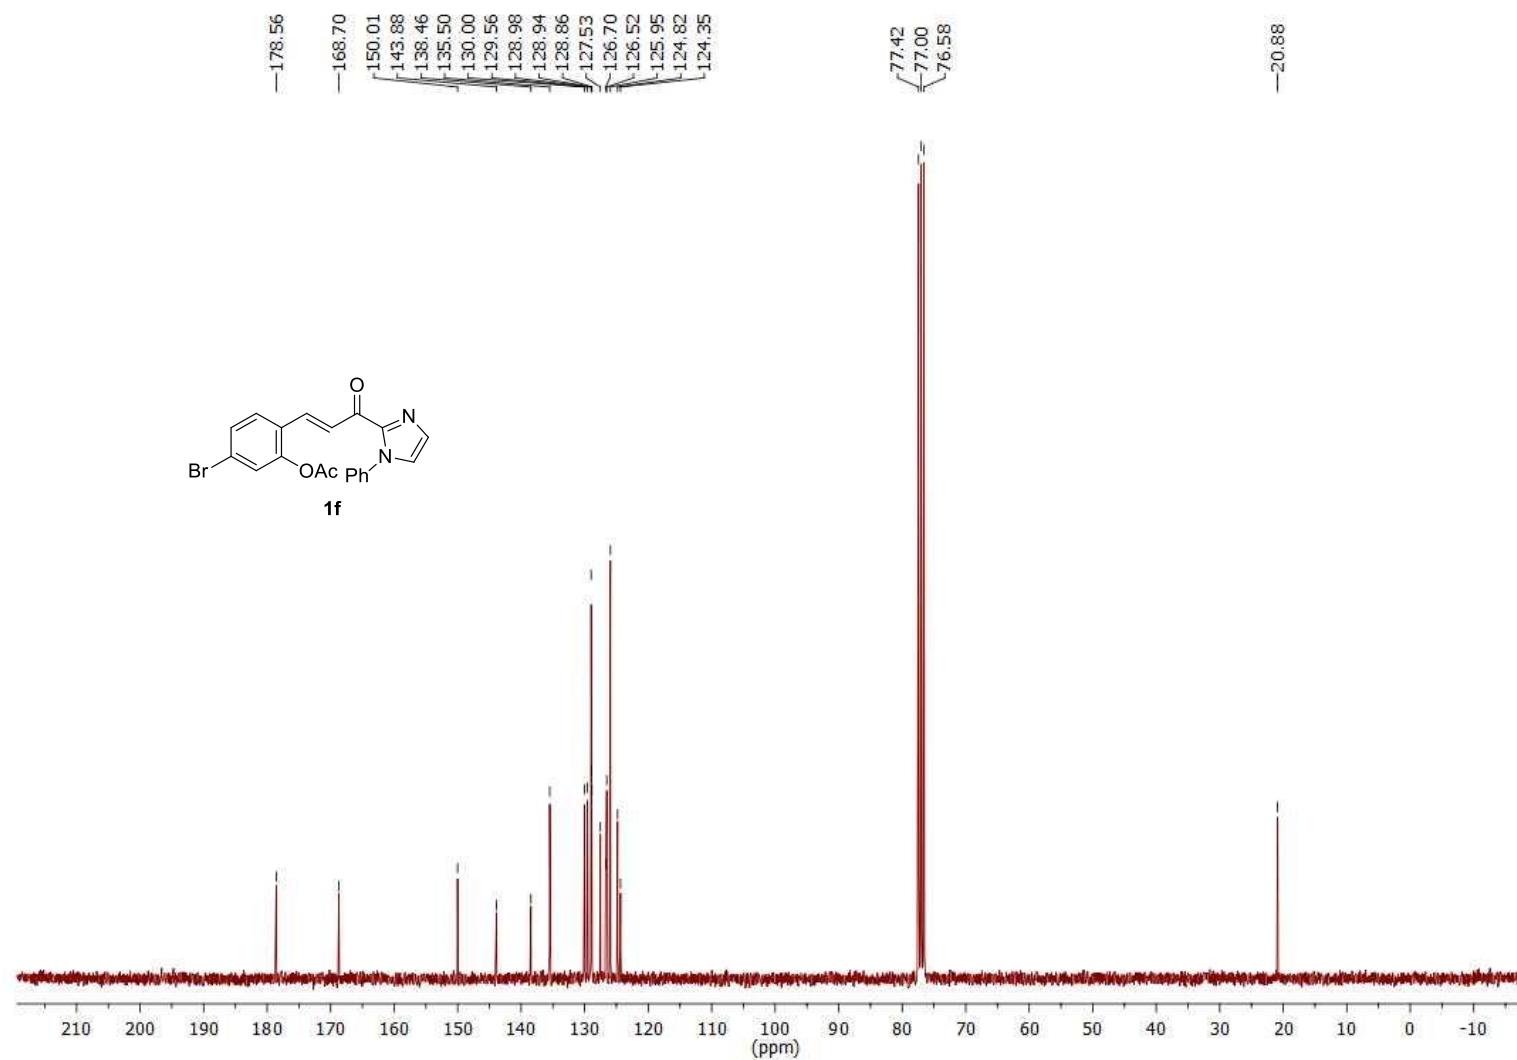

Figure S26.  $^{13}\text{C}$  spectrum of **1f**.

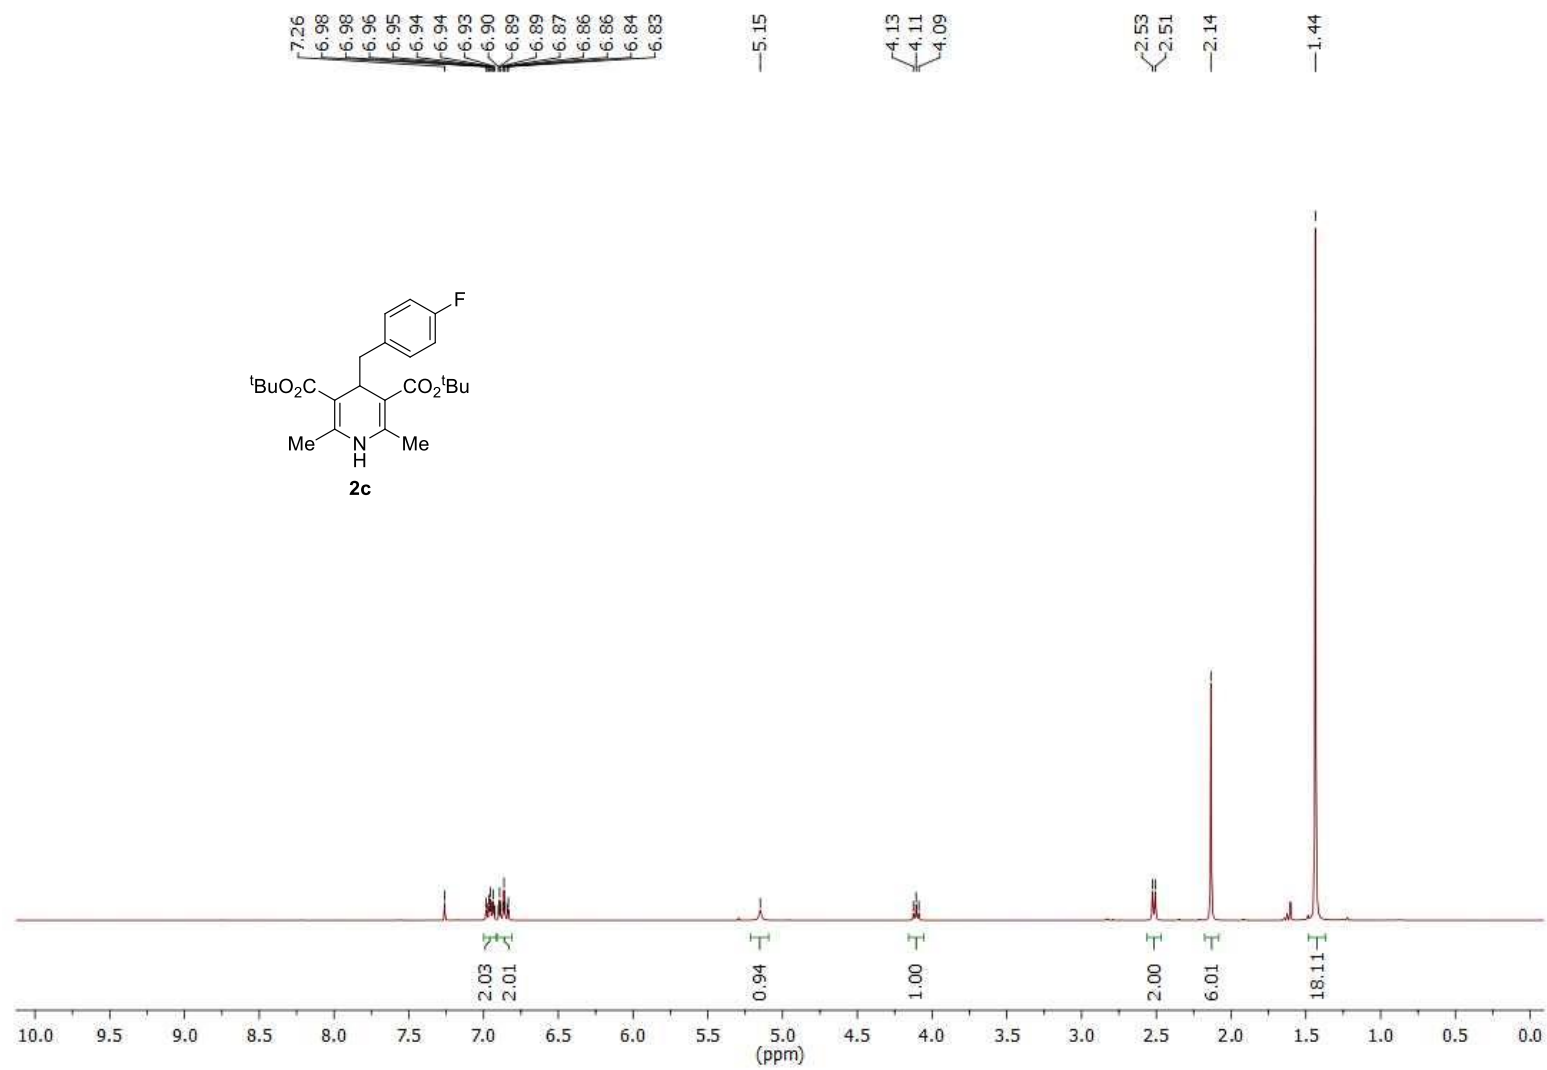

Figure S27. <sup>1</sup>H spectrum of **2c**.

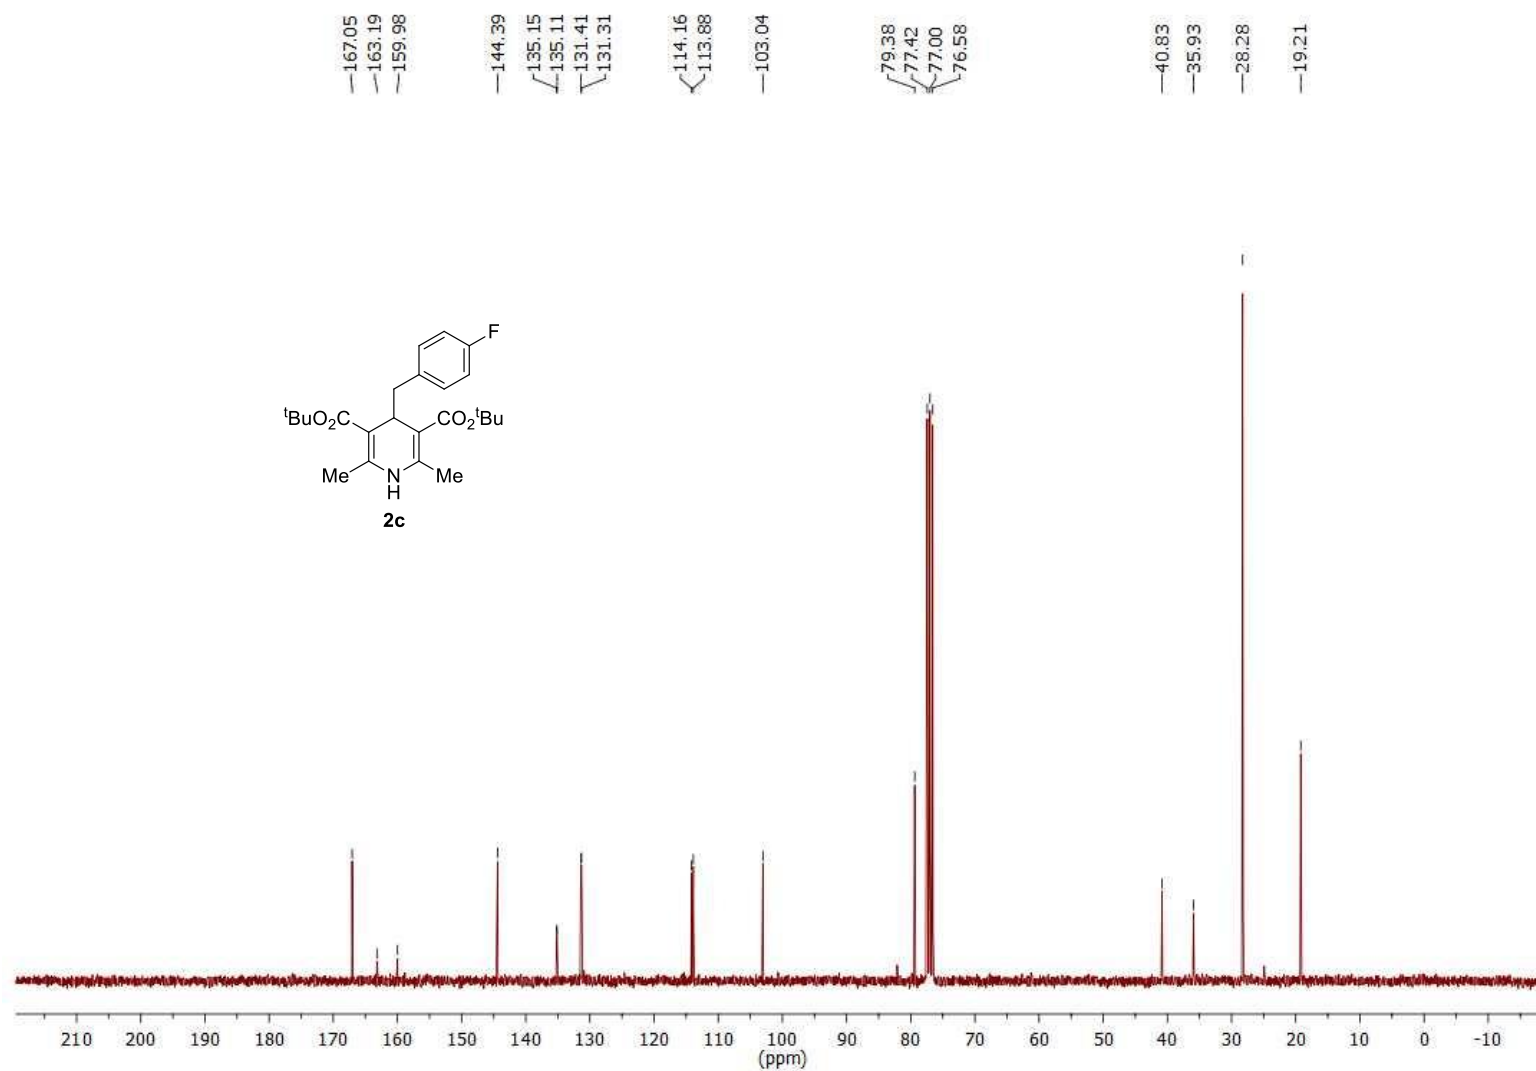

**Figure S28.** <sup>13</sup>C spectrum of **2c**.

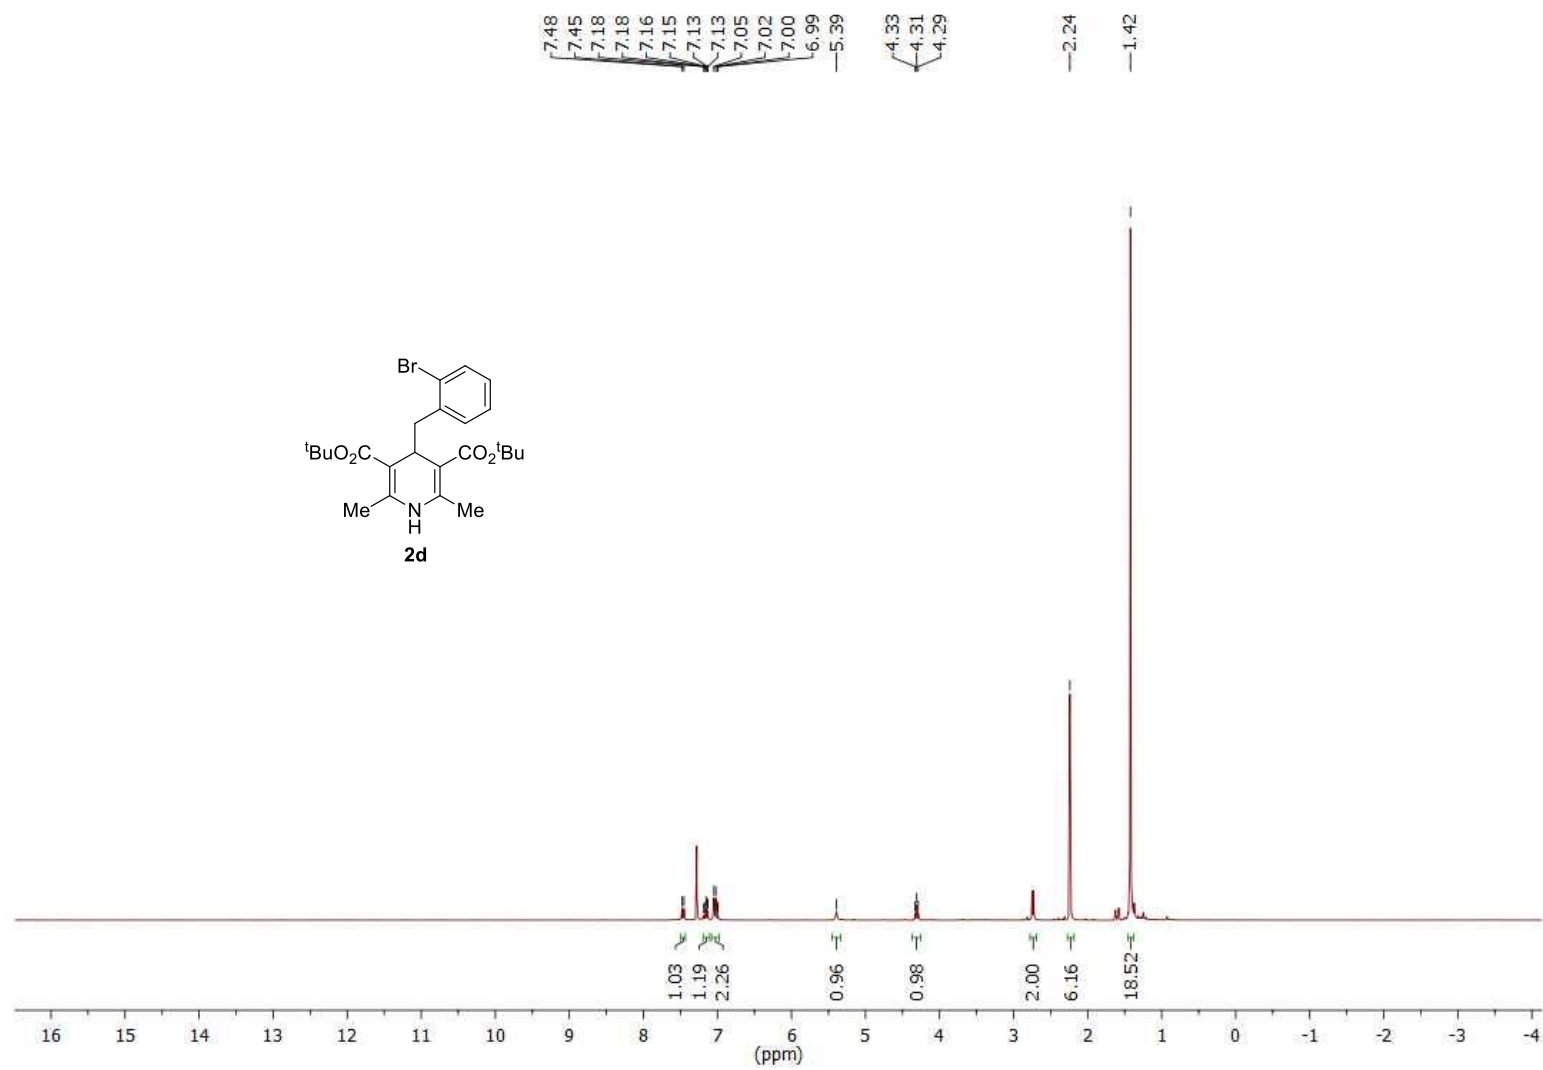

**Figure S29.** <sup>1</sup>H spectrum of **2d**.



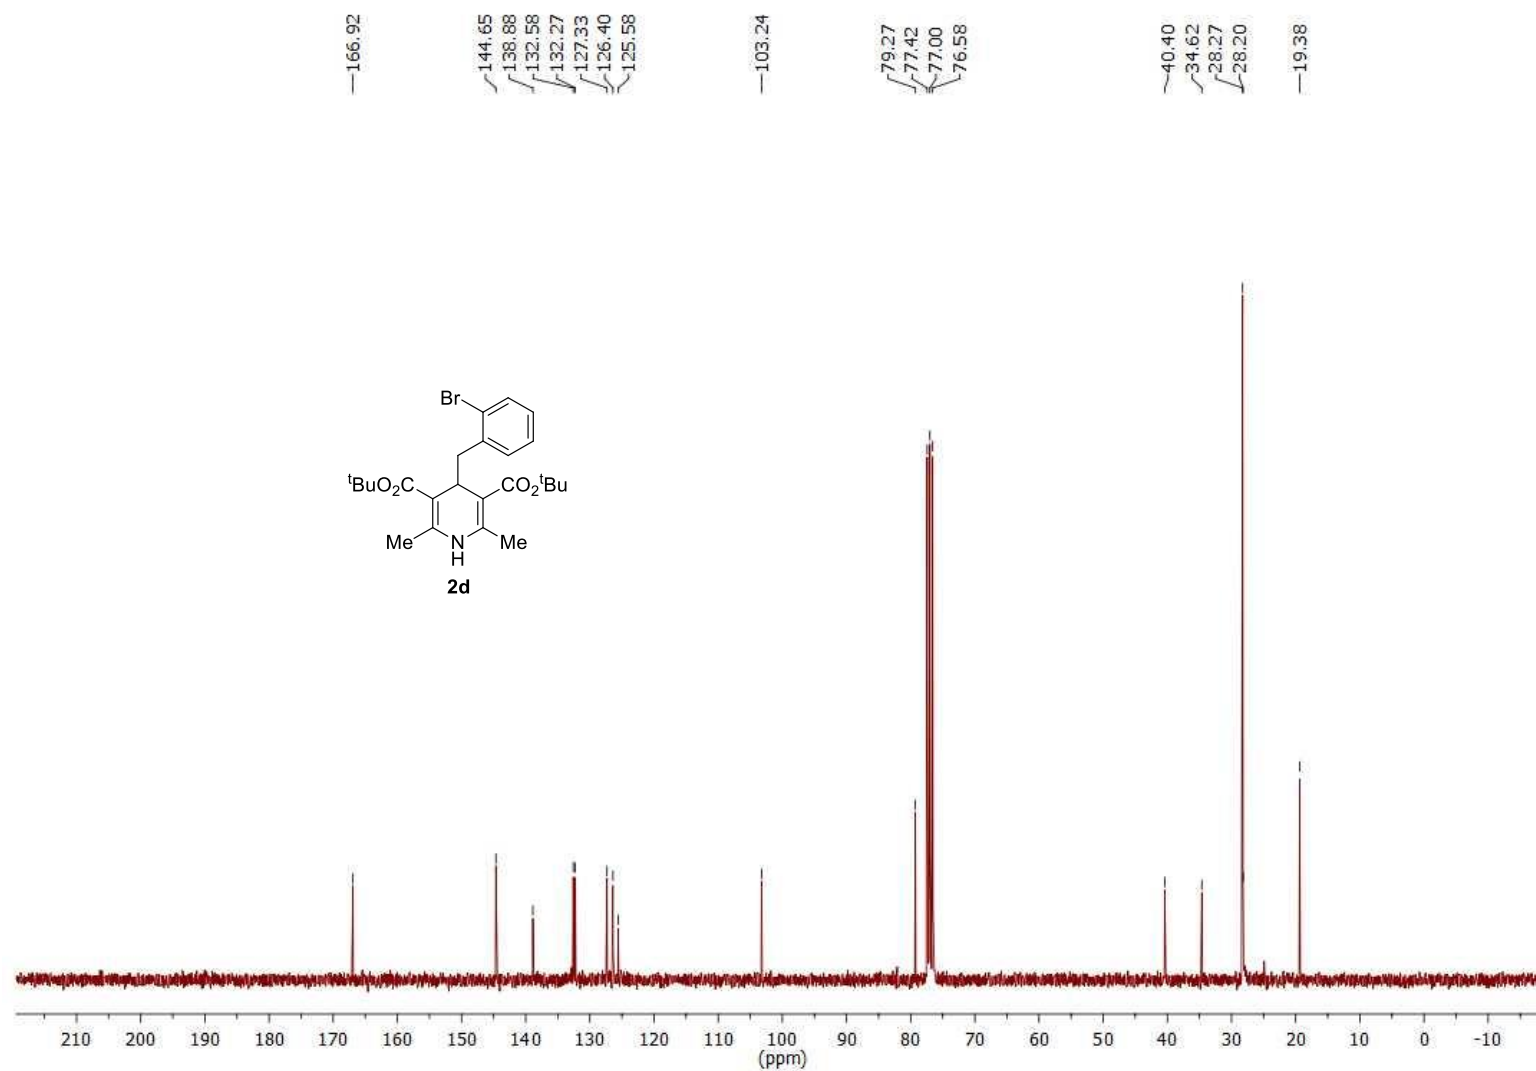

**Figure S30.** <sup>13</sup>C spectrum of **2d**.

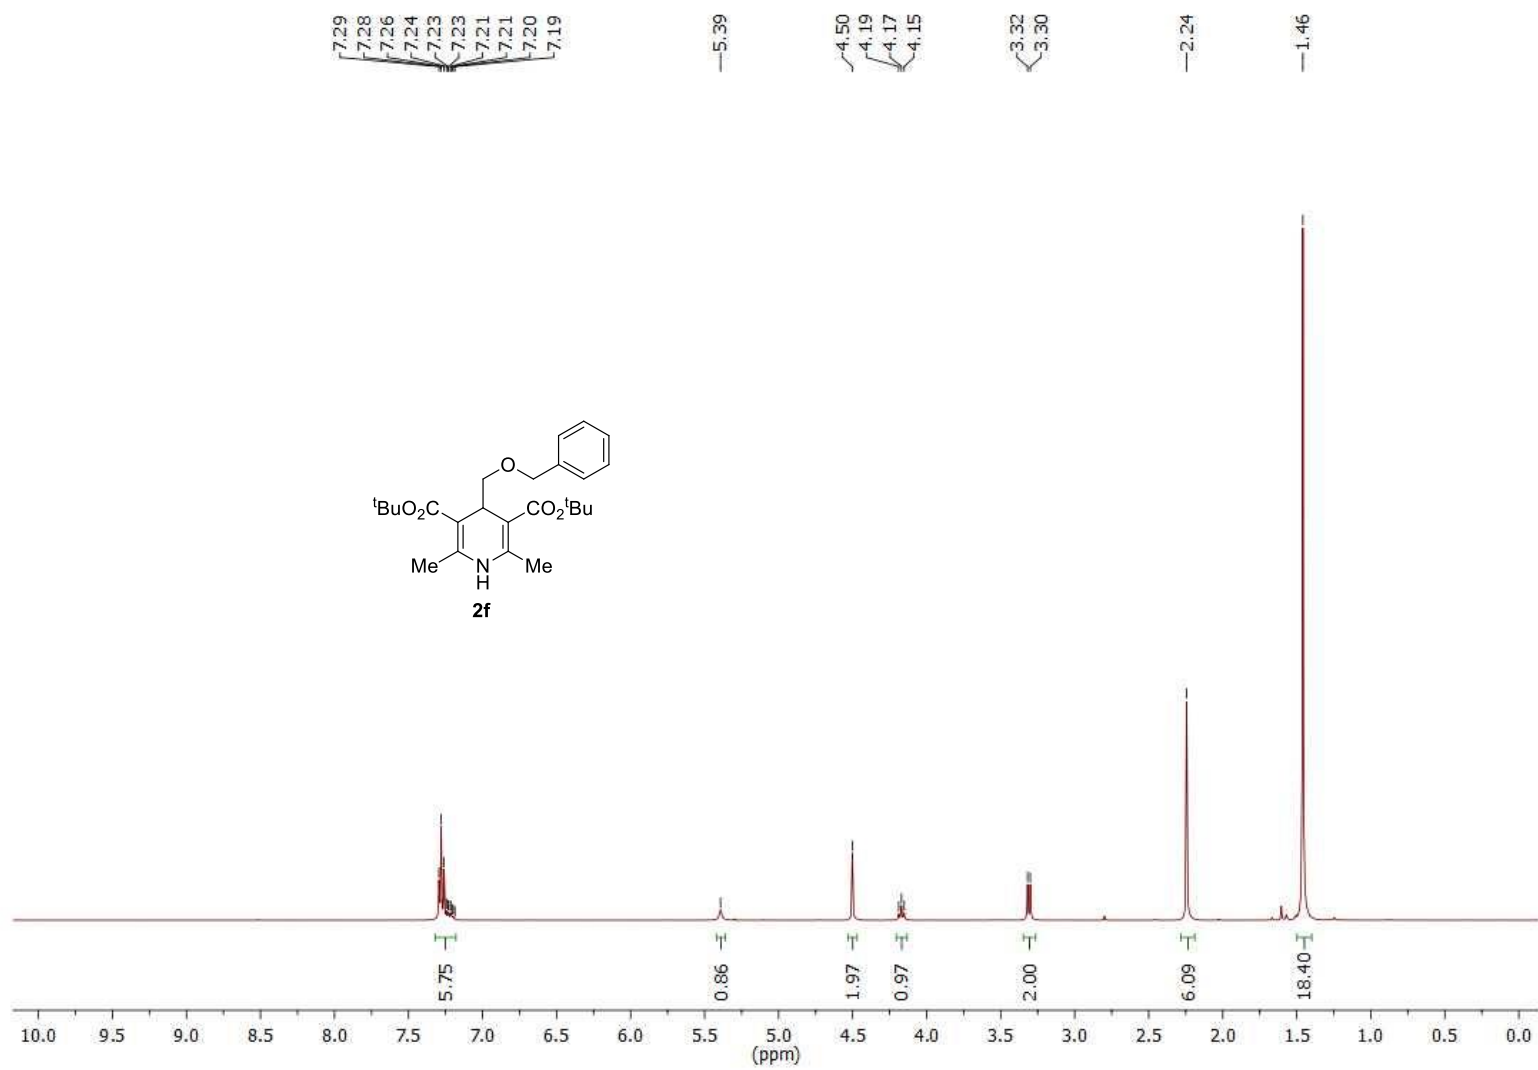

Figure S31. <sup>1</sup>H spectrum of **2f**.

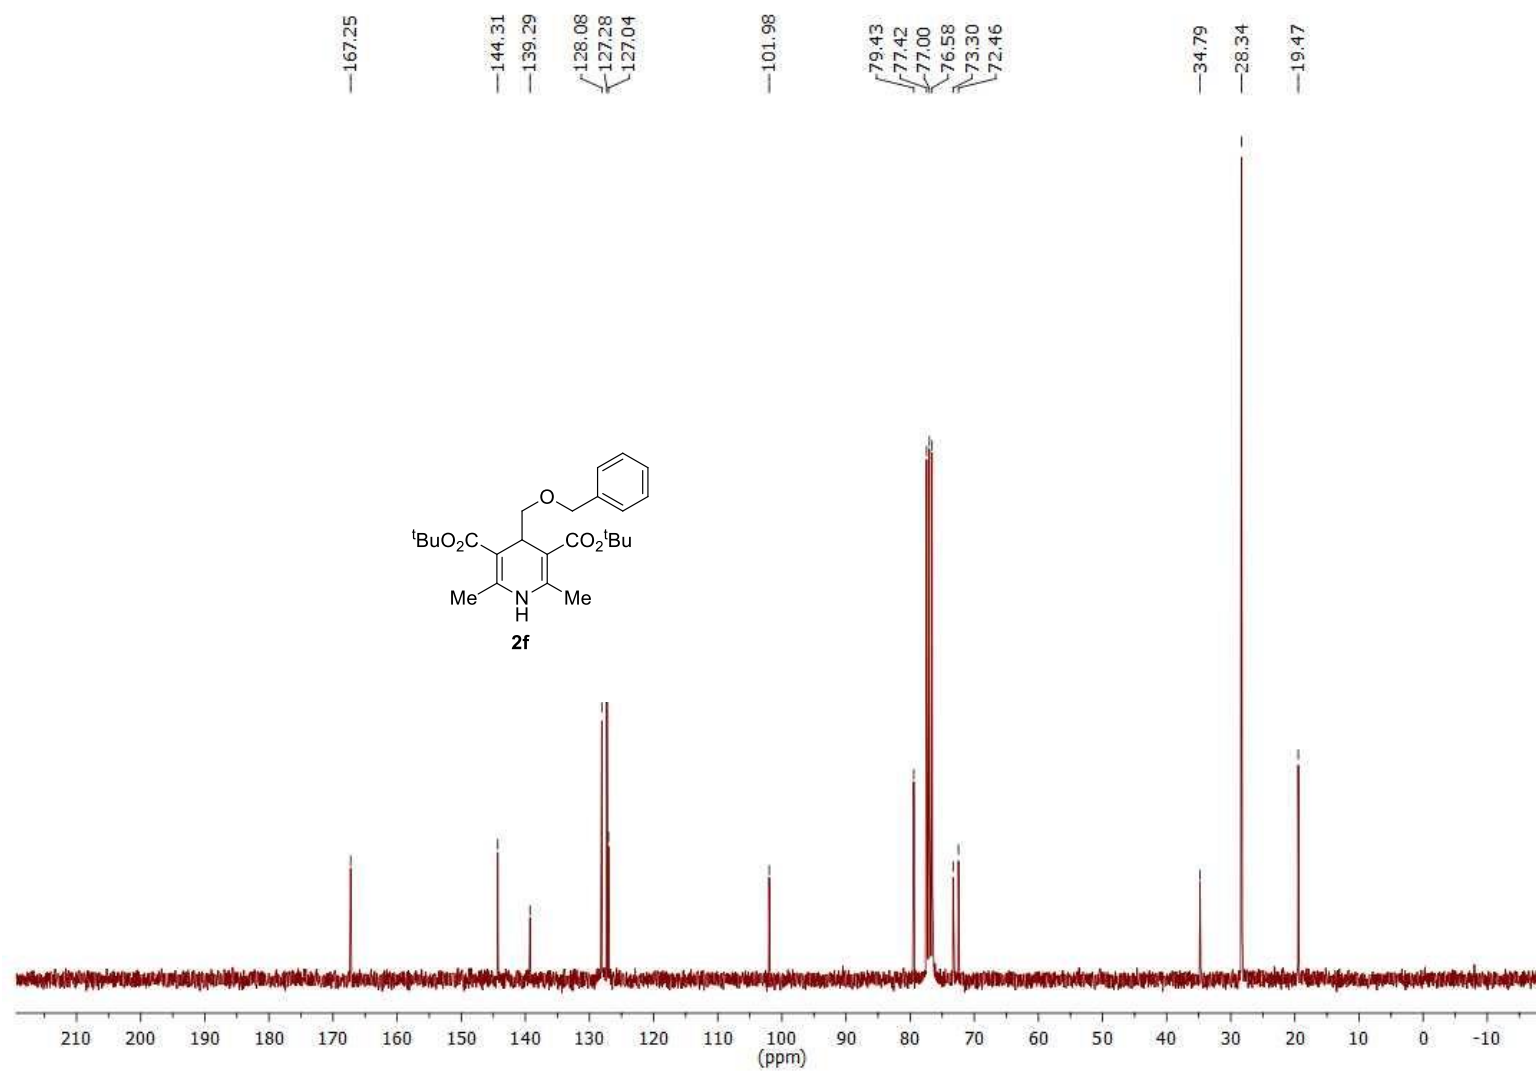

**Figure S32.** <sup>13</sup>C spectrum of **2f**.

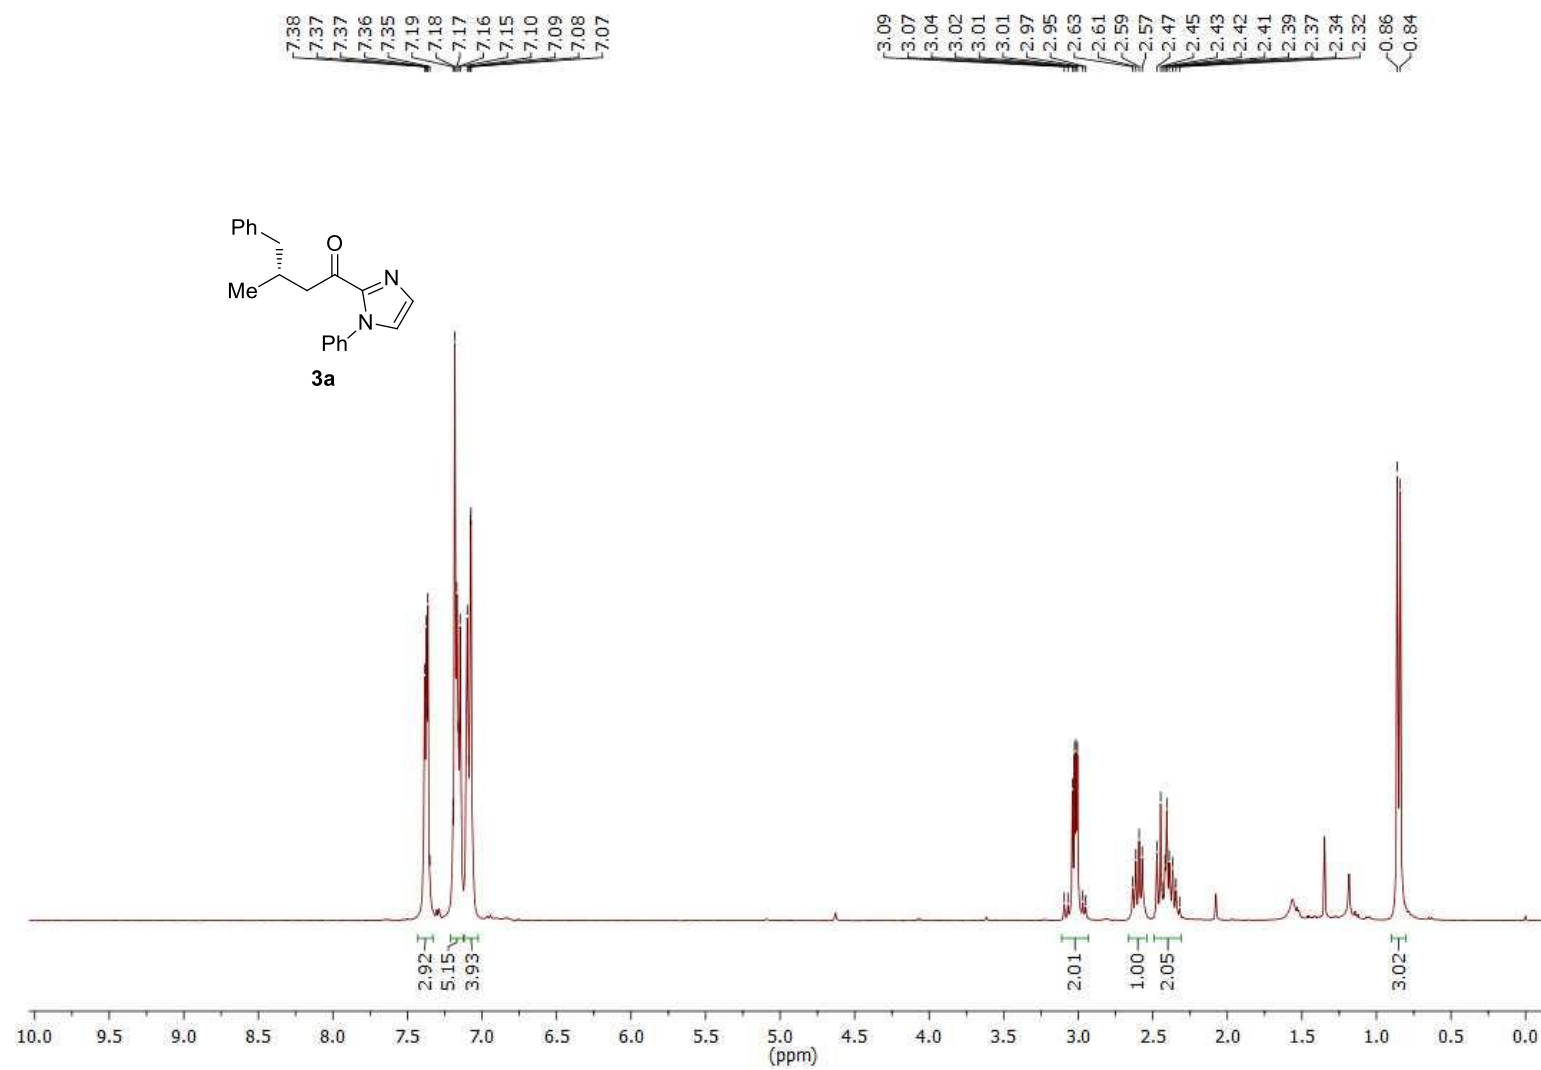

Figure S33. <sup>1</sup>H spectrum of **3a**.

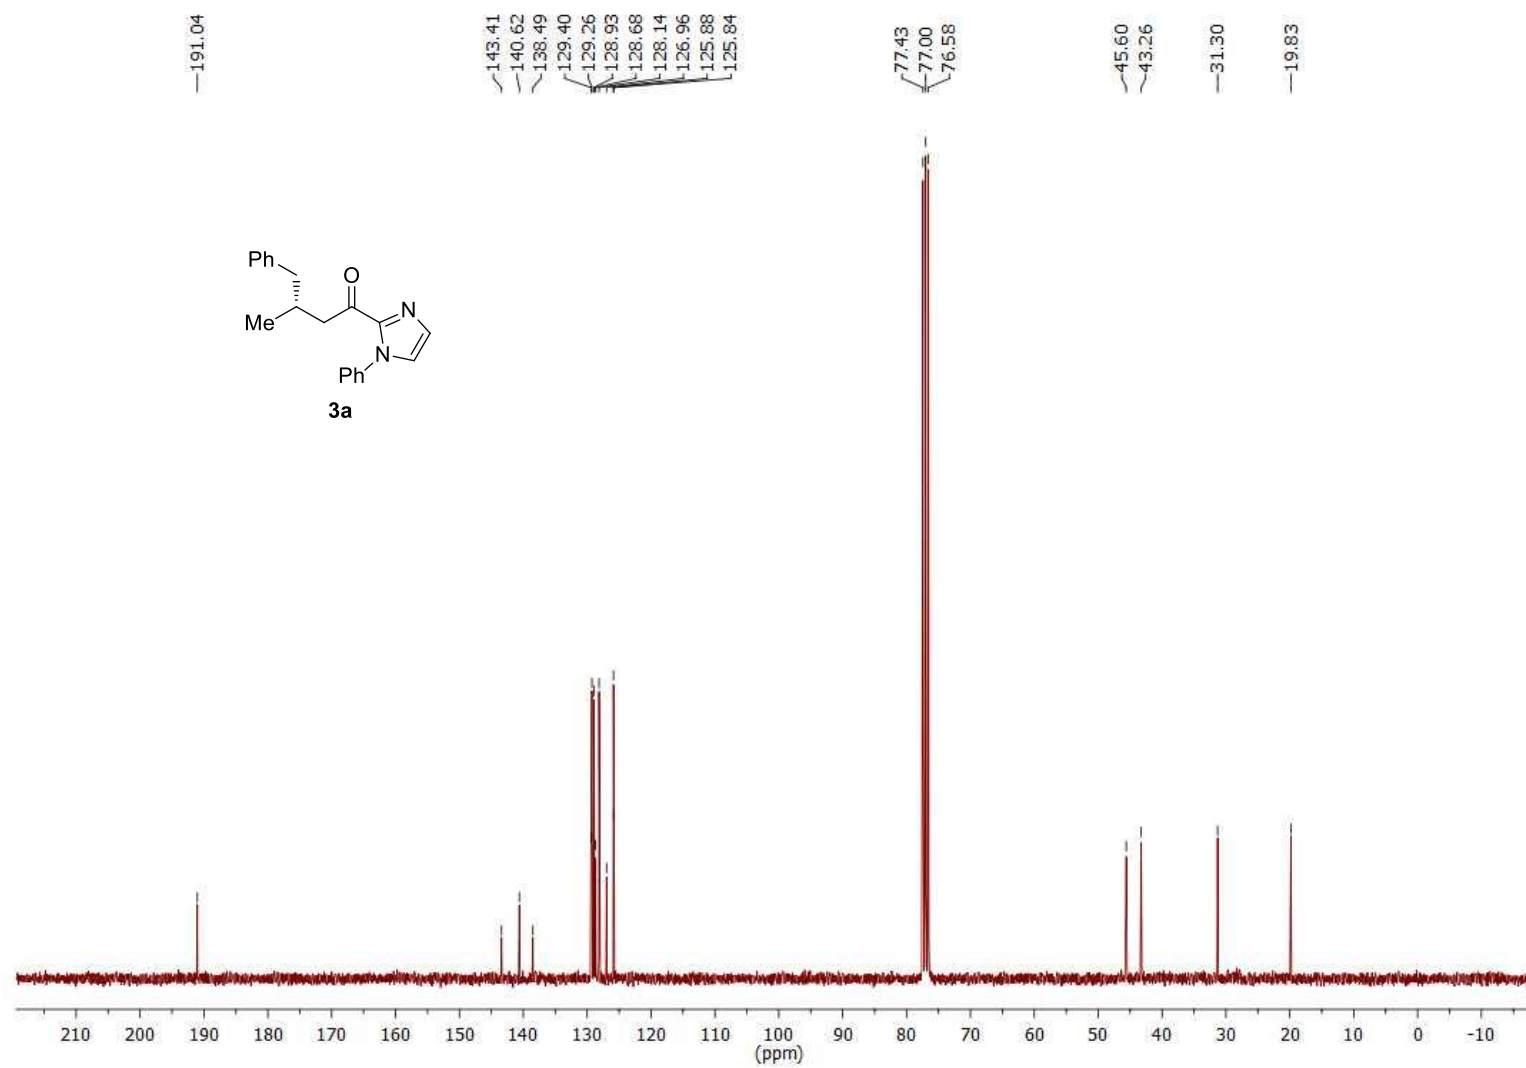

Figure S34. <sup>13</sup>C spectrum of **3a**.

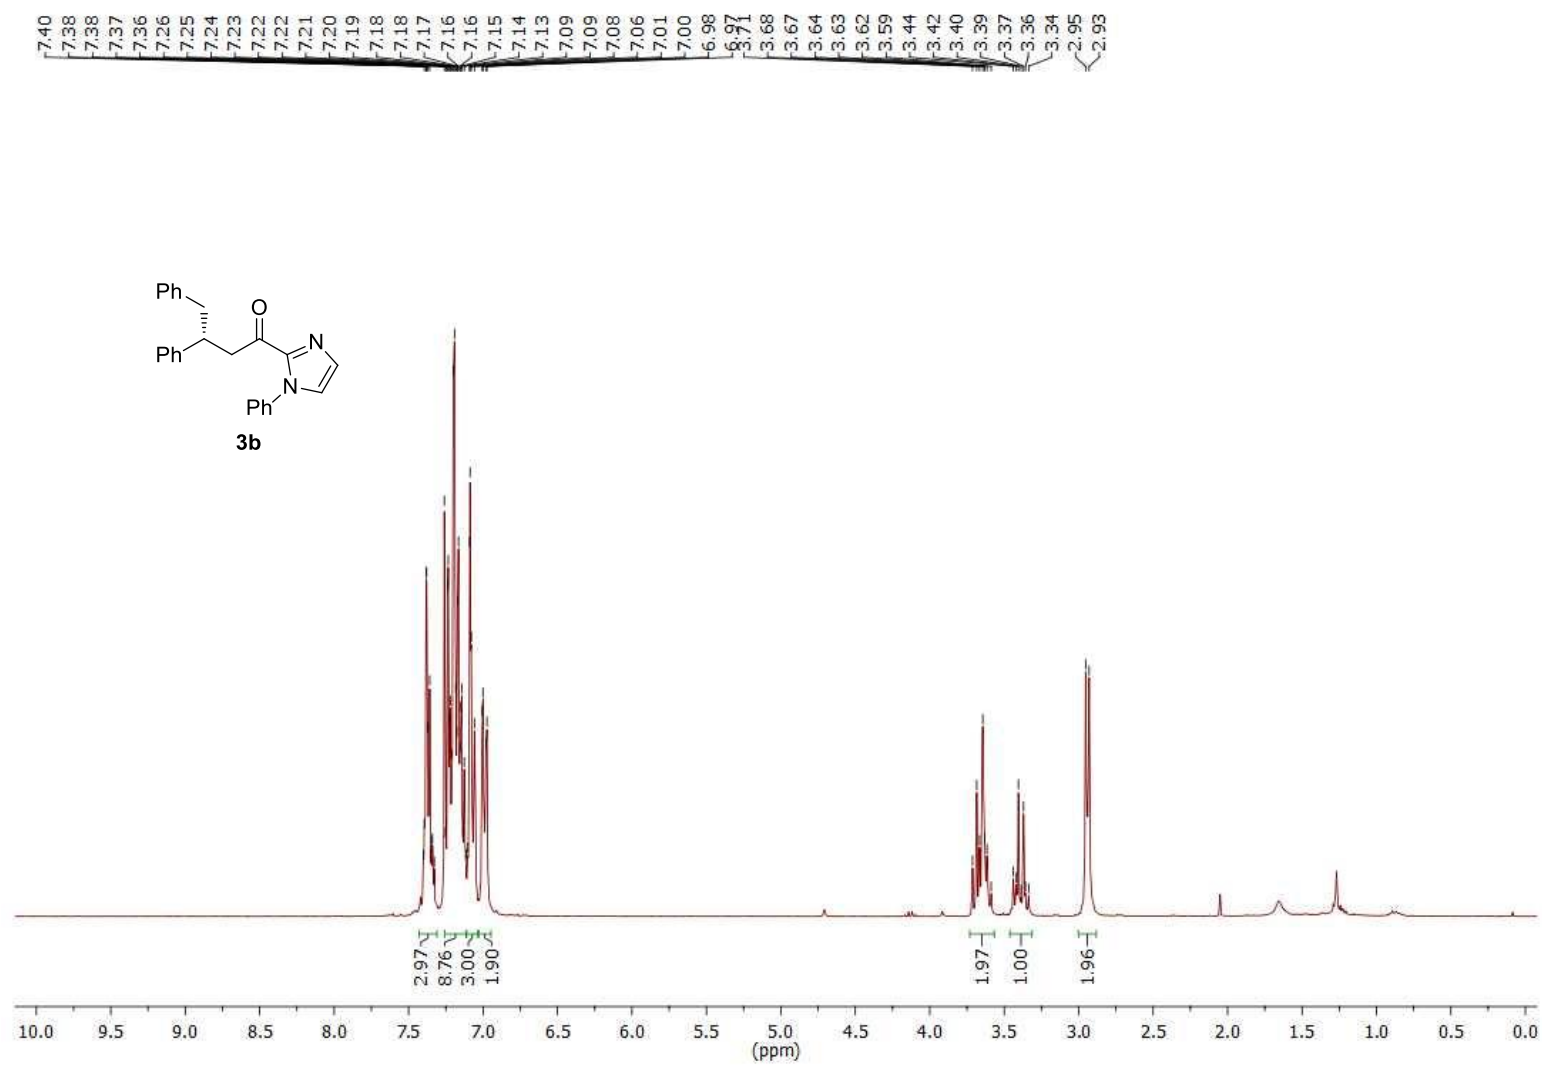

Figure S35. <sup>1</sup>H spectrum of **3b**.

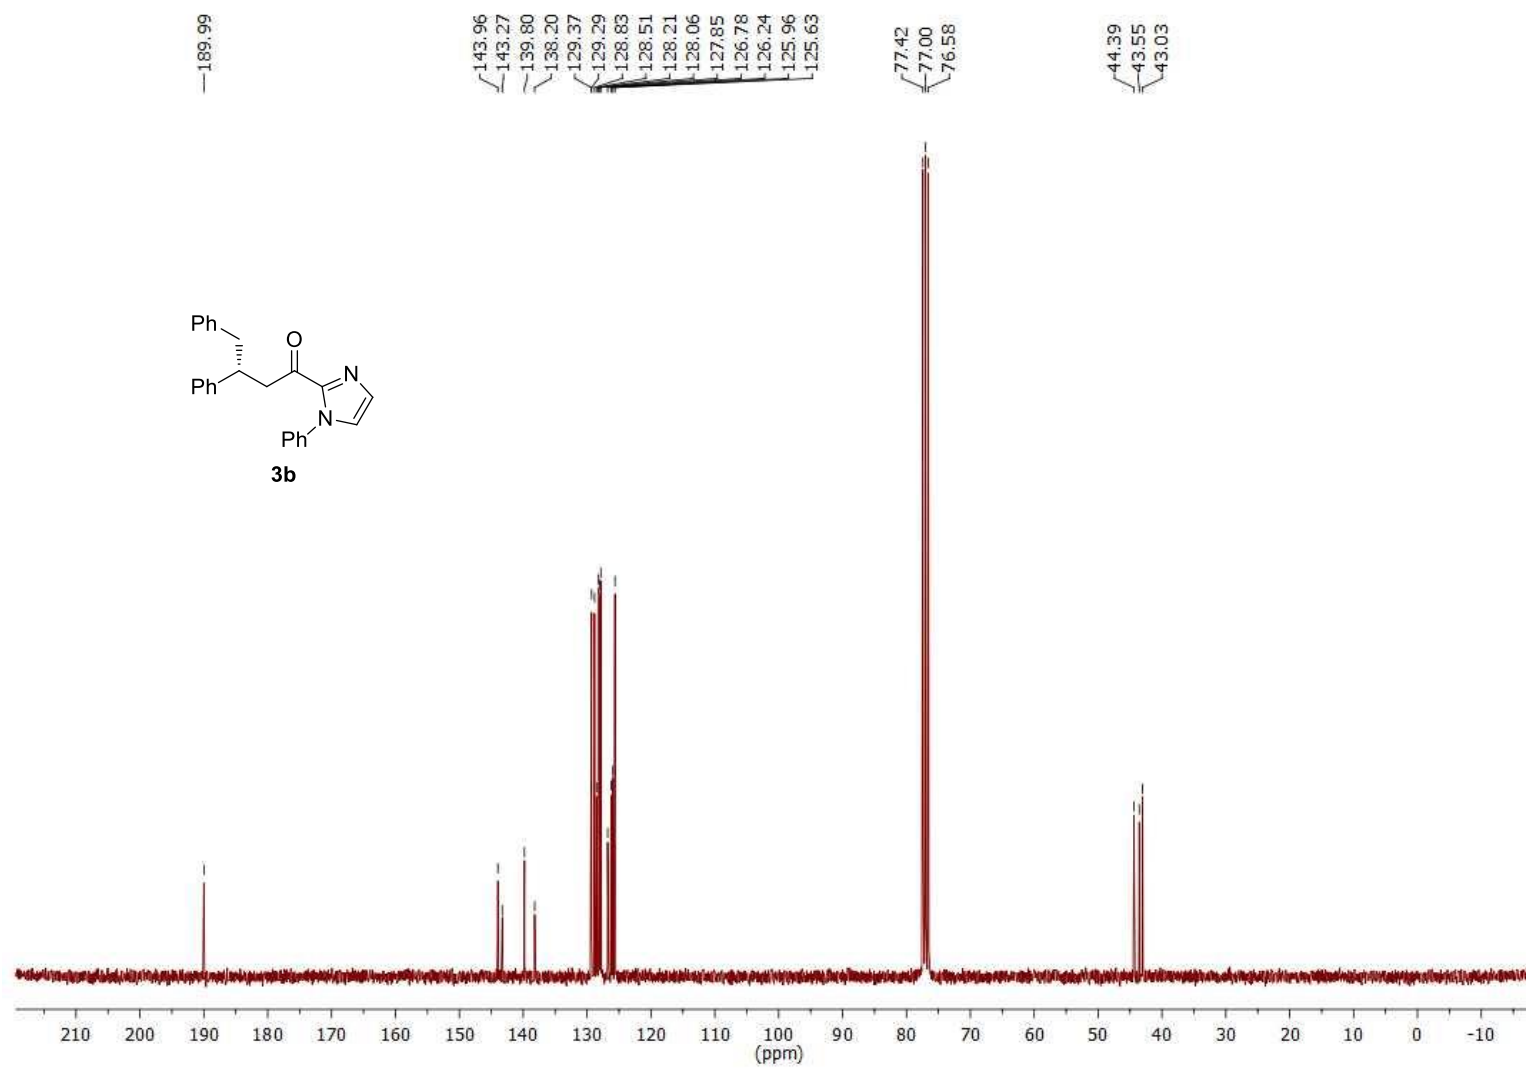

Figure S36. <sup>13</sup>C spectrum of **3b**.

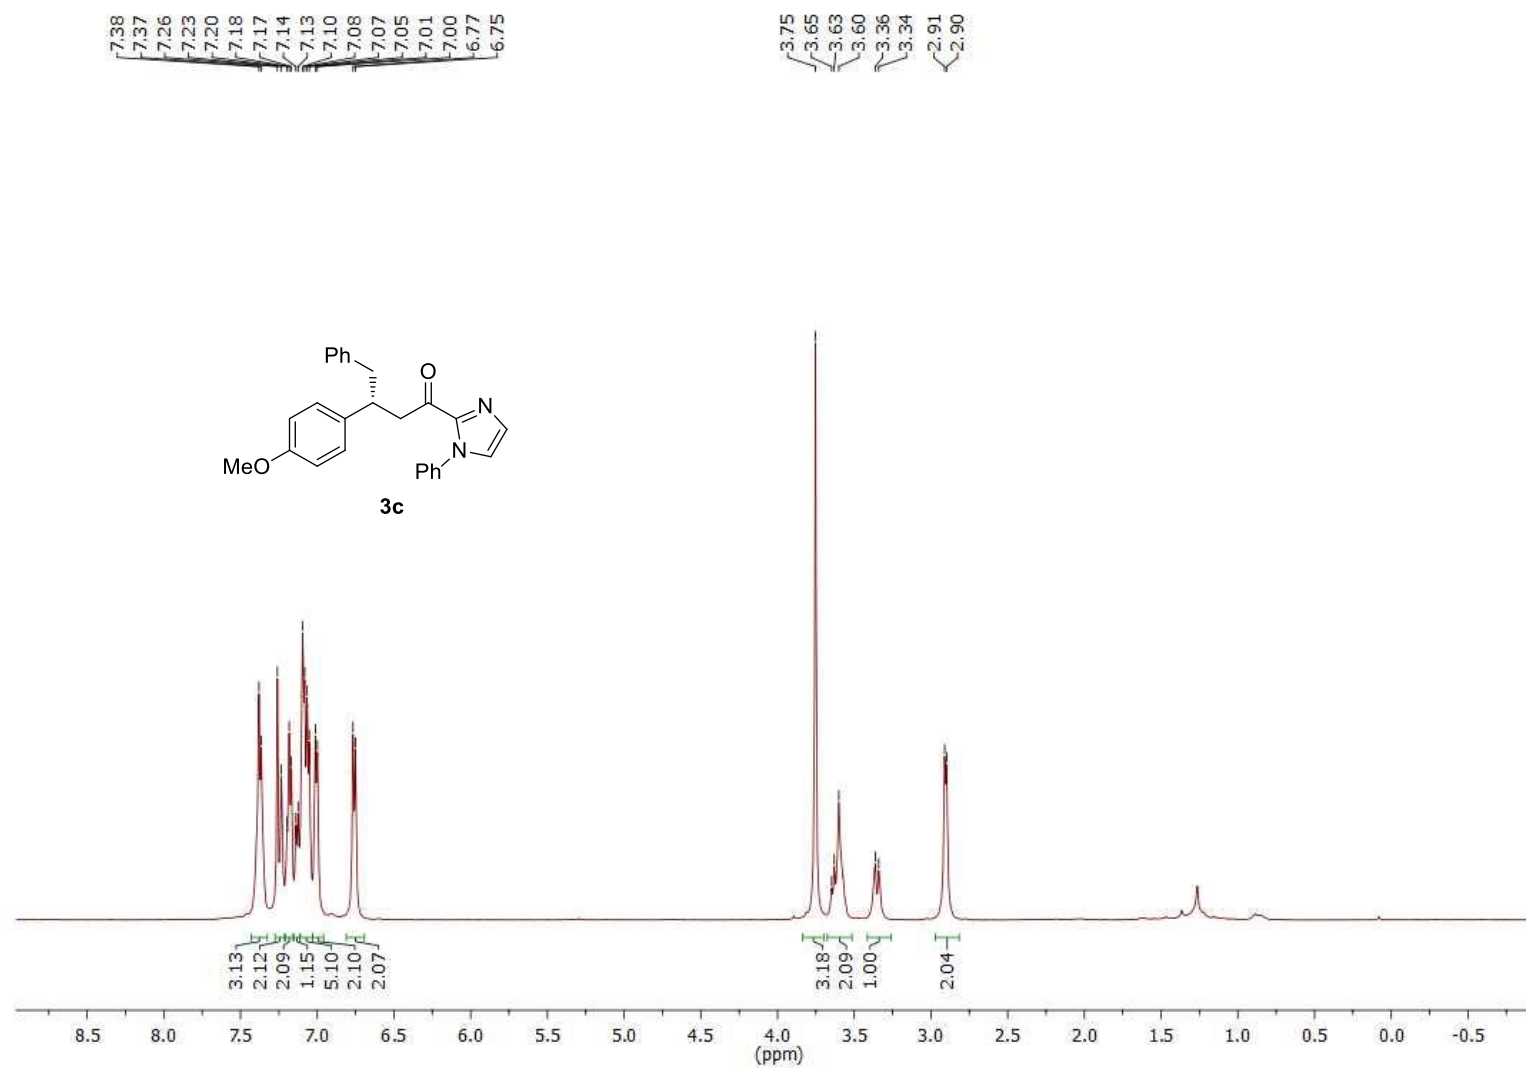

Figure S37. <sup>1</sup>H spectrum of **3c**.



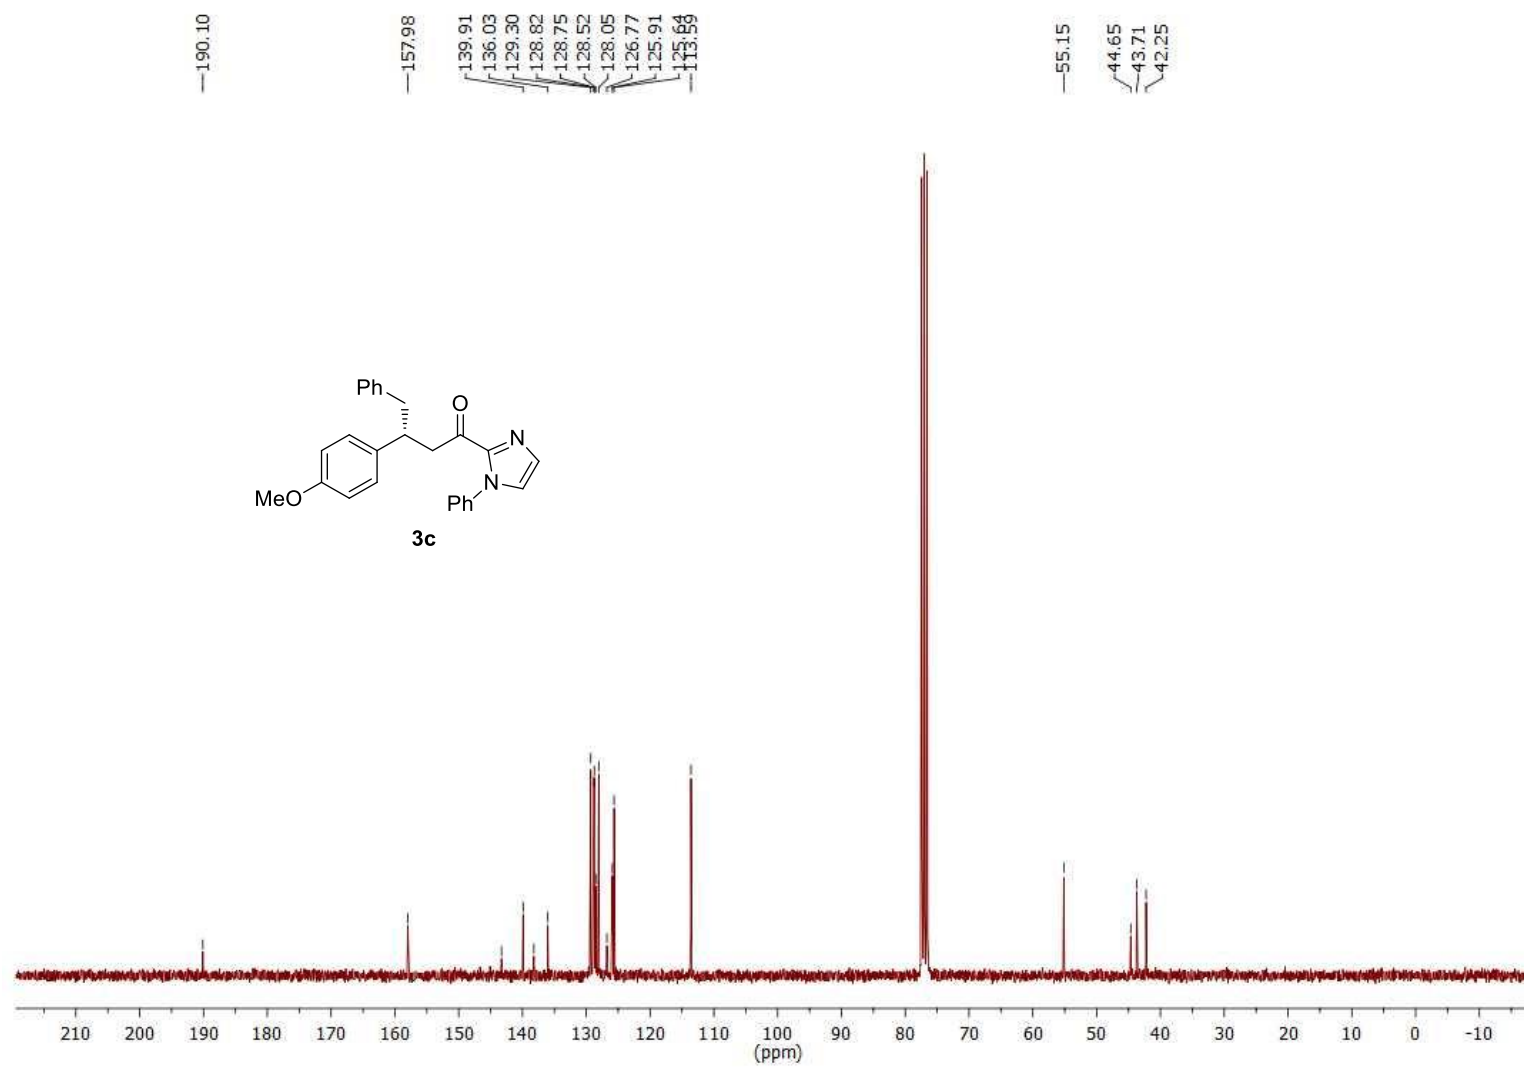

Figure S38. <sup>13</sup>C spectrum of **3c**.

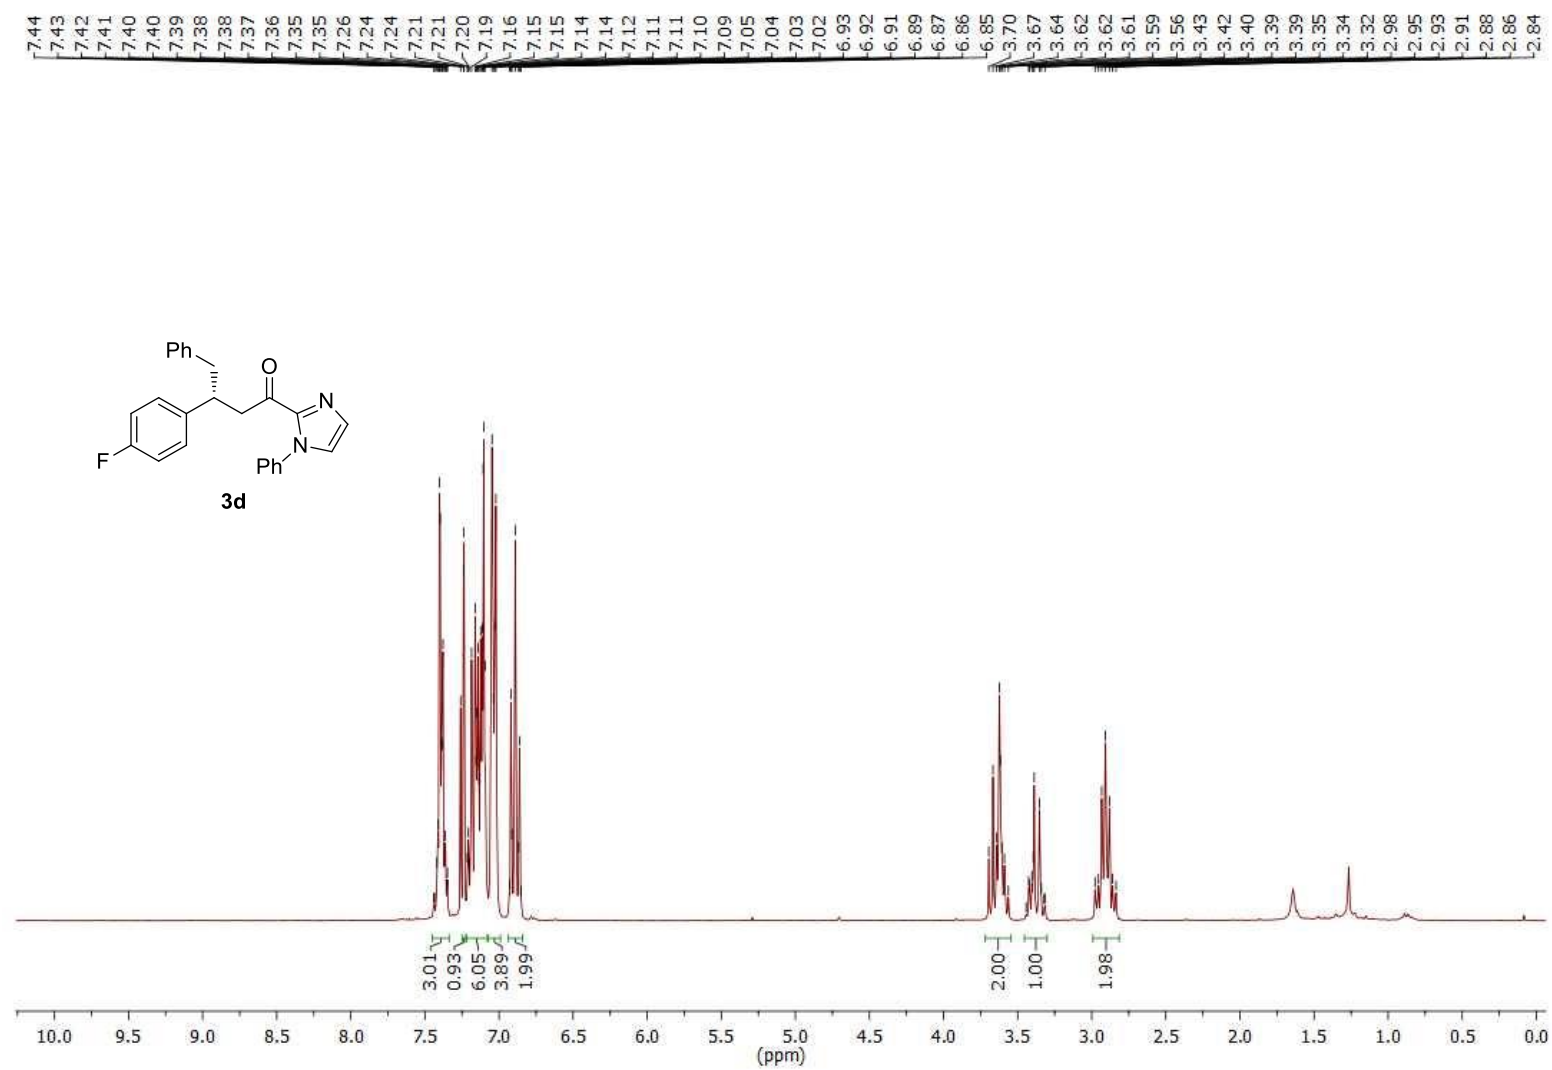

Figure S39. <sup>1</sup>H spectrum of **3d**.

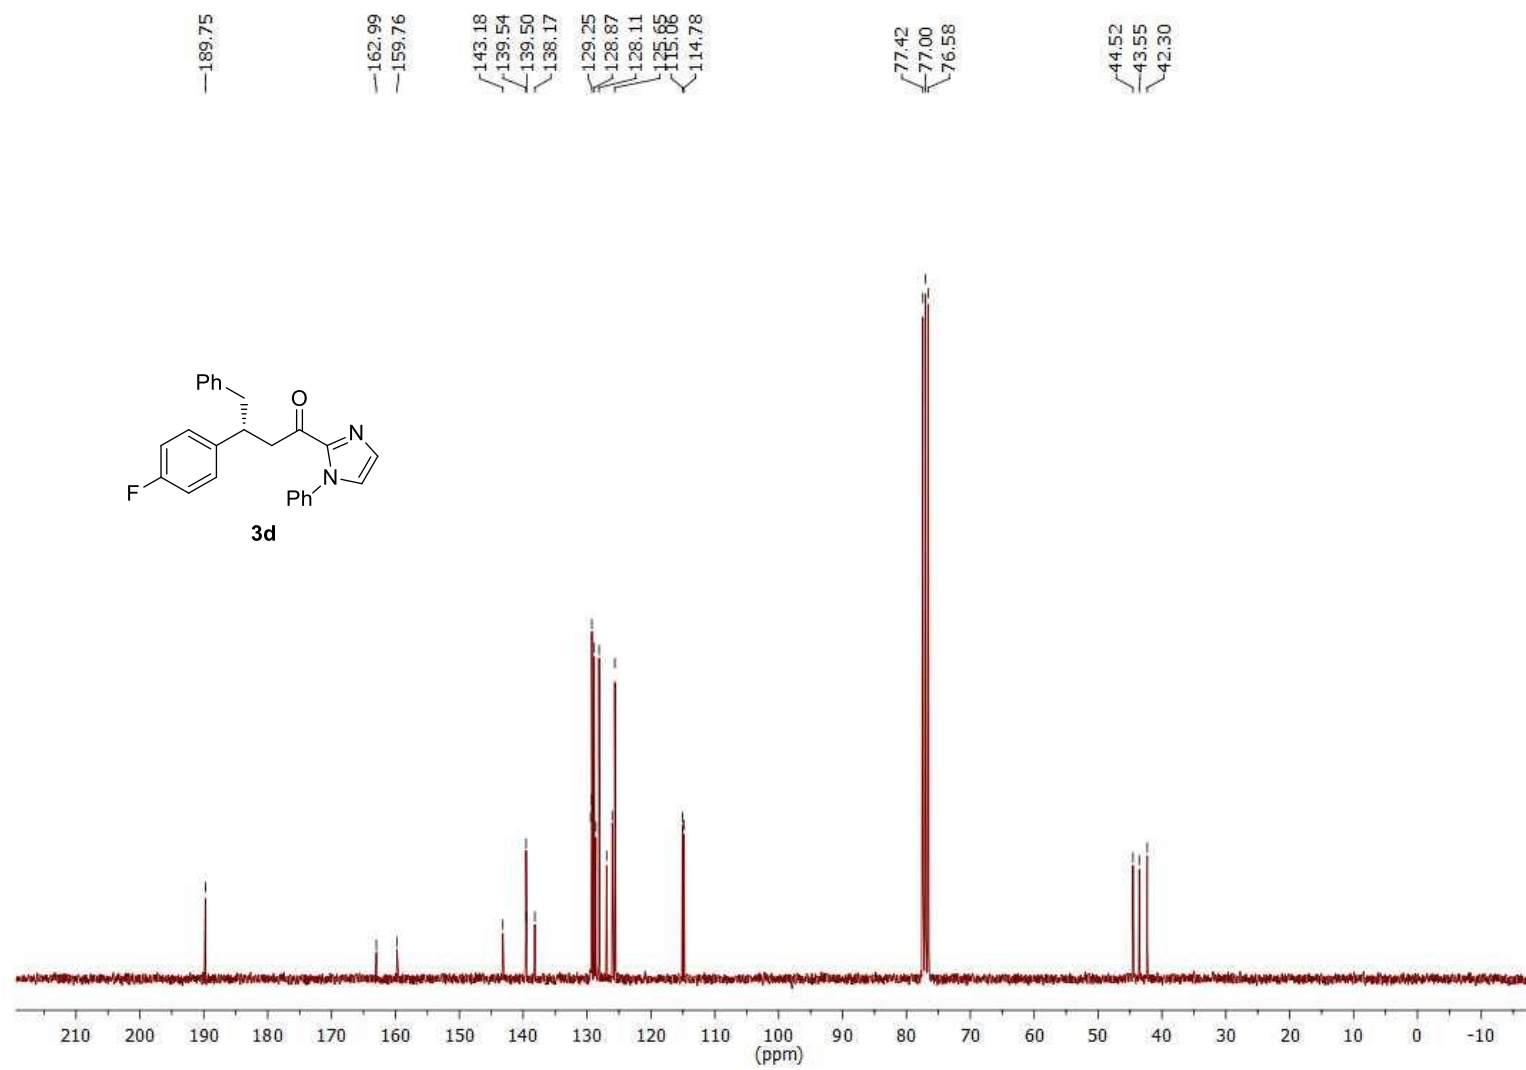

Figure S40.  $^{13}\text{C}$  spectrum of **3d**.

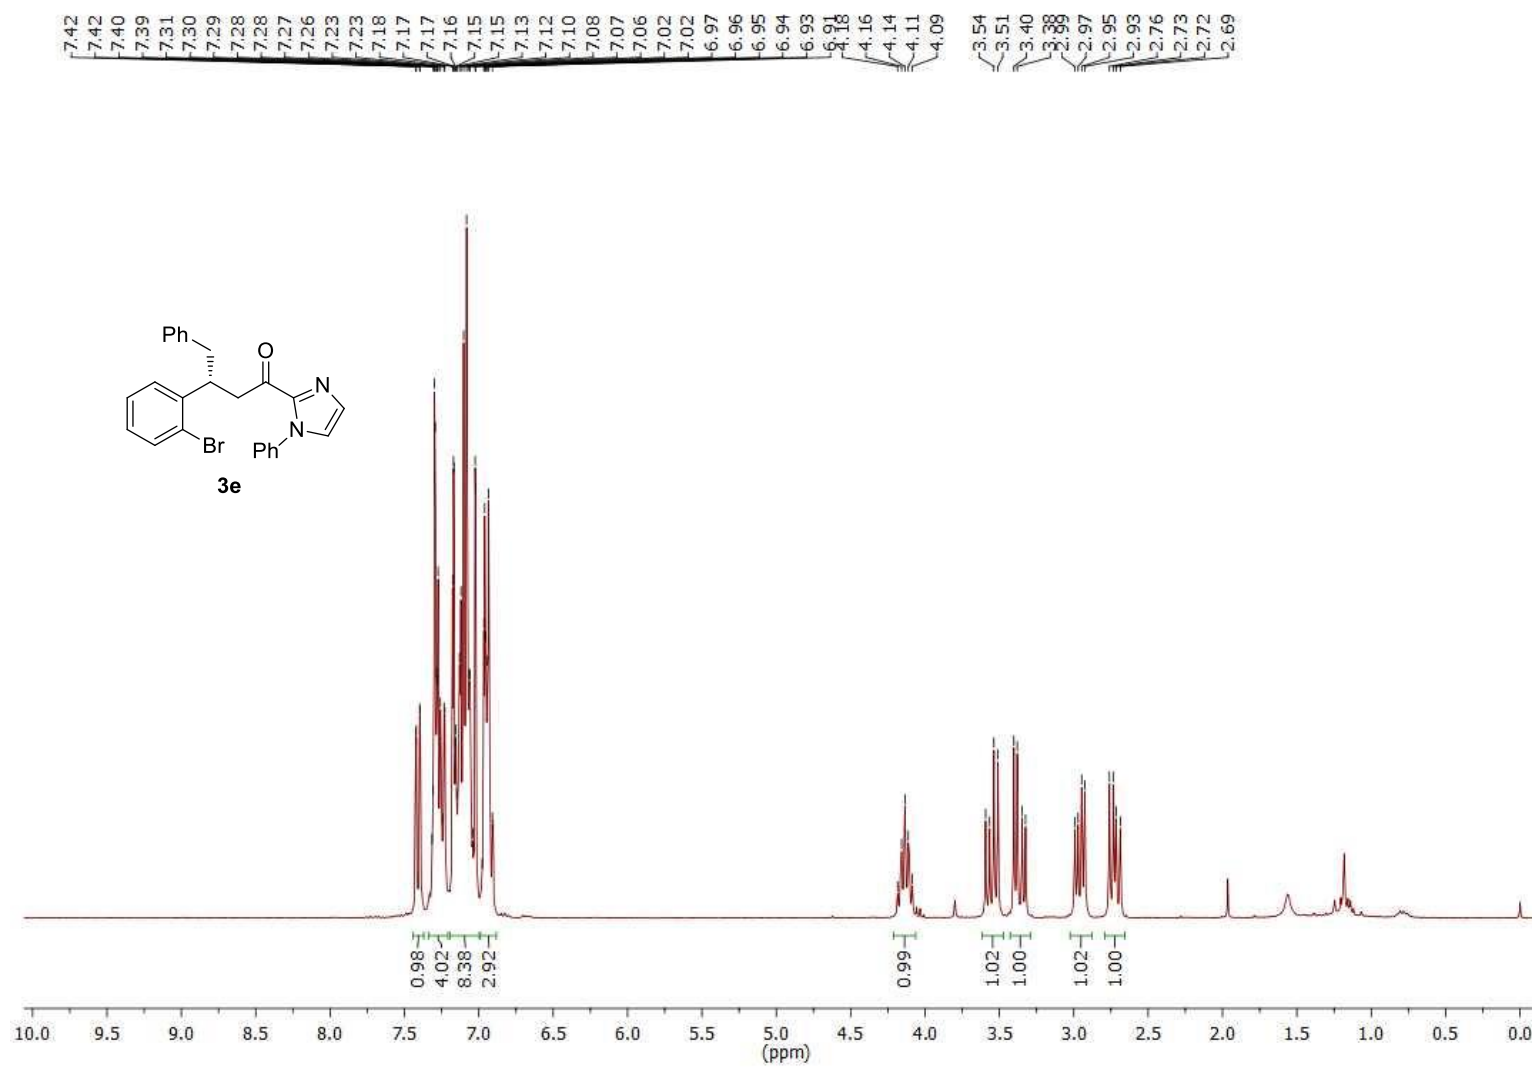

Figure S41. <sup>1</sup>H spectrum of **3e**.

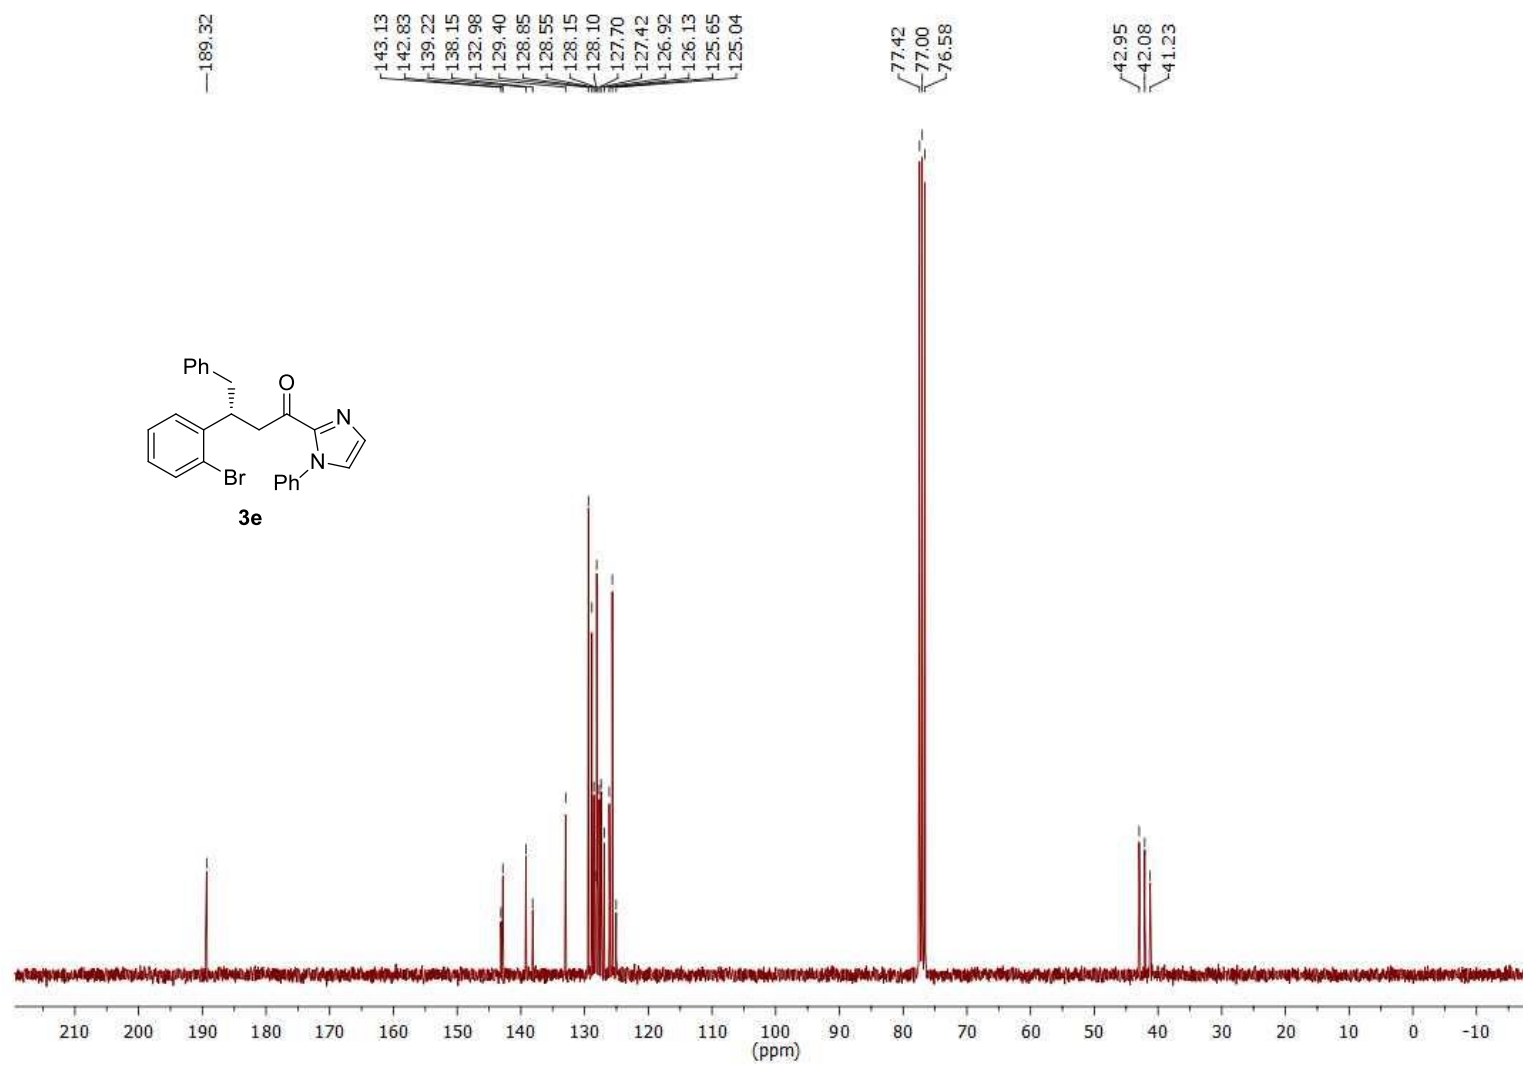

Figure S42. <sup>13</sup>C spectrum of **3e**.

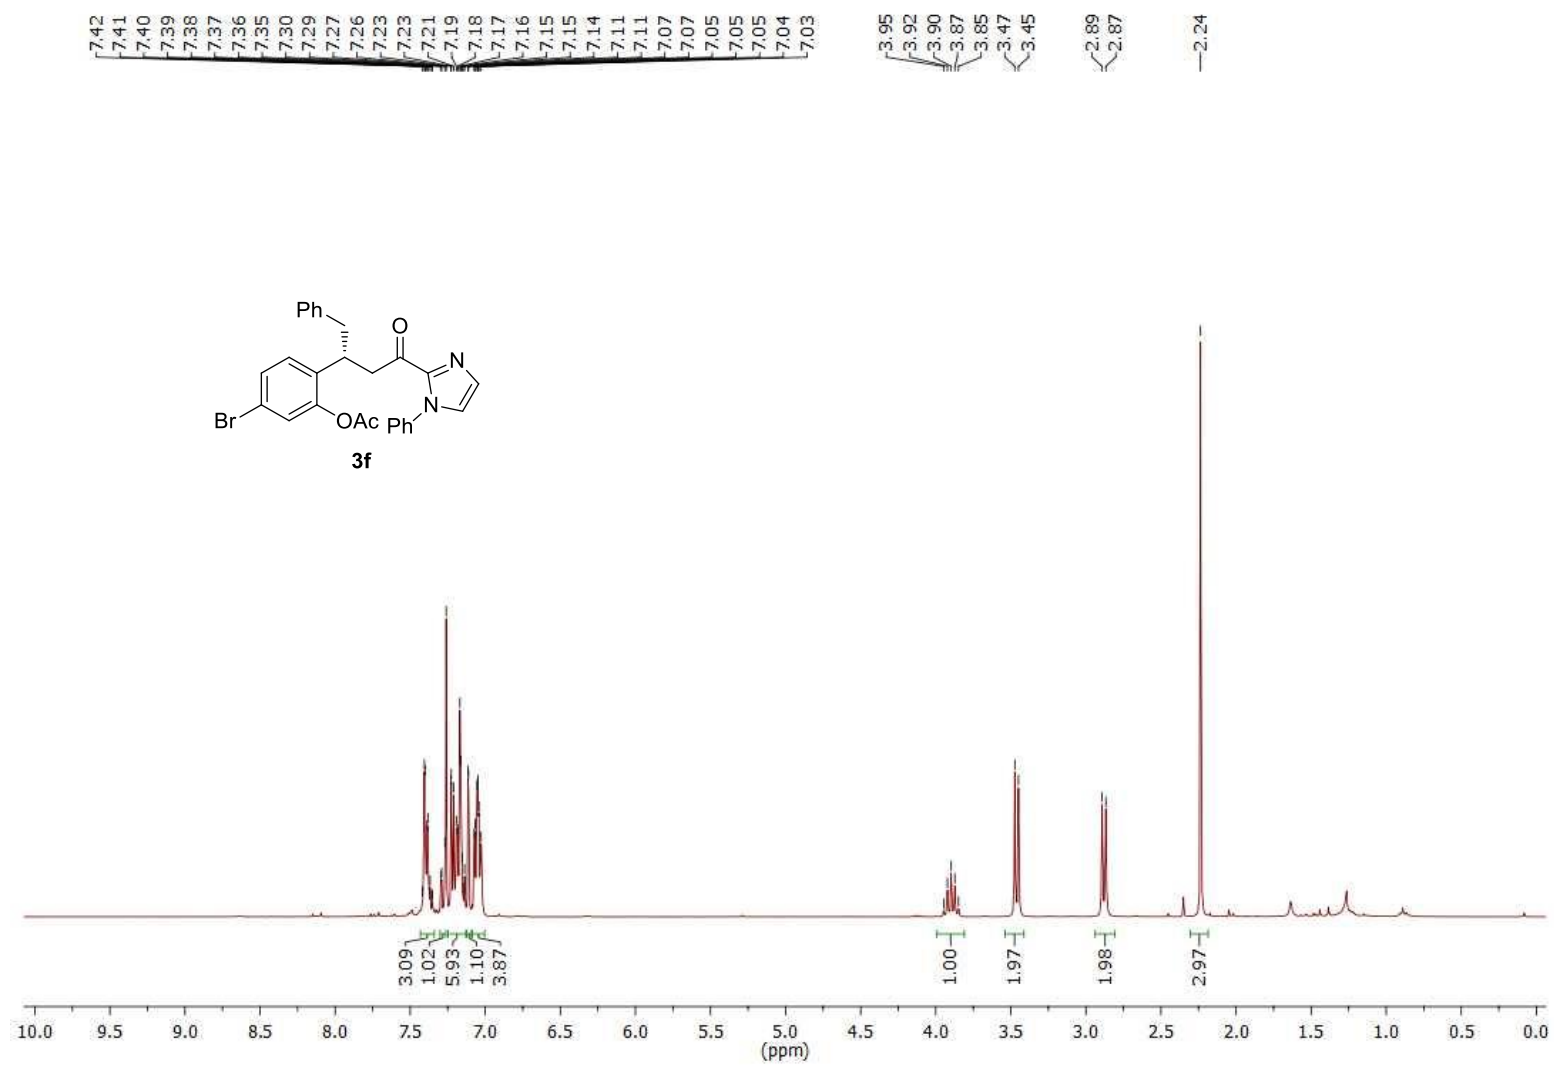

Figure S43. <sup>1</sup>H spectrum of **3f**.

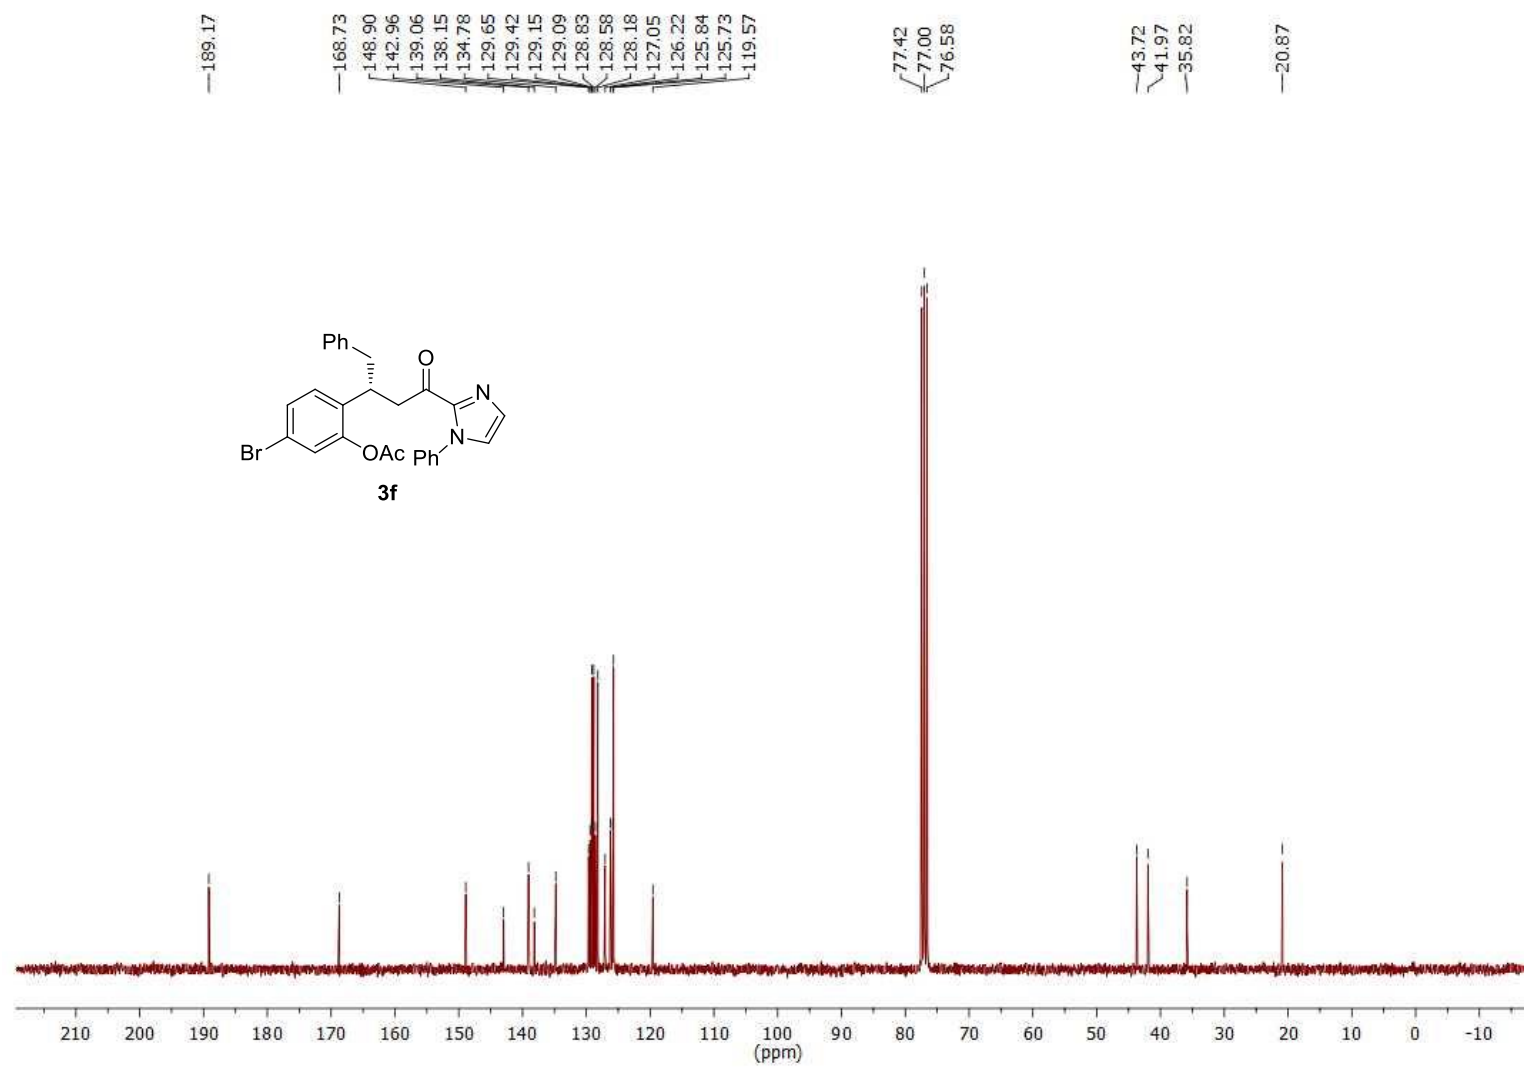

Figure S44. <sup>13</sup>C spectrum of **3f**.

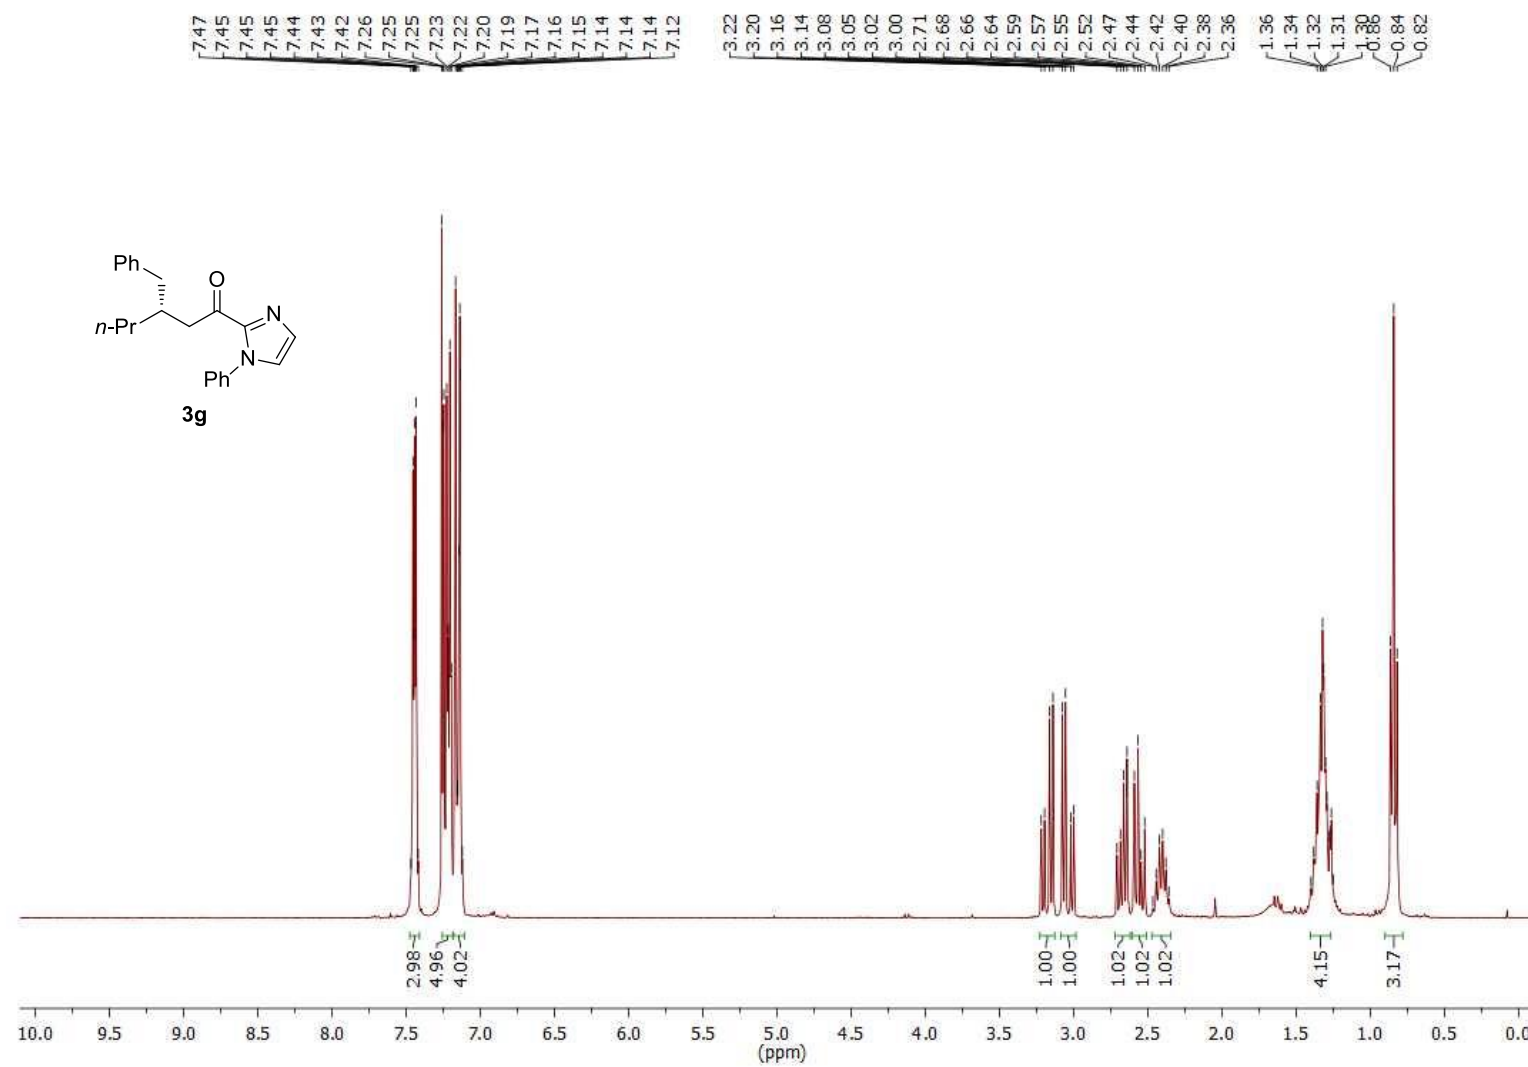

Figure S45. <sup>1</sup>H spectrum of **3g**.



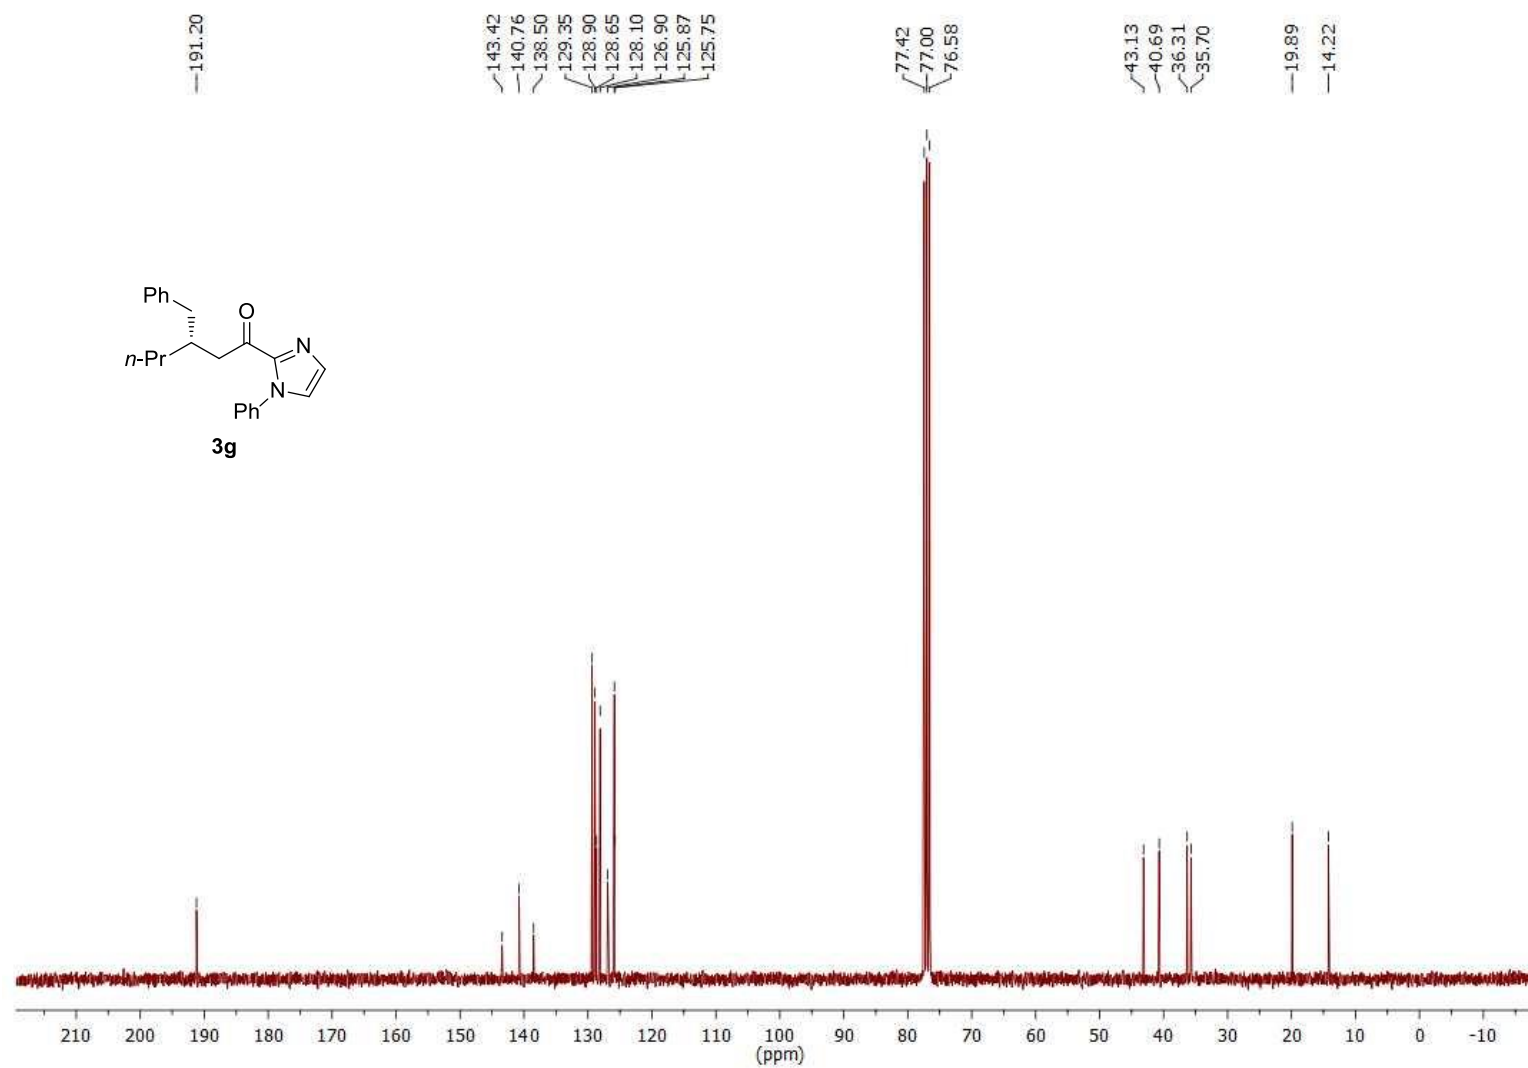

Figure S46.  $^{13}\text{C}$  spectrum of **3g**.

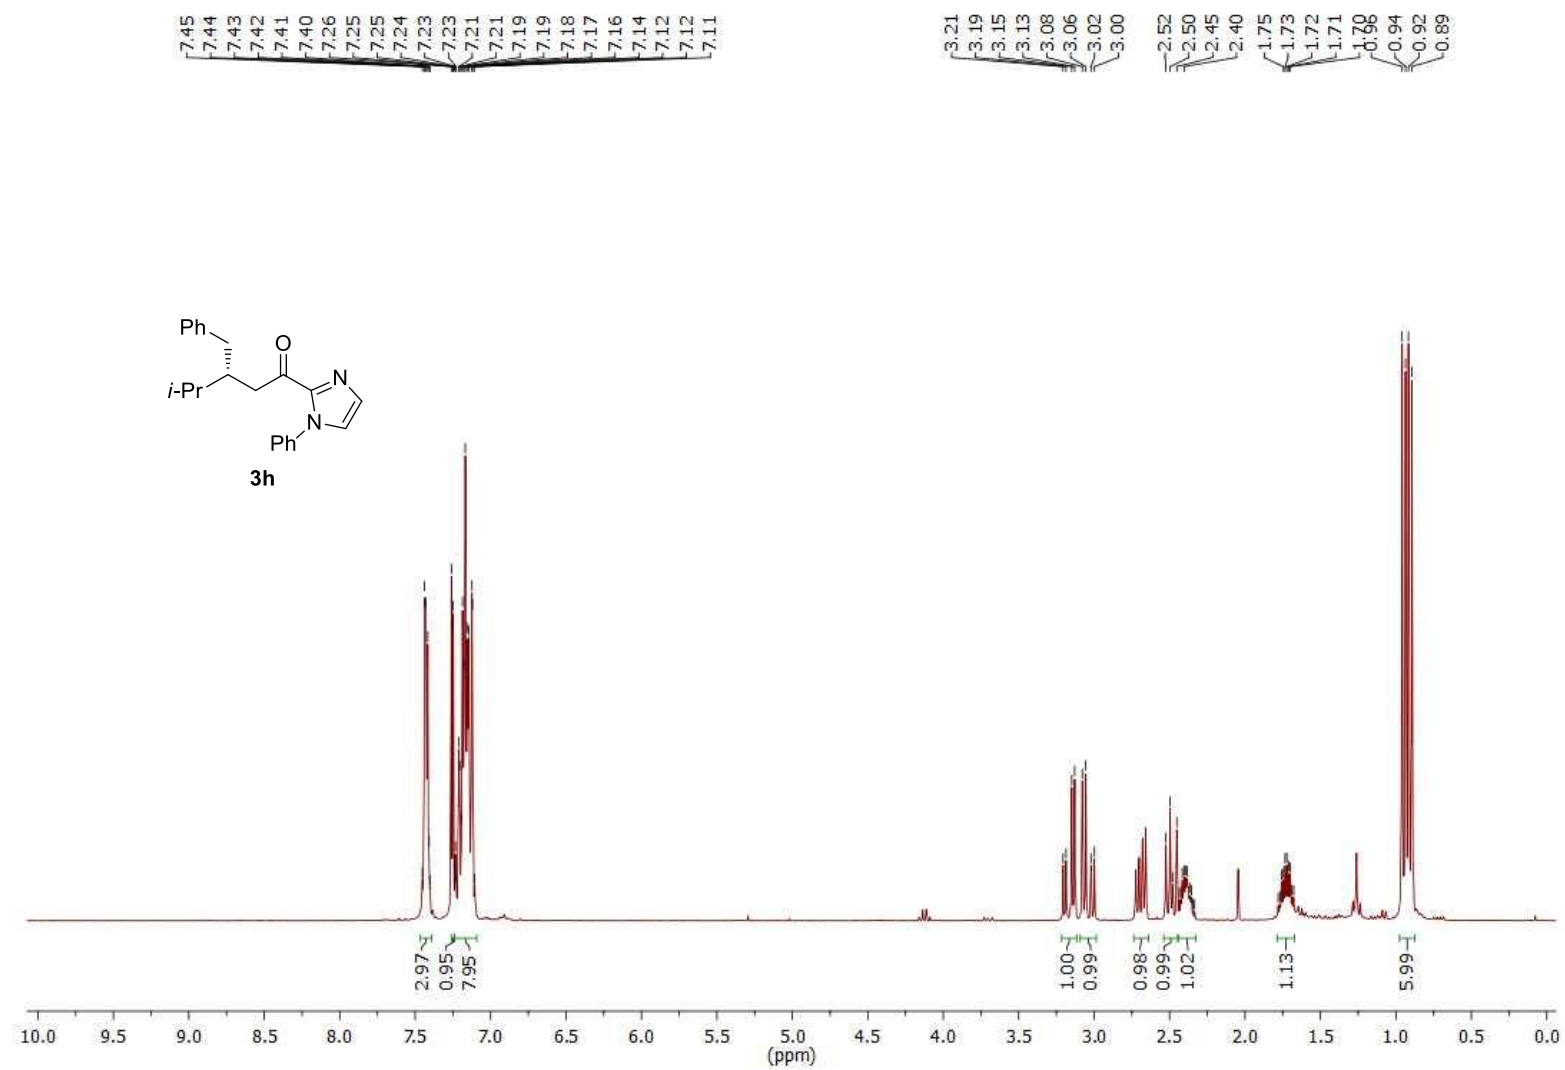

Figure S47. <sup>1</sup>H spectrum of **3h**.

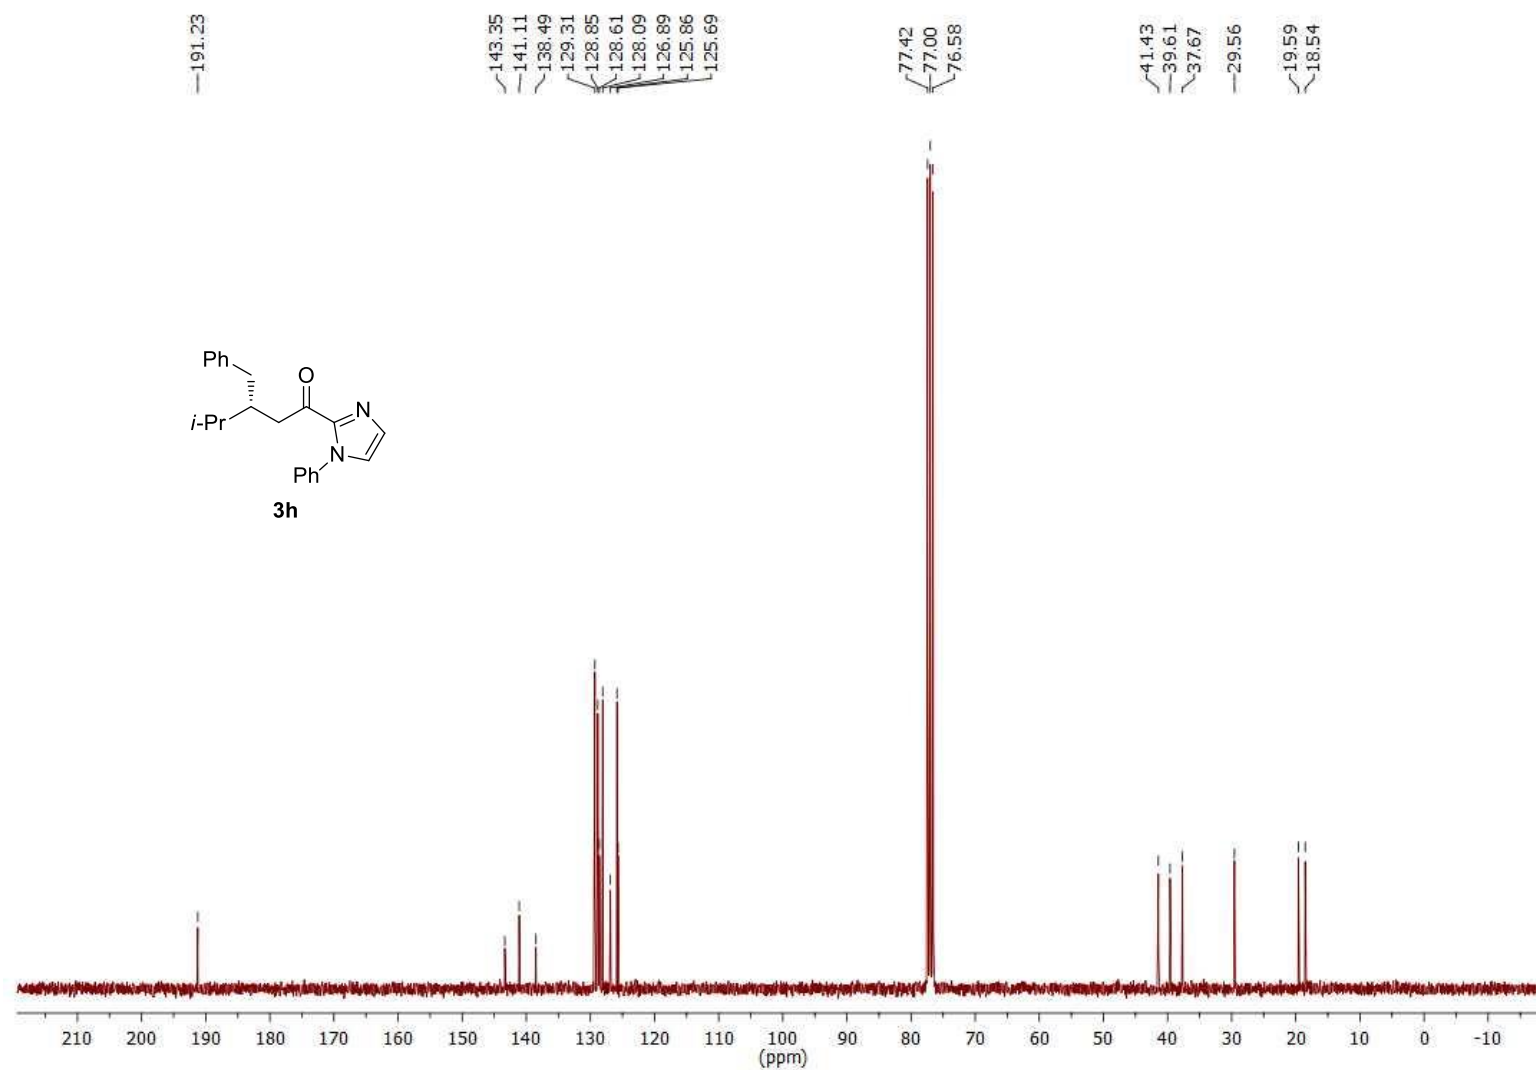

**Figure S48.** <sup>13</sup>C spectrum of **3h**.

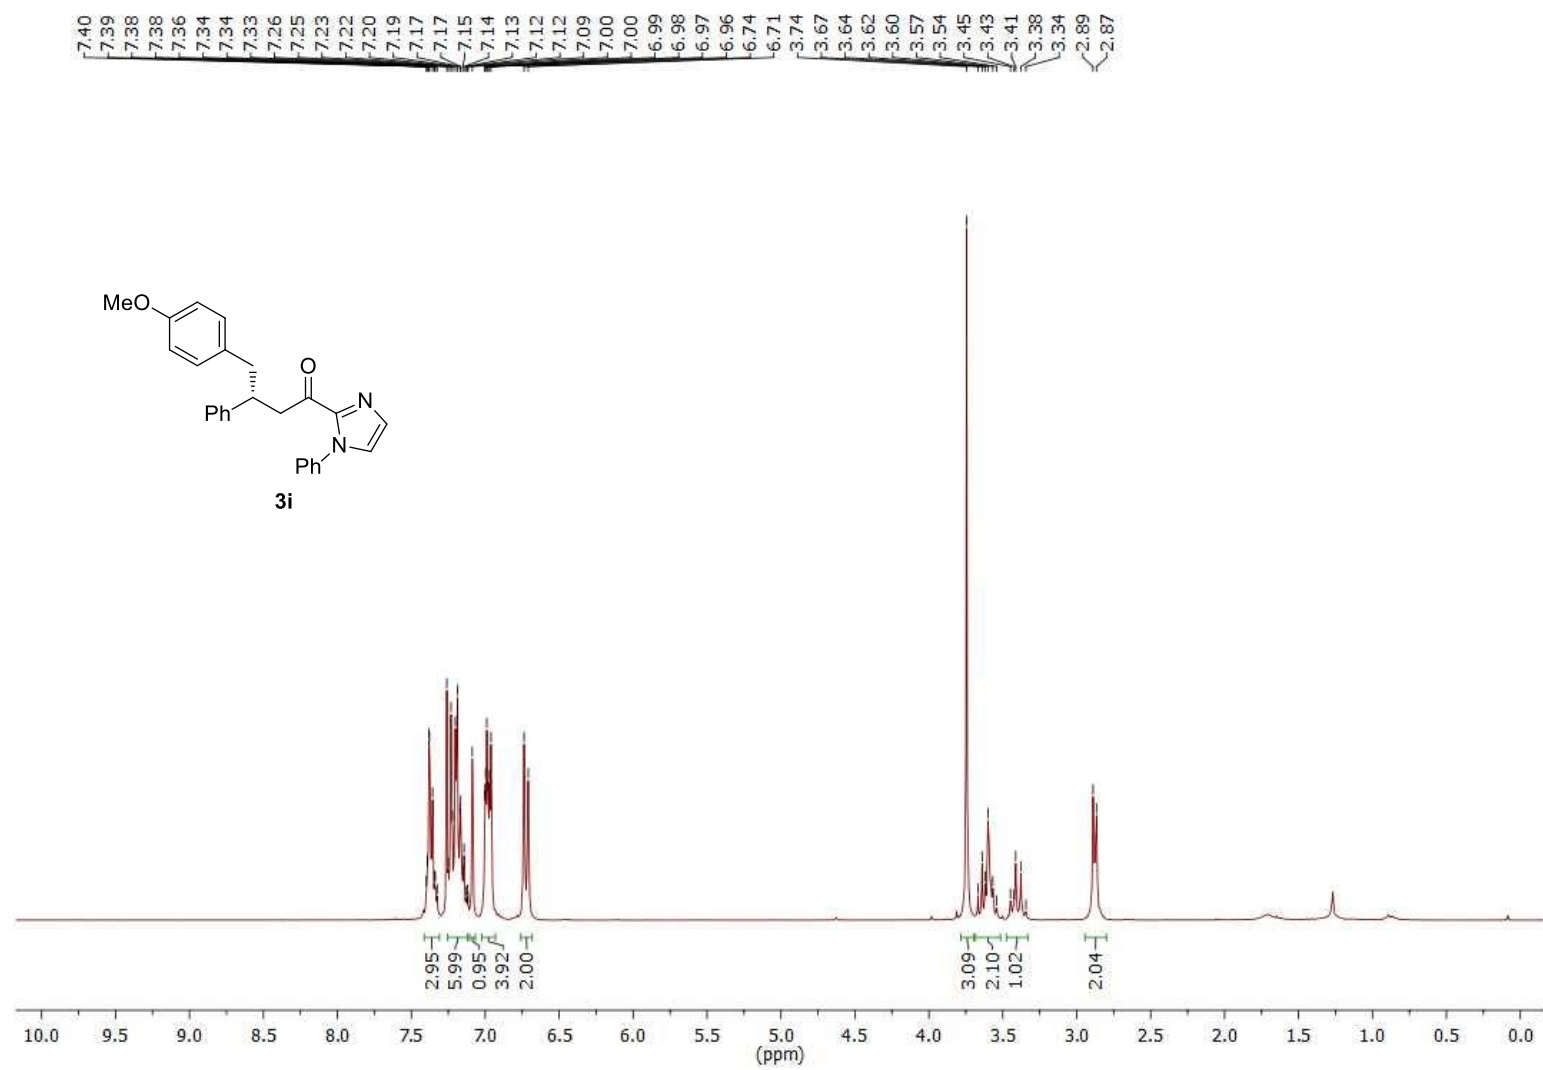

Figure S49. <sup>1</sup>H spectrum of **3i**.

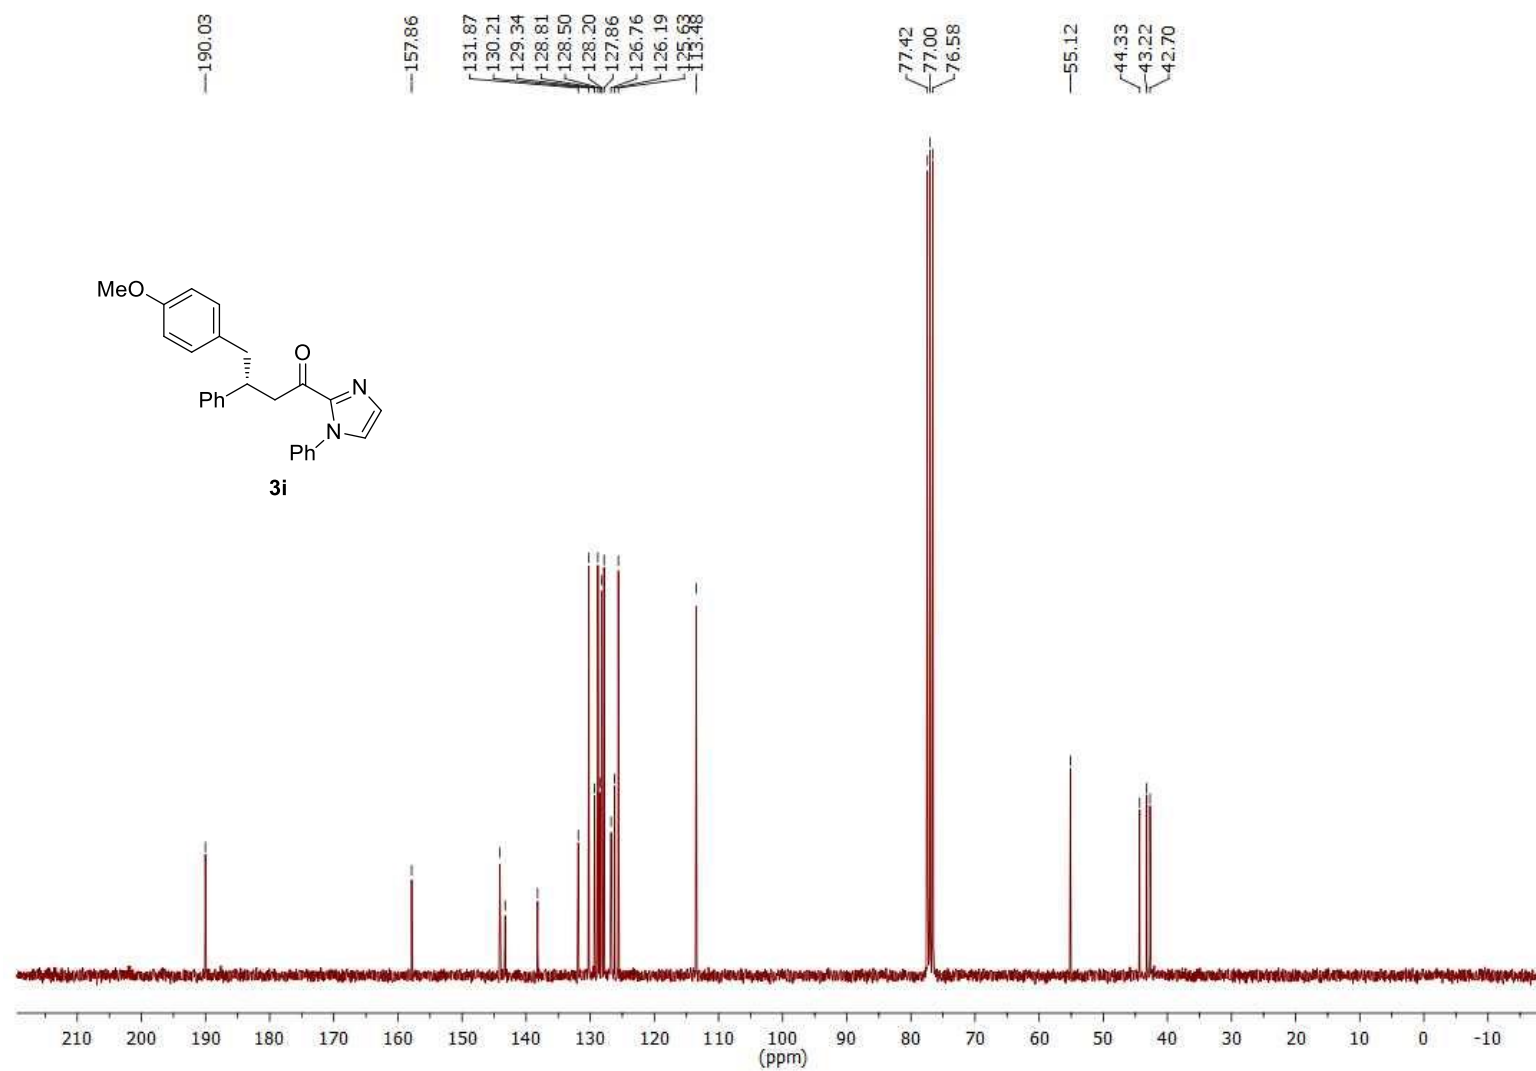

Figure S50.  $^{13}\text{C}$  spectrum of **3i**.

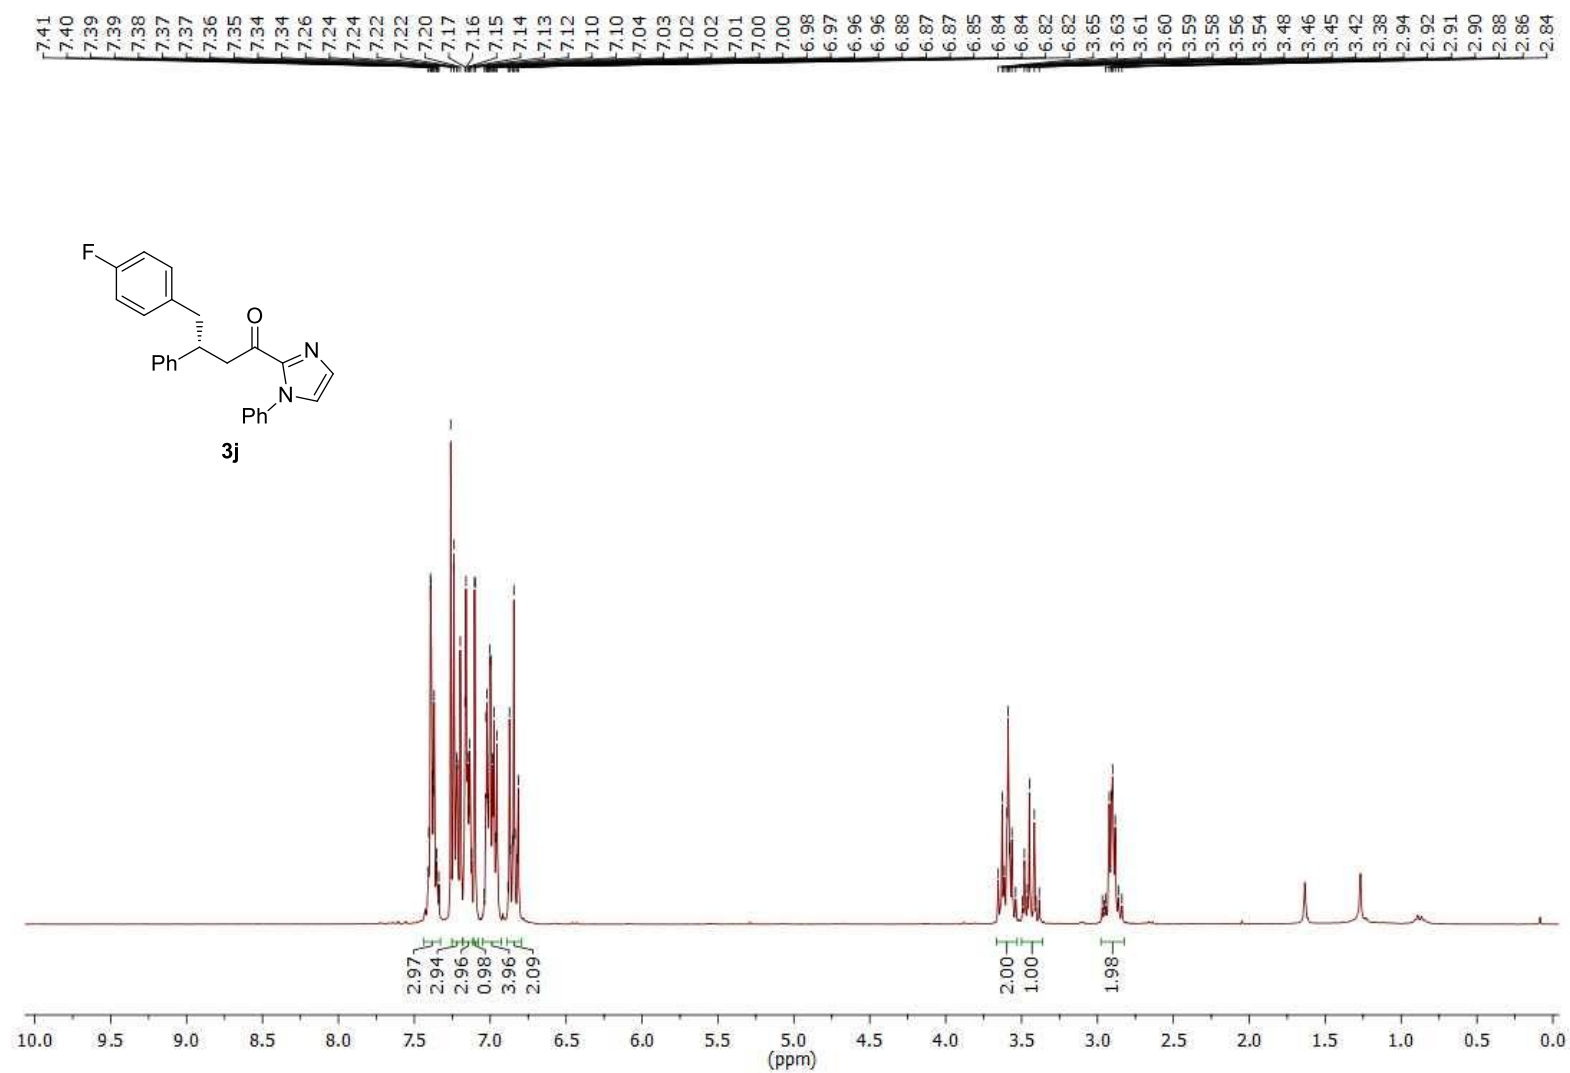

Figure S51. <sup>1</sup>H spectrum of **3j**.

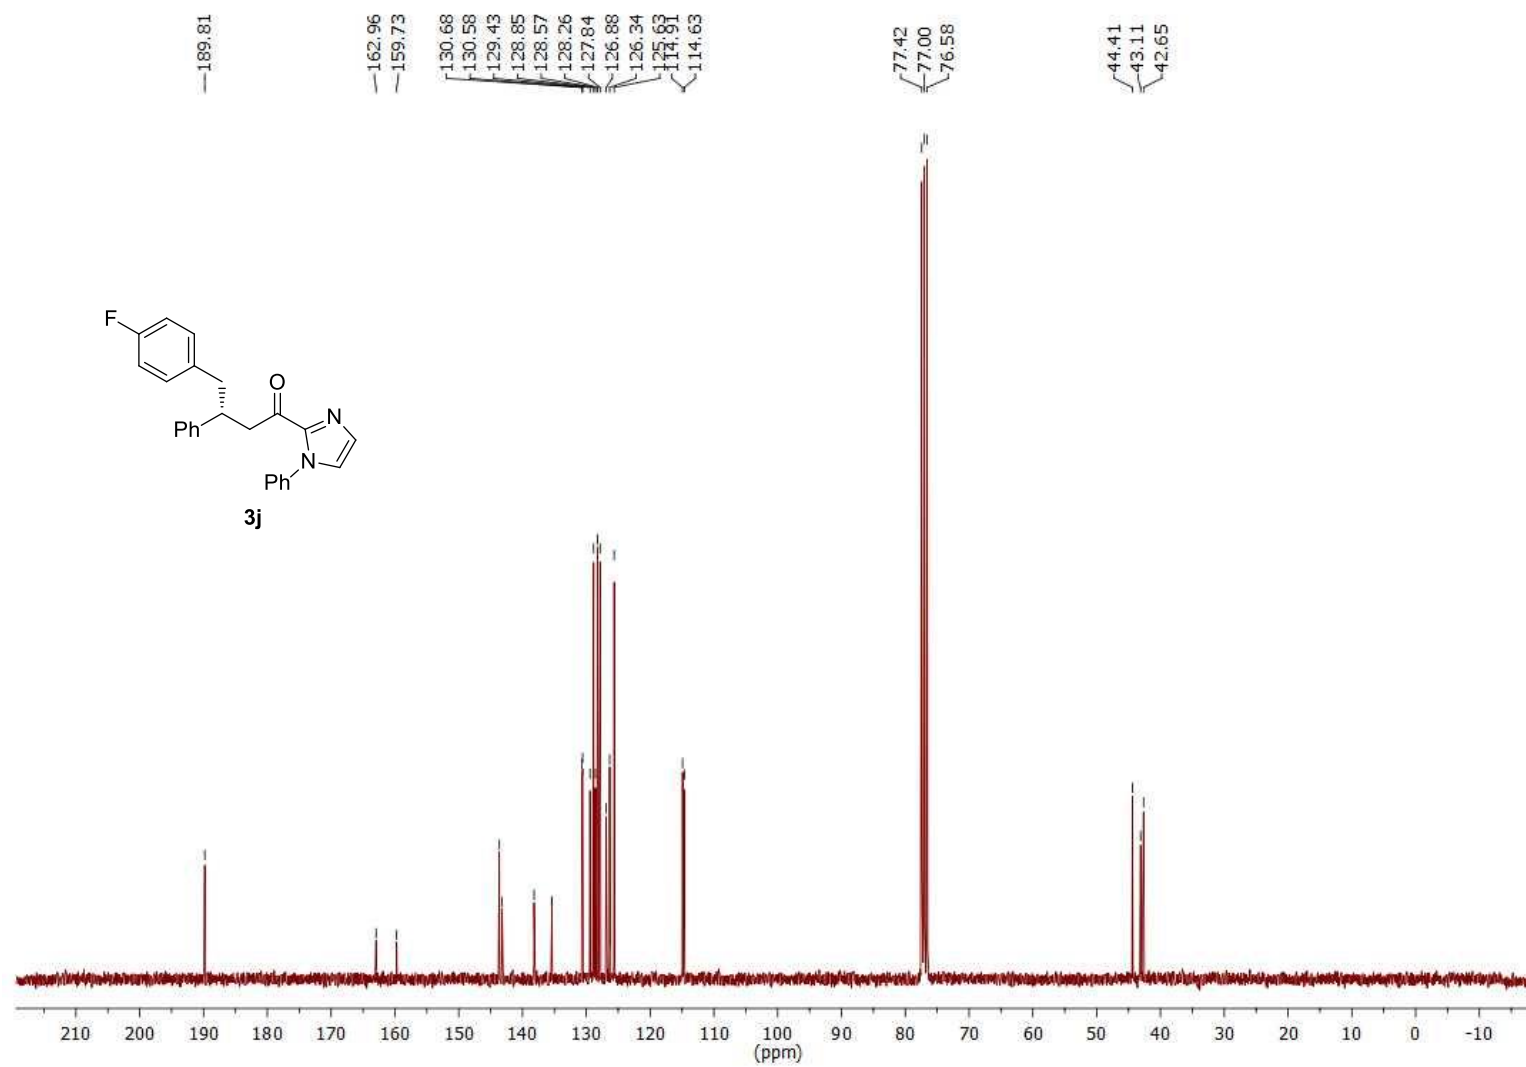

Figure S52.  $^{13}\text{C}$  spectrum of **3j**.

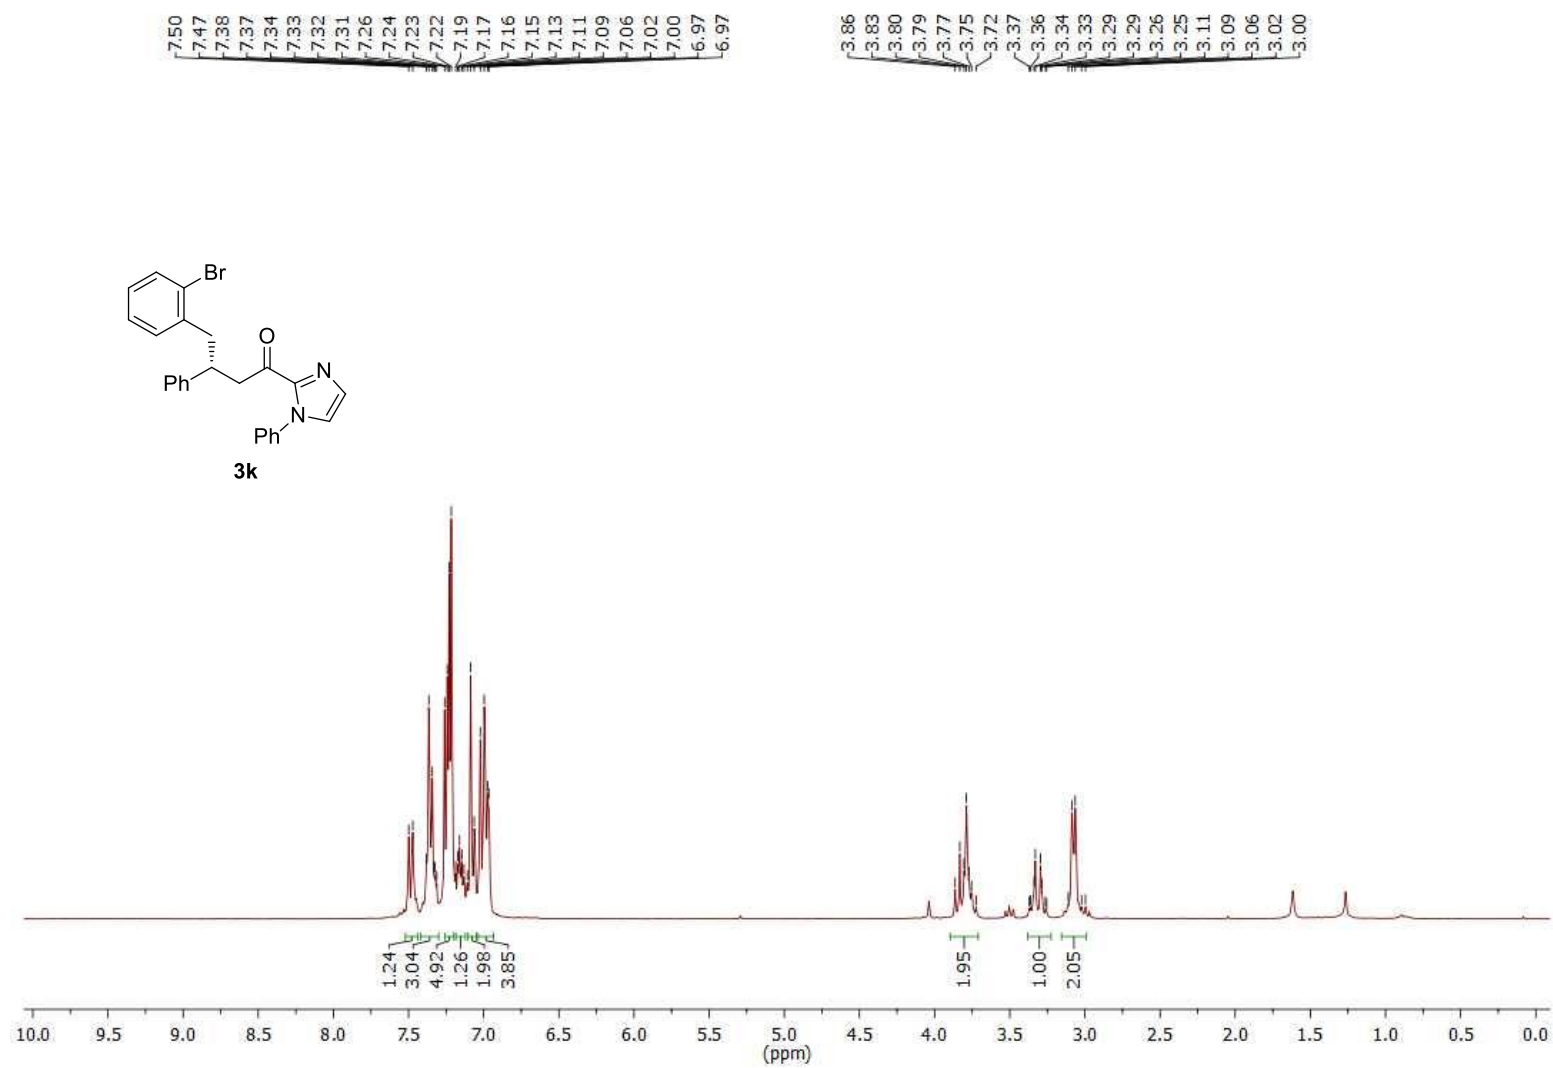

Figure S53. <sup>1</sup>H spectrum of **3k**.



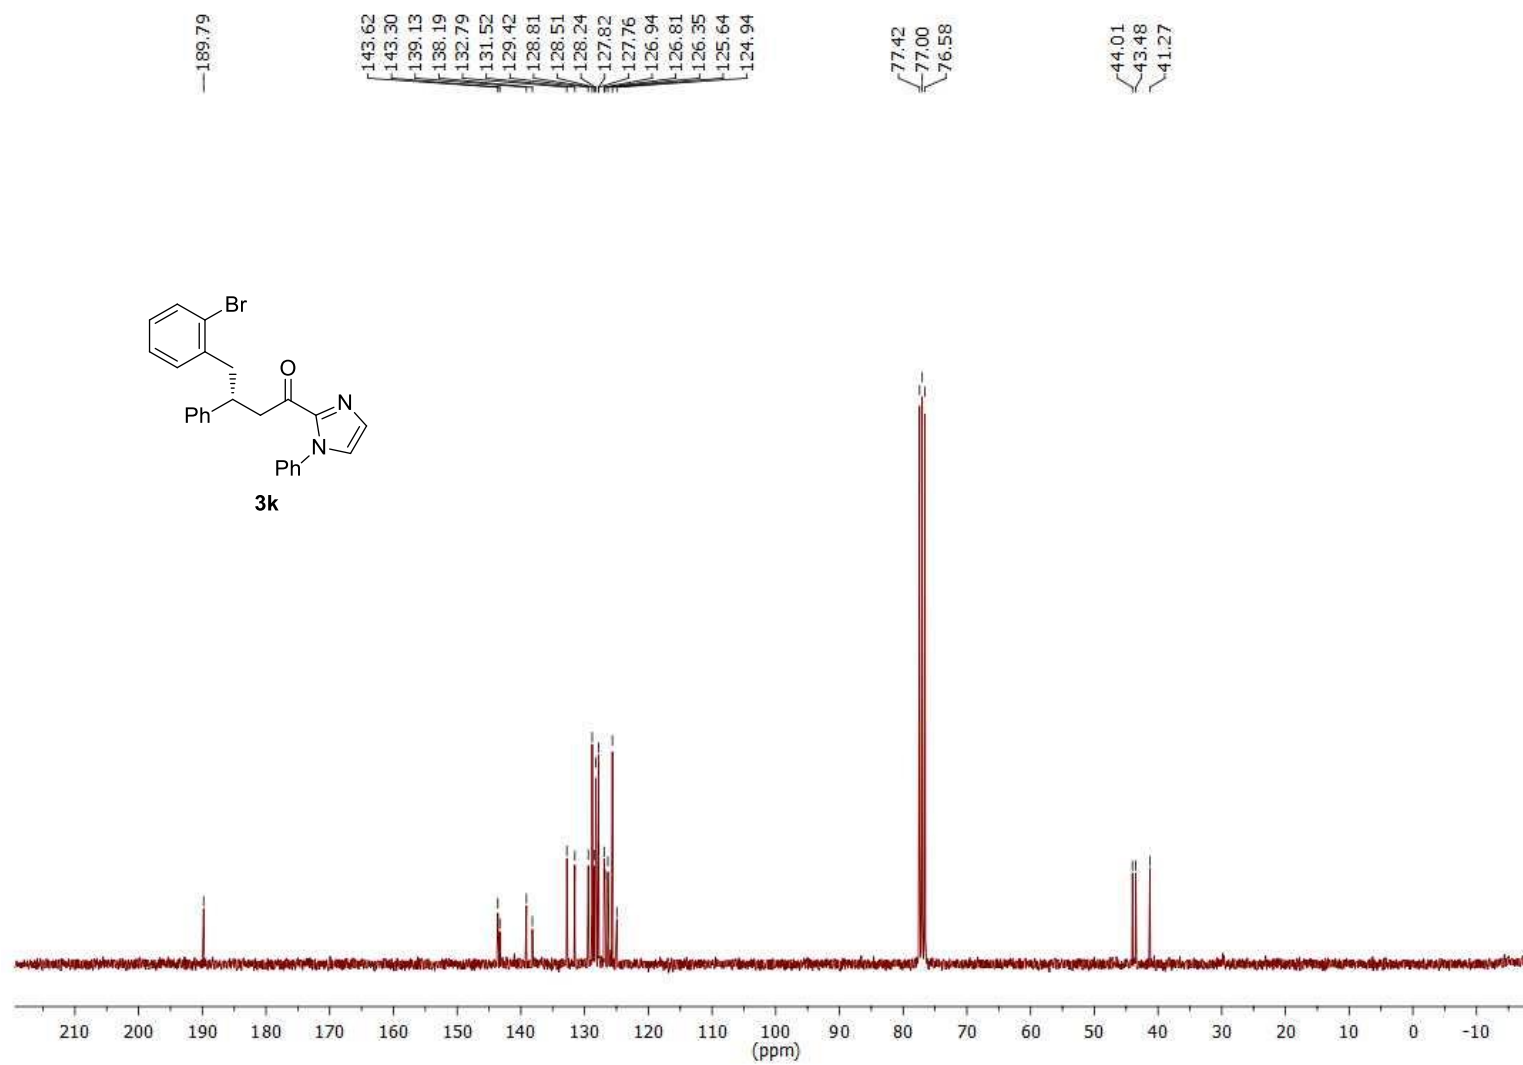

Figure S54.  $^{13}\text{C}$  spectrum of **3k**.

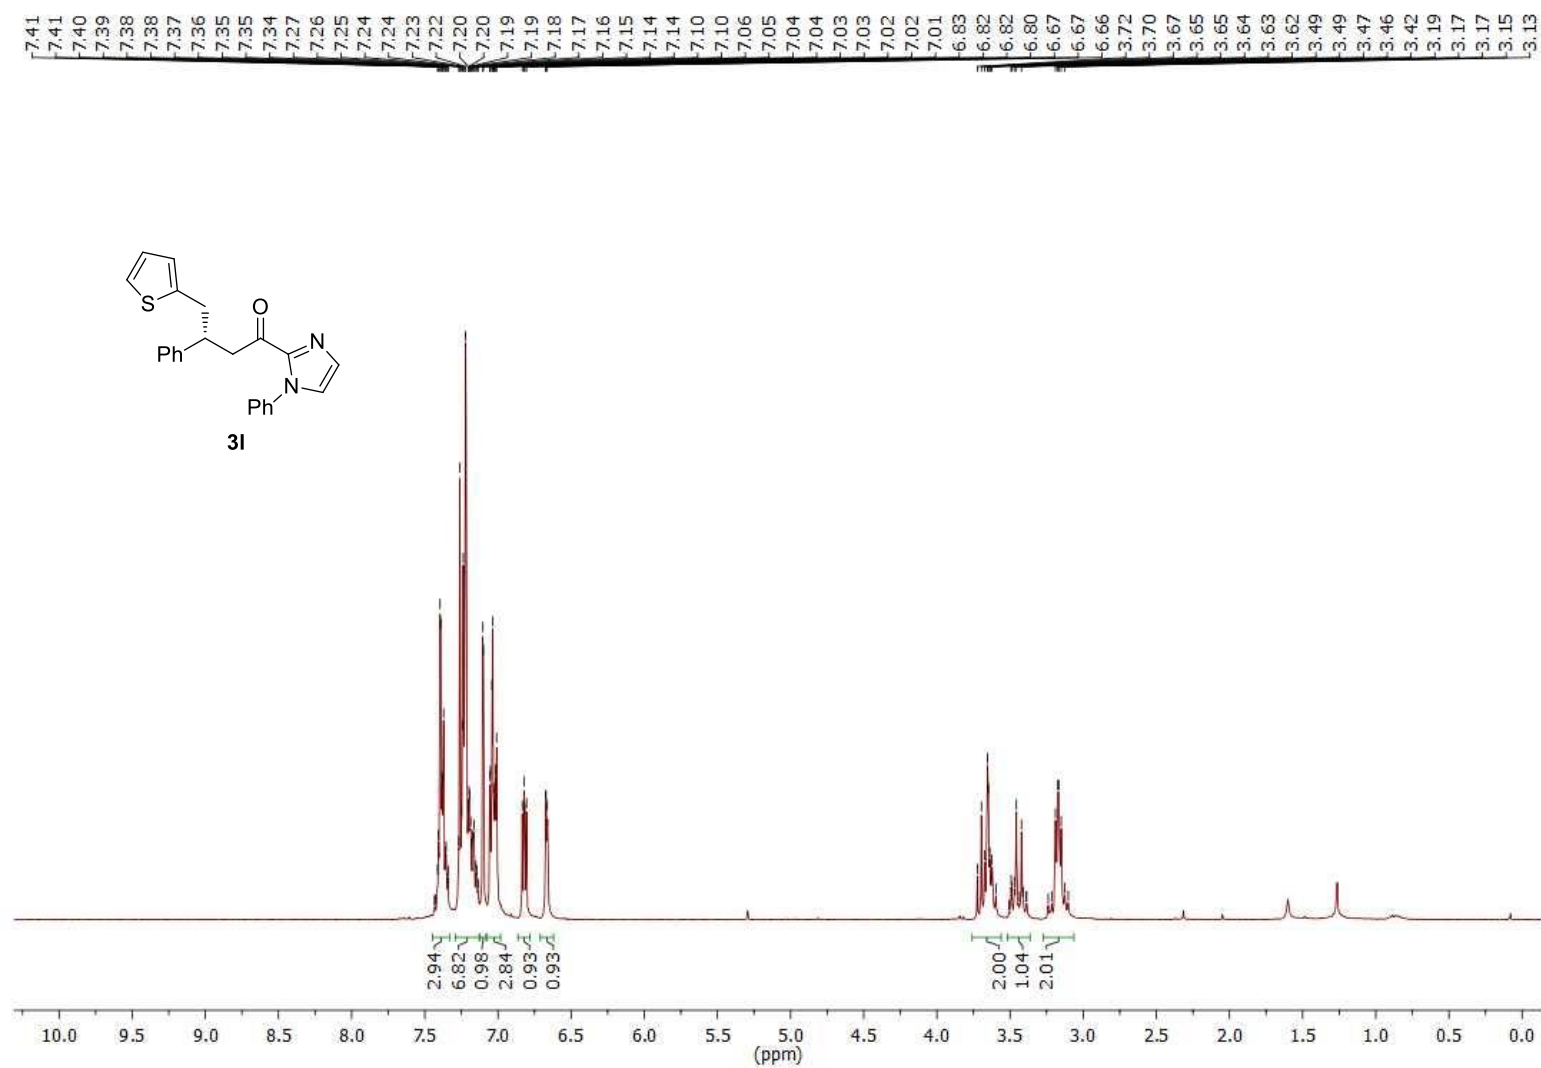

Figure S55. <sup>1</sup>H spectrum of **3l**.

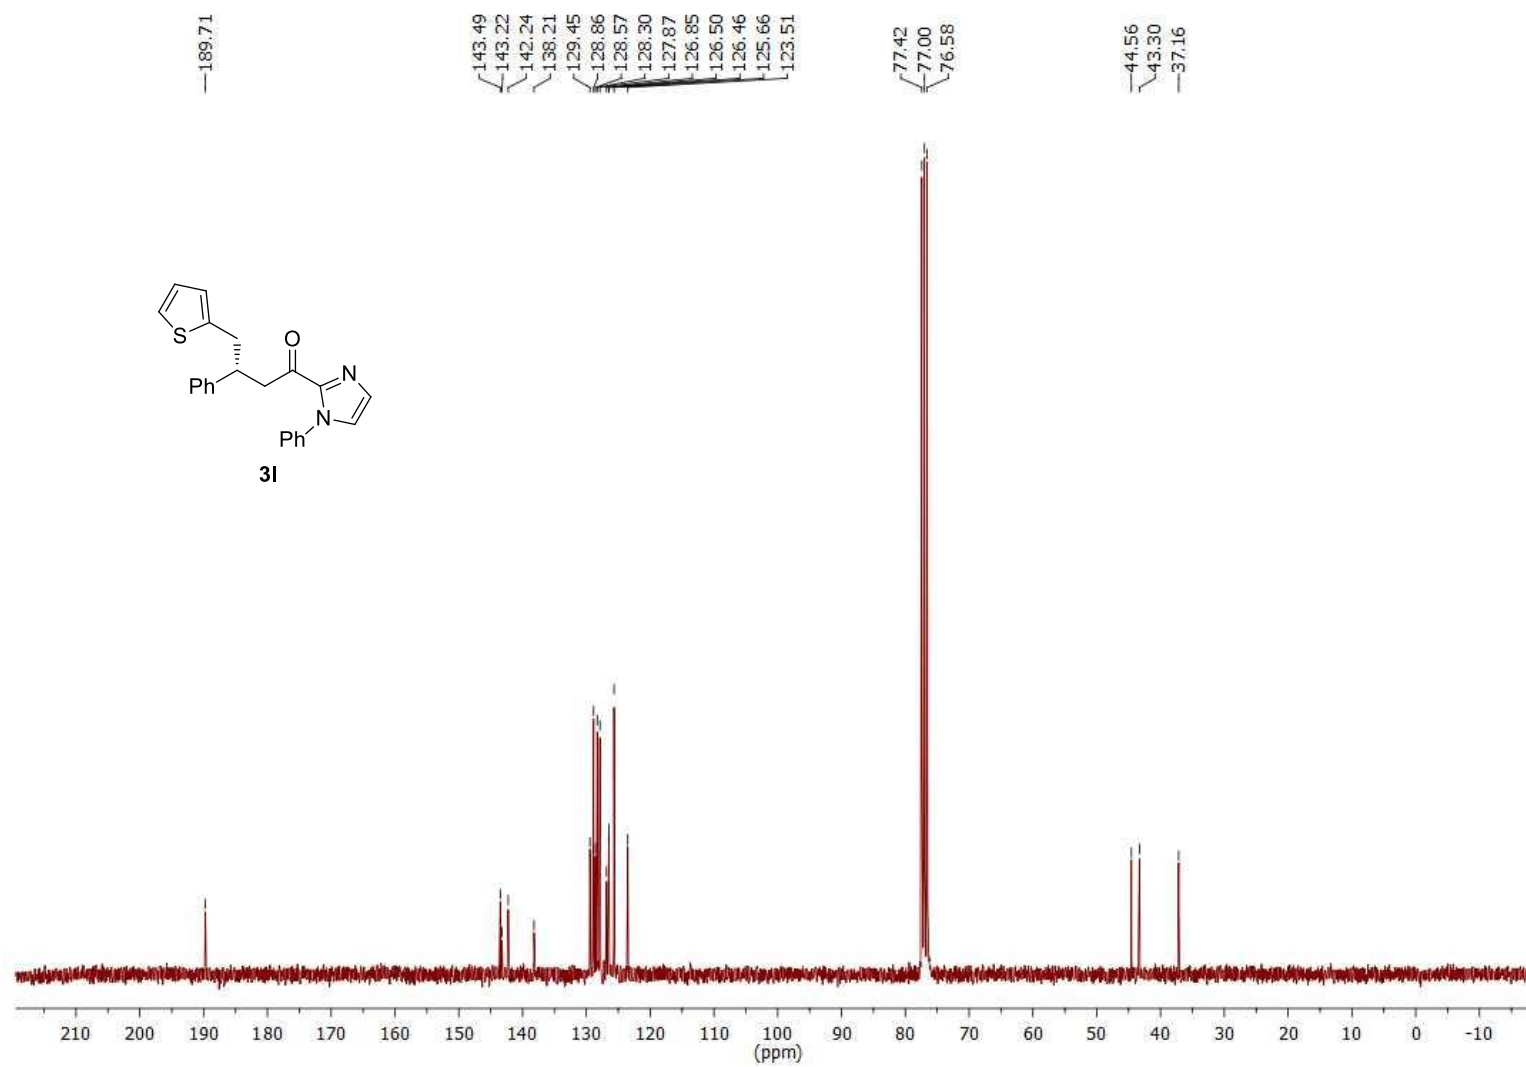

Figure S56.  $^{13}\text{C}$  spectrum of **3l**.

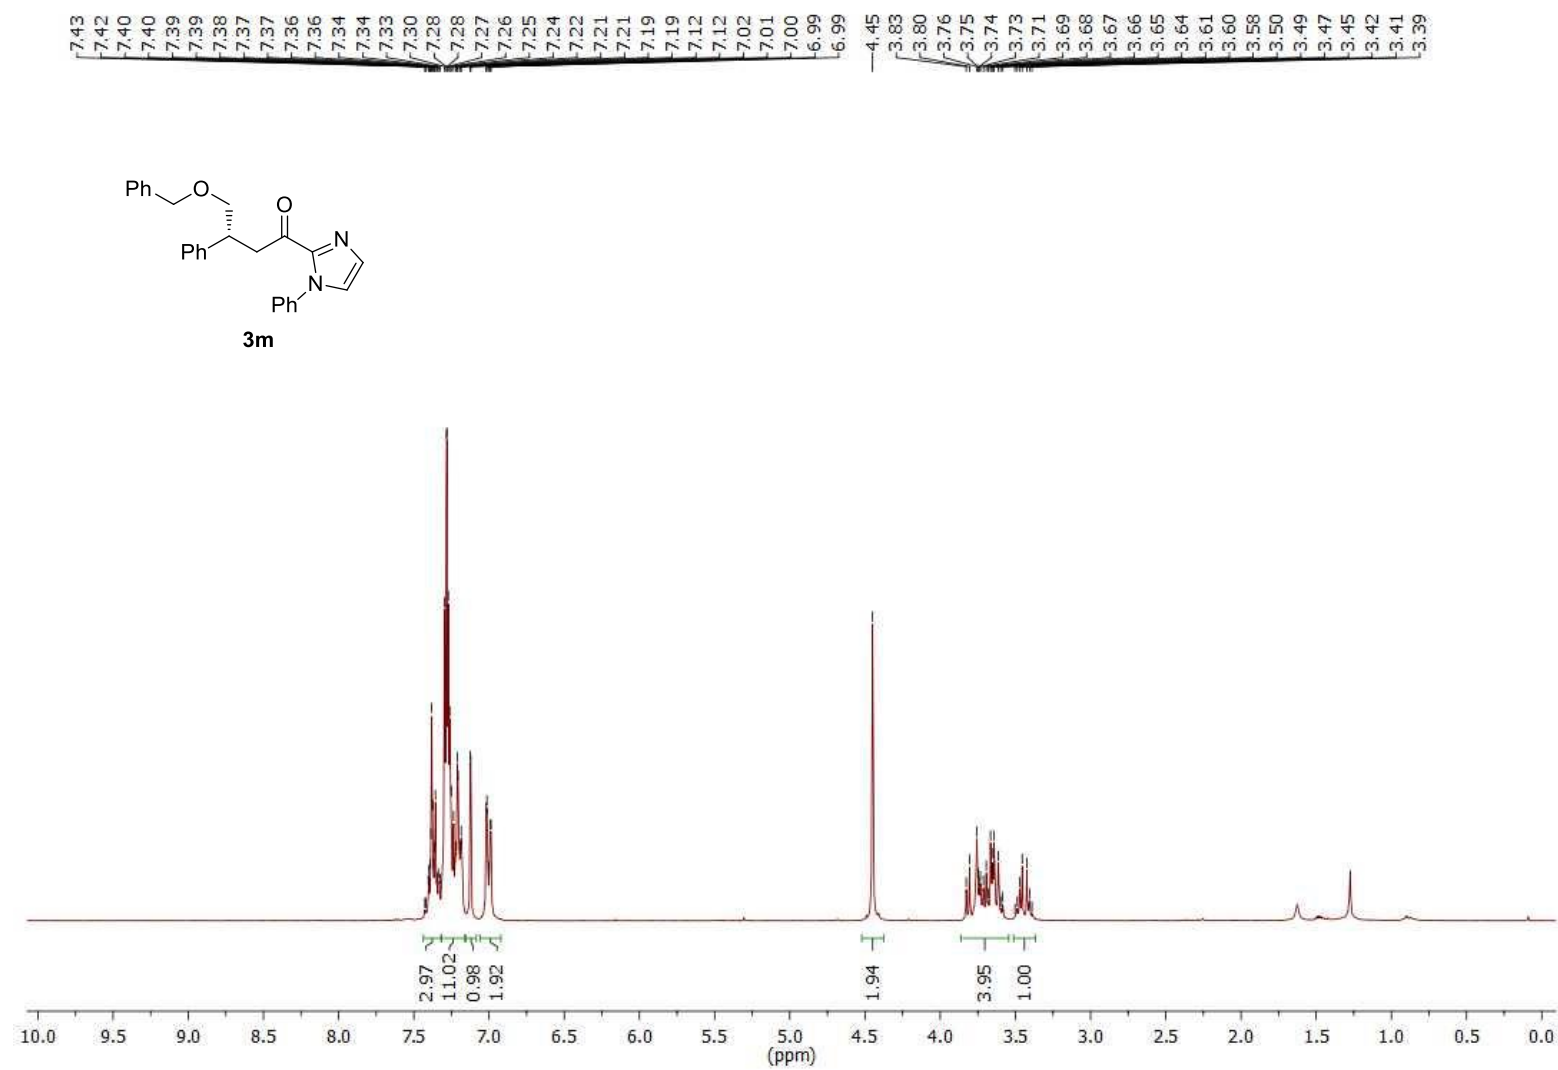

Figure S57. <sup>1</sup>H spectrum of **3m**.

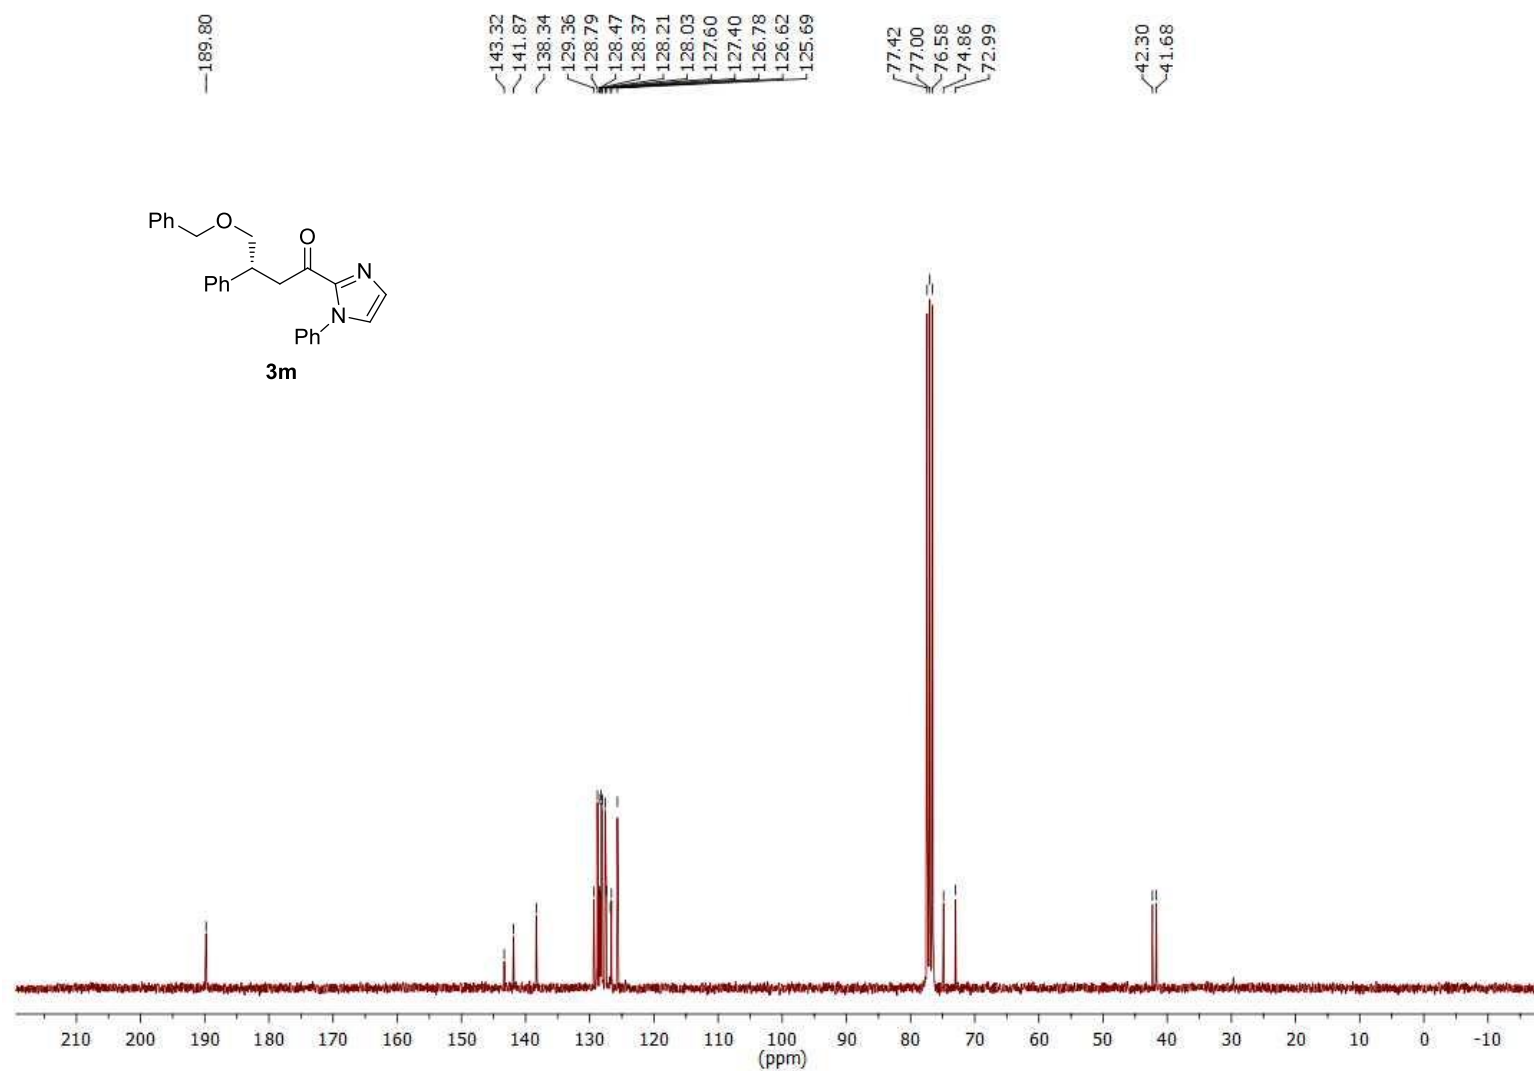

**Figure S58.**  $^{13}\text{C}$  spectrum of **3m**.

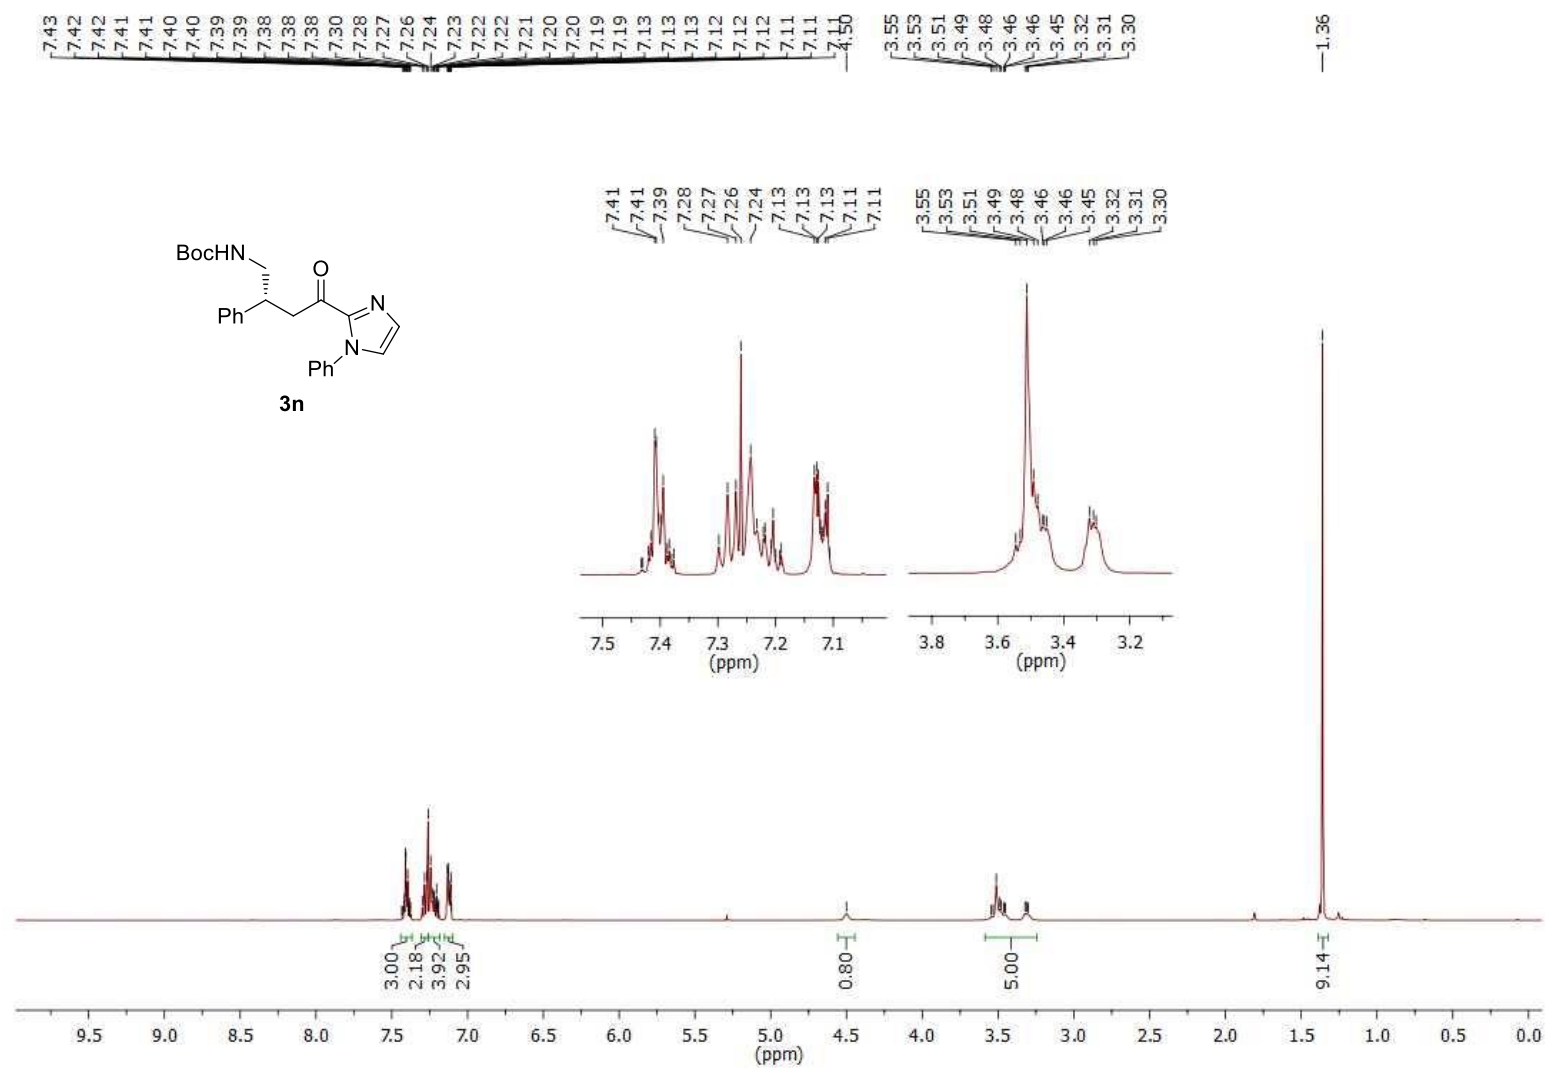

Figure S59. <sup>13</sup>C spectrum of **3n**.

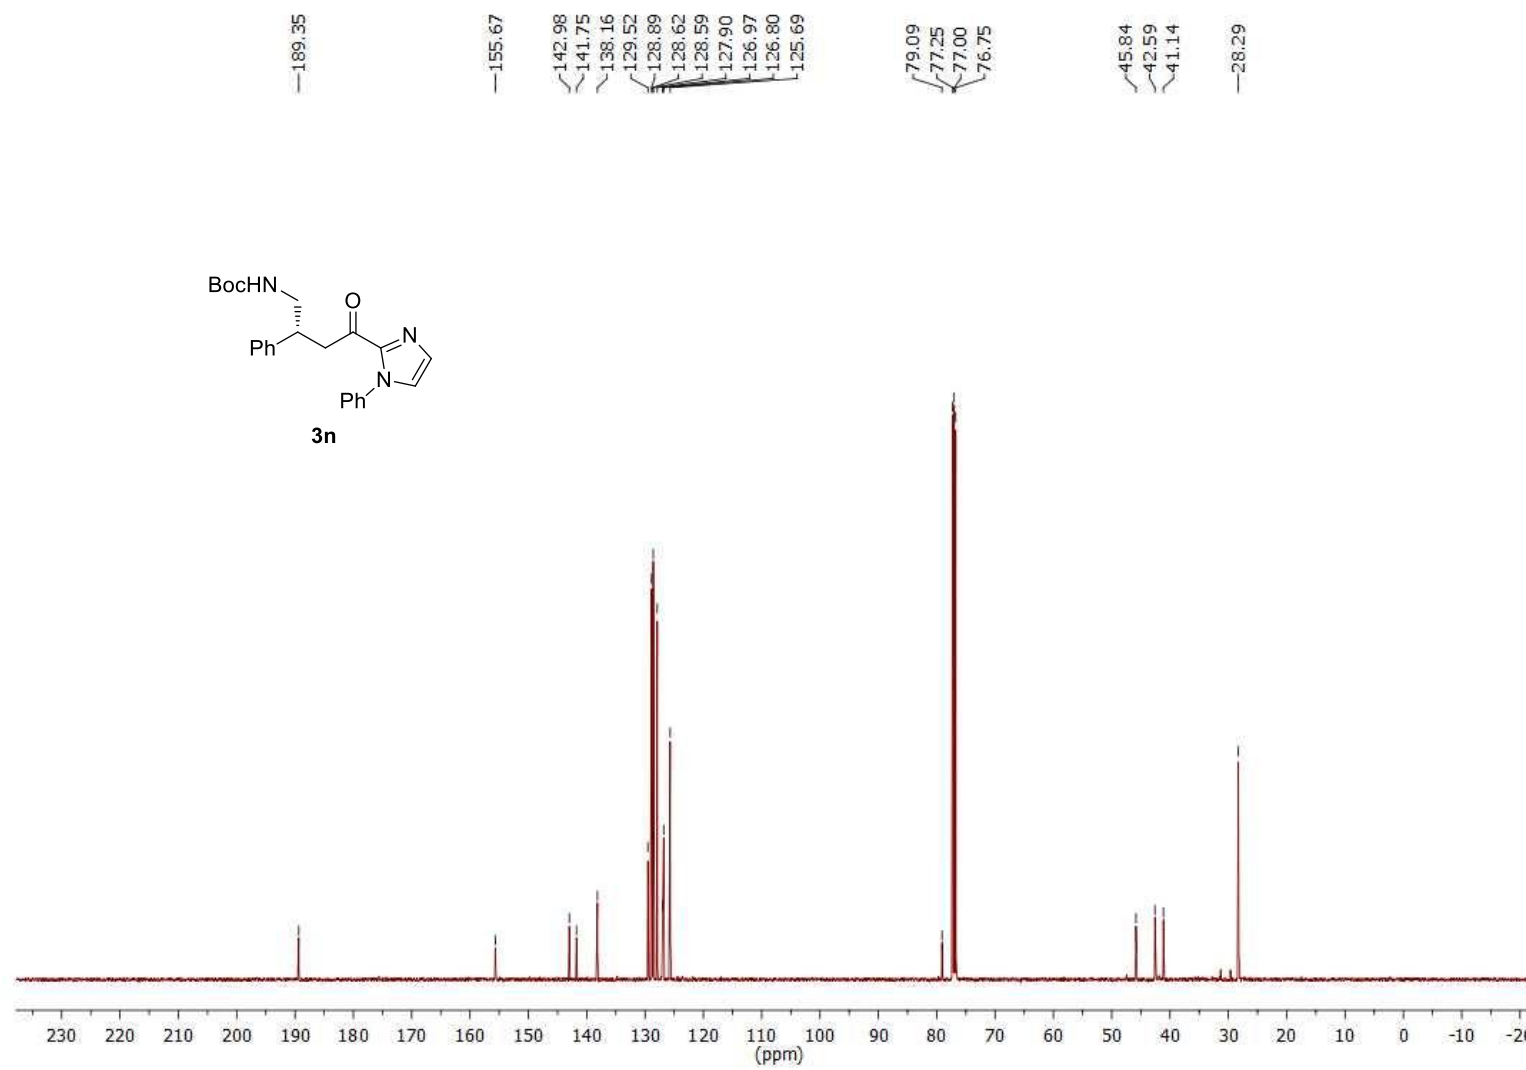

**Figure S60.**  $^{13}\text{C}$  spectrum of **3n**.

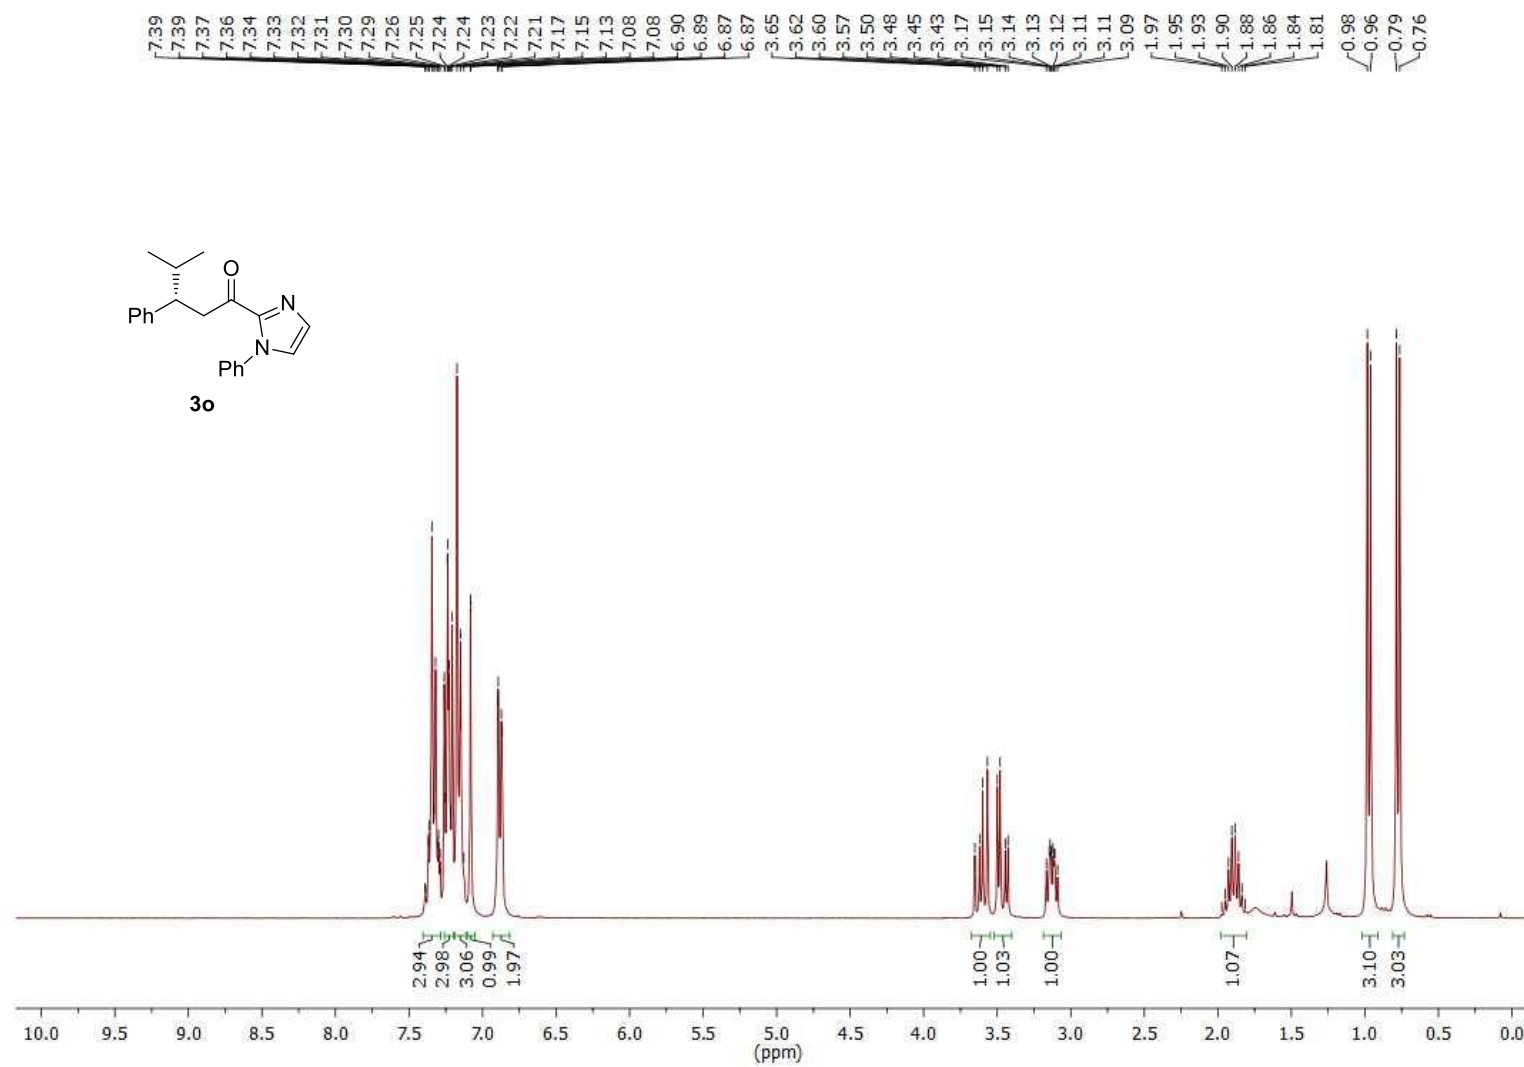

Figure S61. <sup>1</sup>H spectrum of **3o**.



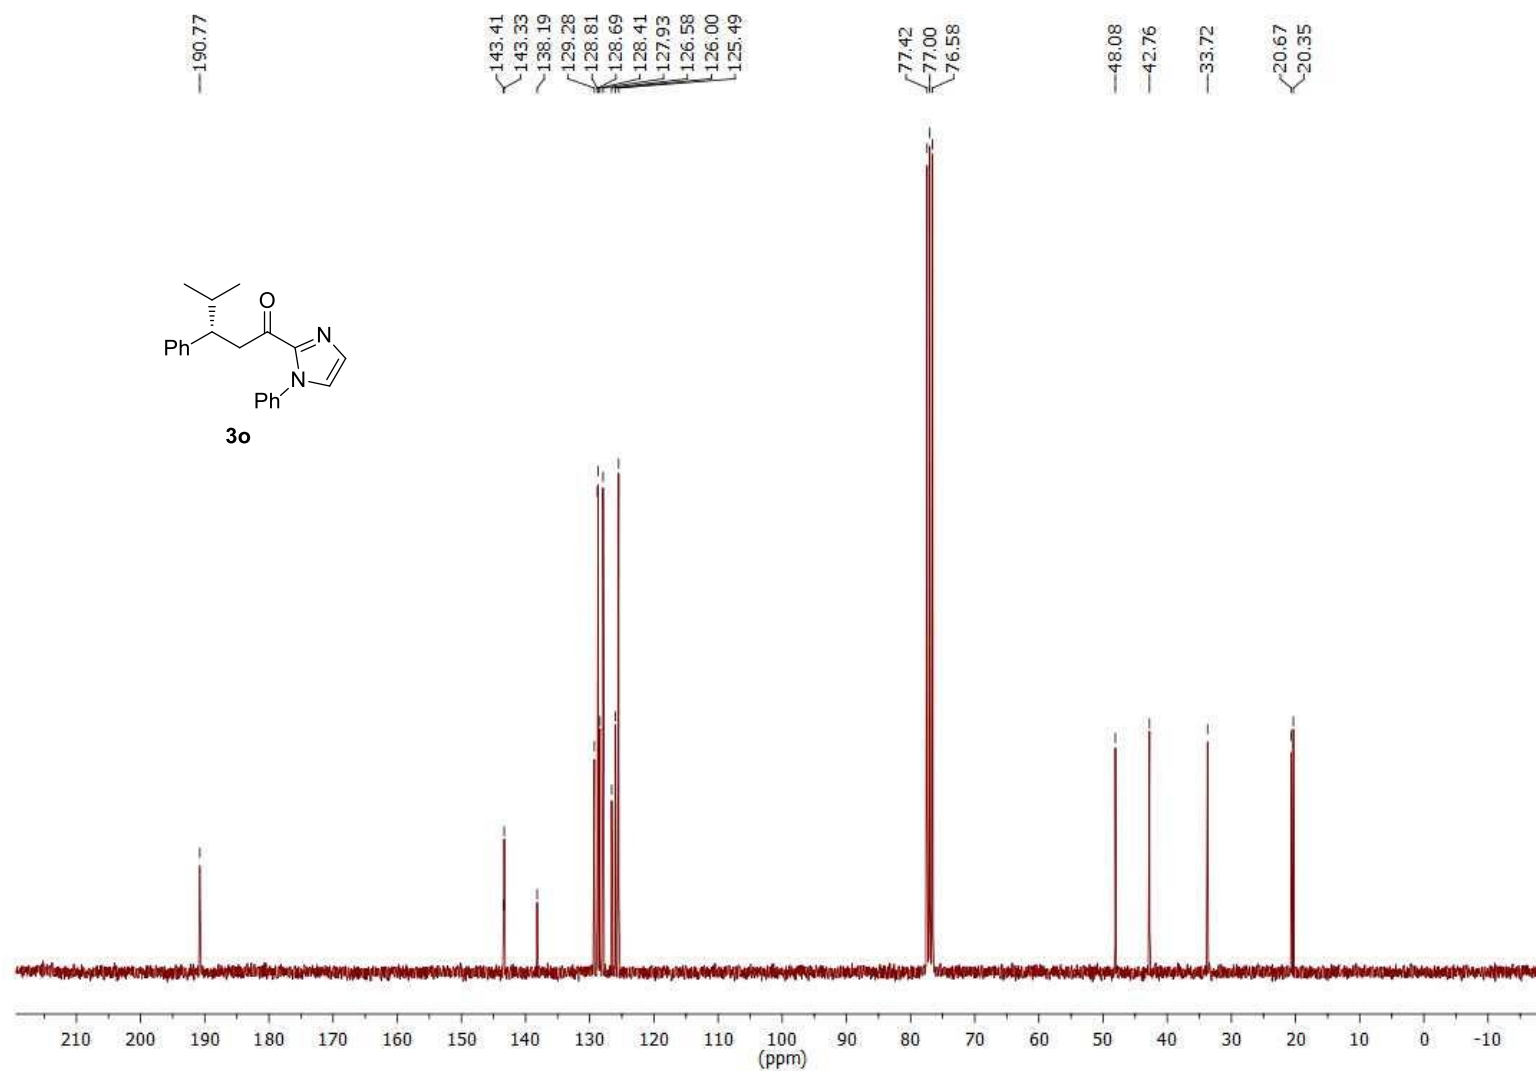

**Figure S62.**  $^{13}\text{C}$  spectrum of **3o**.
